# Supplementary material for: The art of the possible: computational design of the 1D and 2D materials based on the tetraoxa[8]circulene monomer
Source: Royal Society of Chemistry journal article supplement (doi:10.1039/c4ra02693d), 2014-01-01
Supplement: c4ra02693d1.pdf [file c4ra02693d1.pdf]

# The art of the possible: computational design of the 1D and 2D materials based on the tetraoxa[8]circulene monomer

Gleb V. Baryshnikov,<sup>\*a</sup> Boris F. Minaev<sup>a,b</sup>, Nataliya N. Karaush<sup>a</sup> and  
Valentina A. Minaeva<sup>a</sup>

<sup>a</sup> Bohdan Khmelnytsky National University, Cherkassy, 18031, Ukraine.

E-mail: [glebchem@rambler.ru](mailto:glebchem@rambler.ru), [bfmin@rambler.ru](mailto:bfmin@rambler.ru), [karaush22@ukr.net](mailto:karaush22@ukr.net)

<sup>b</sup>Tomsk State University, 634050, Tomsk, Russian Federation

## Electronic Supplementary Information

### List of Content

|                                                                                                                                 |             |
|---------------------------------------------------------------------------------------------------------------------------------|-------------|
| Figure S1. The bond lengths for the S <sub>0</sub> and T <sub>1</sub> states for the main fragment of the compound <b>1</b>     | <b>p.2</b>  |
| Figure S2. MOs diagram for compound <b>1</b>                                                                                    | <b>p.3</b>  |
| Figure S3. MOs diagram for compound <b>2</b>                                                                                    | <b>p.4</b>  |
| Figure S4. MOs diagram for compound <b>3</b>                                                                                    | <b>p.4</b>  |
| Figure S5. MOs diagram for compound <b>4</b>                                                                                    | <b>p.5</b>  |
| Figure S6. MOs diagram for compound <b>5</b>                                                                                    | <b>p.6</b>  |
| Figure S7. NICS(0) and NICS(1) calculations for compound <b>1</b> <sup>2-</sup> and <b>1</b> <sup>2+</sup>                      | <b>p.7</b>  |
| Figure S8. The Ullman-type polymerization as the possible route to synthesize the TOC-based sheets                              | <b>p.8</b>  |
| Table S1. S <sub>0</sub> →S <sub>1</sub> and S <sub>0</sub> →T <sub>1</sub> electronic transitions for the compounds <b>1–5</b> | <b>p.9</b>  |
| Table S2. S <sub>0</sub> →S <sub>1</sub> and S <sub>0</sub> →T <sub>1</sub> electronic transitions for the <b>1D ribbons</b>    | <b>p.12</b> |
| Table S3. Total energy for compounds <b>1–5</b>                                                                                 | <b>p.15</b> |
| Optimized Cartesian coordinates of compounds <b>1–5</b> (Tables S4–S13)                                                         | <b>p.16</b> |

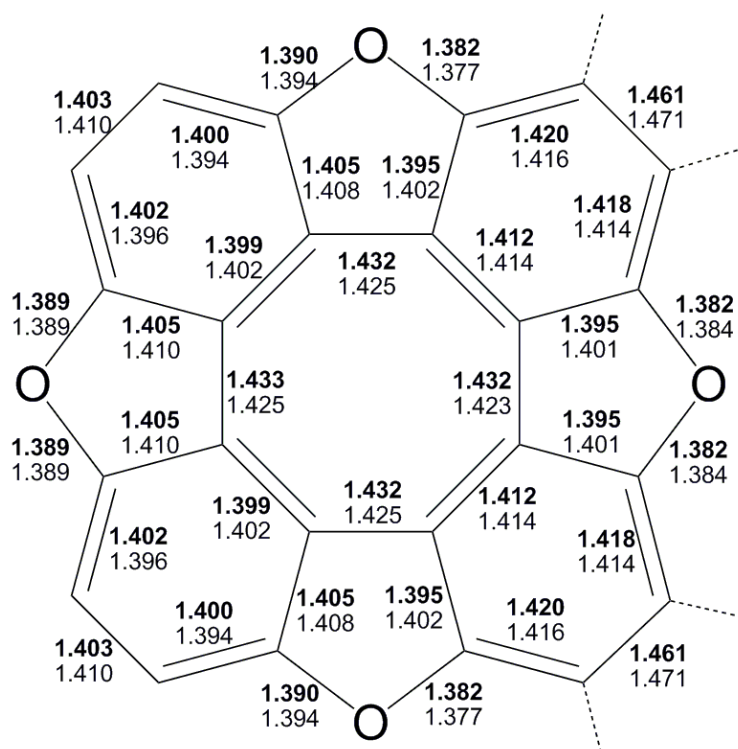

**Figure S1.** The bond lengths for the S<sub>0</sub> (in bold) and T<sub>1</sub> states (top) for the main fragment of the compound **1** calculated at the B3LYP/6-21G(d) theory level.\*

\* The 6-21G(d) double-valence split basis set affords us to optimize all studied systems which consist at the most of 432 atoms (compounds **4** and **5**). The extension of the chosen basis set prevents optimization of all studied molecules at the uniform level of accuracy. For comparison we have optimized the sheet **1** with the 6-31G(d) basis set. The calculated deviations in the structural parameters are negligible (no more than 0.004 Å for the bond lengths) and all conclusions remain. Thus, the choice of the 6-21G(d) basis set is quite justified by a very big size of the studied systems.

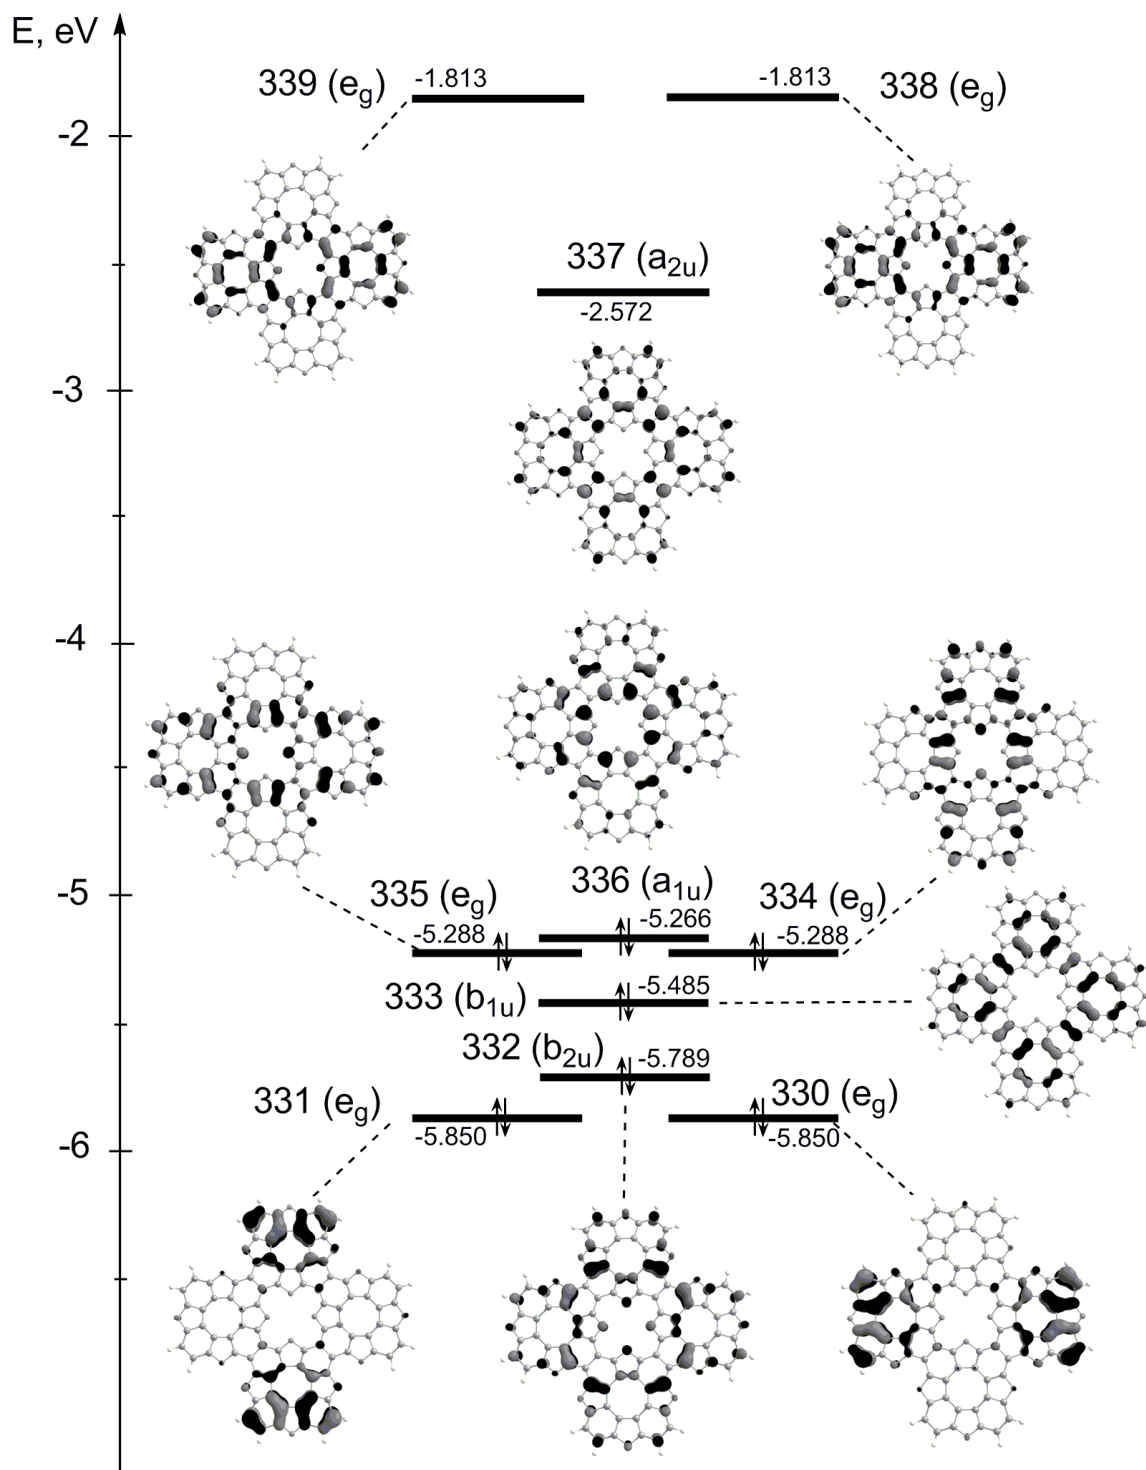

**Figure S2.** Molecular orbital diagram of the compound **1** calculated at the B3LYP/6-21G(d) level of theory. The highest occupied and lowest empty MO are numerated and their symmetry in the  $D_{4h}$  point group are given in parenthesis.

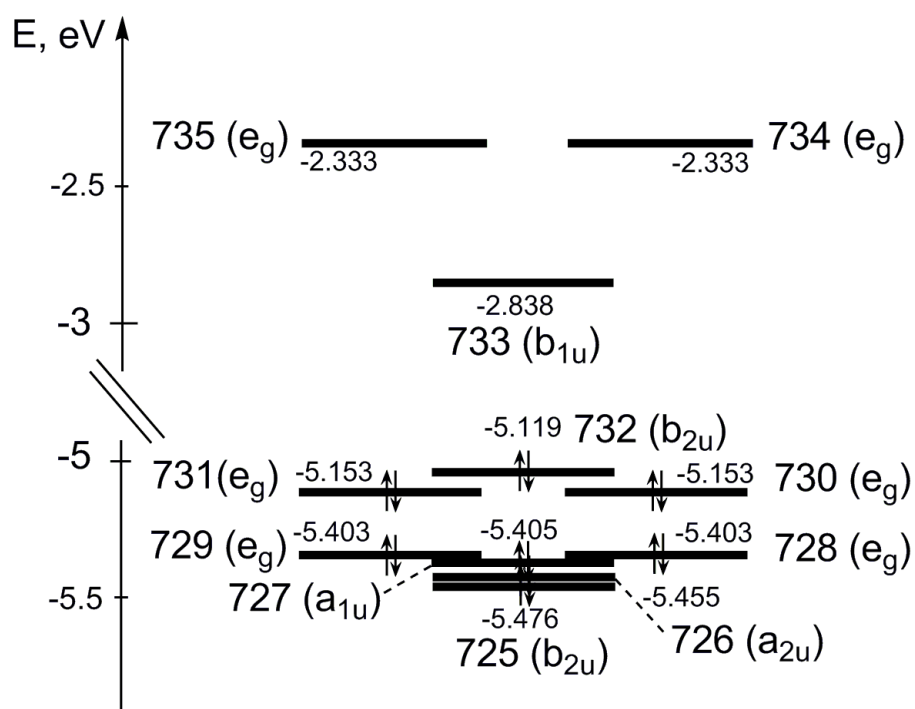

**Figure S3.** Molecular orbital energy diagram of the compound **2** calculated at the B3LYP/6-21G(d) level of theory

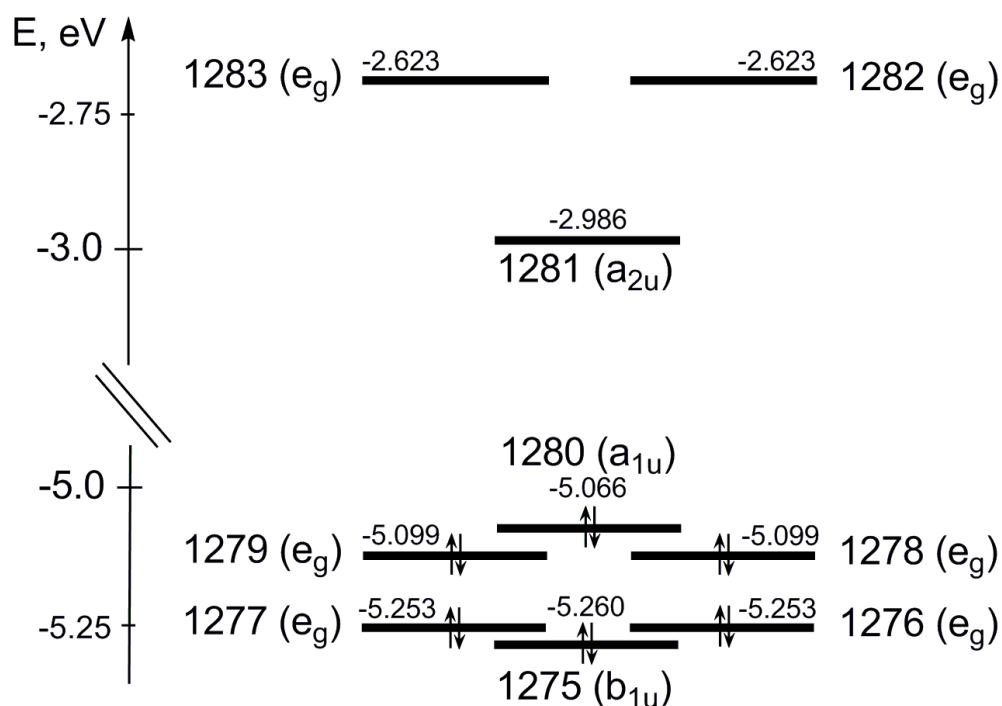

**Figure S4.** Molecular orbital energy diagram of the compound **3** calculated at the B3LYP/6-21G(d) level of theory

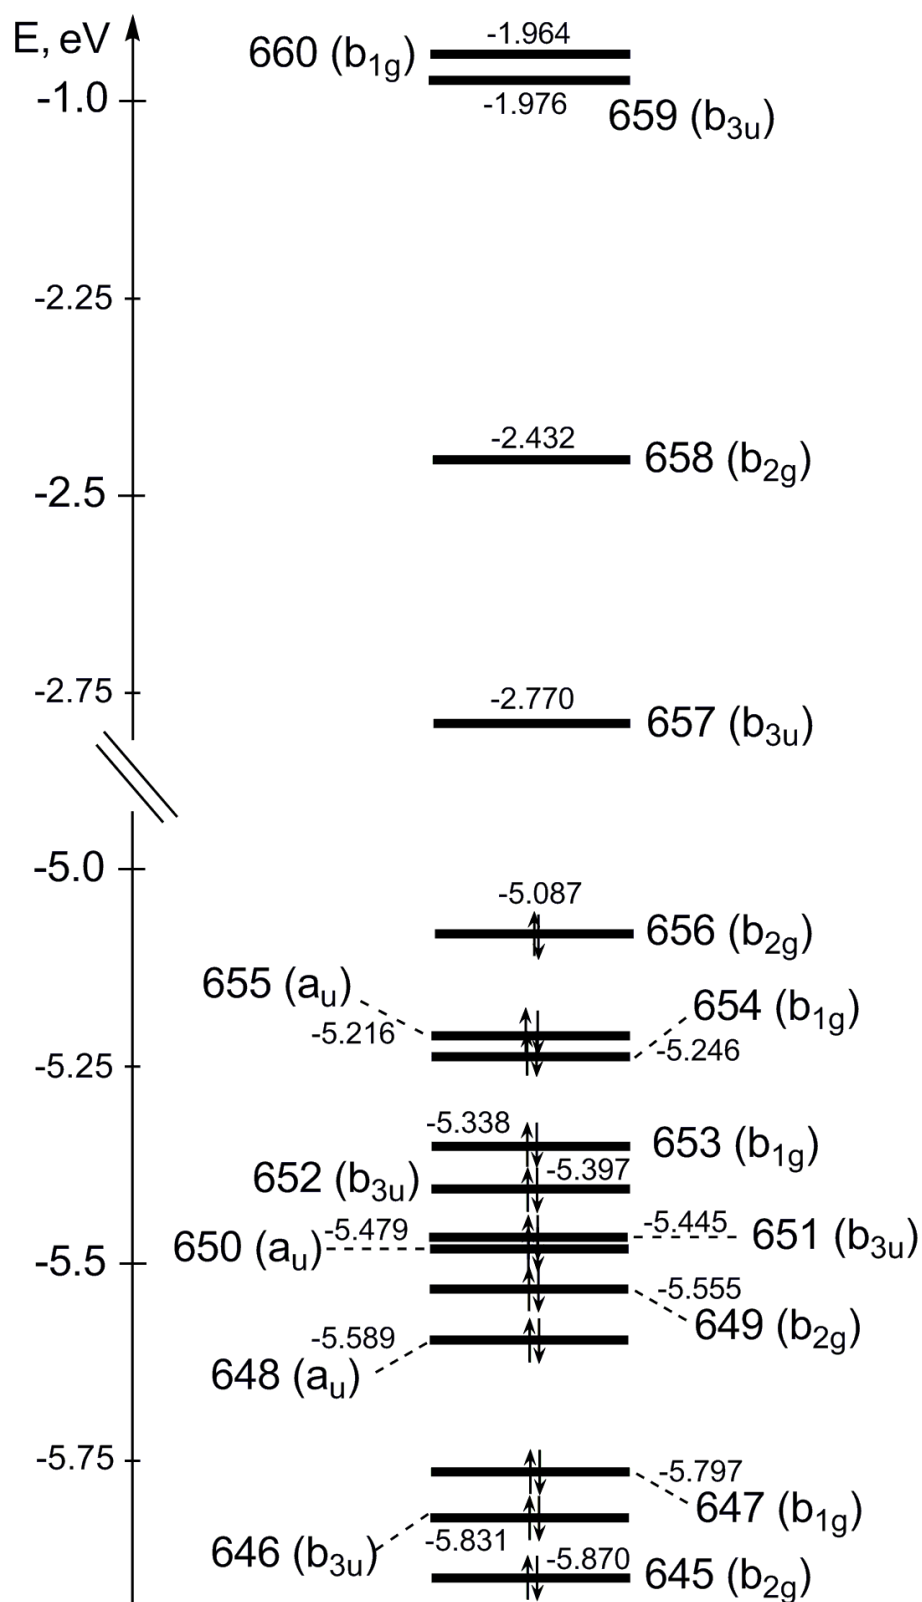

**Figure S5.** Molecular orbital energy diagram of the compound **4** calculated at the B3LYP/6-21G(d) level of theory

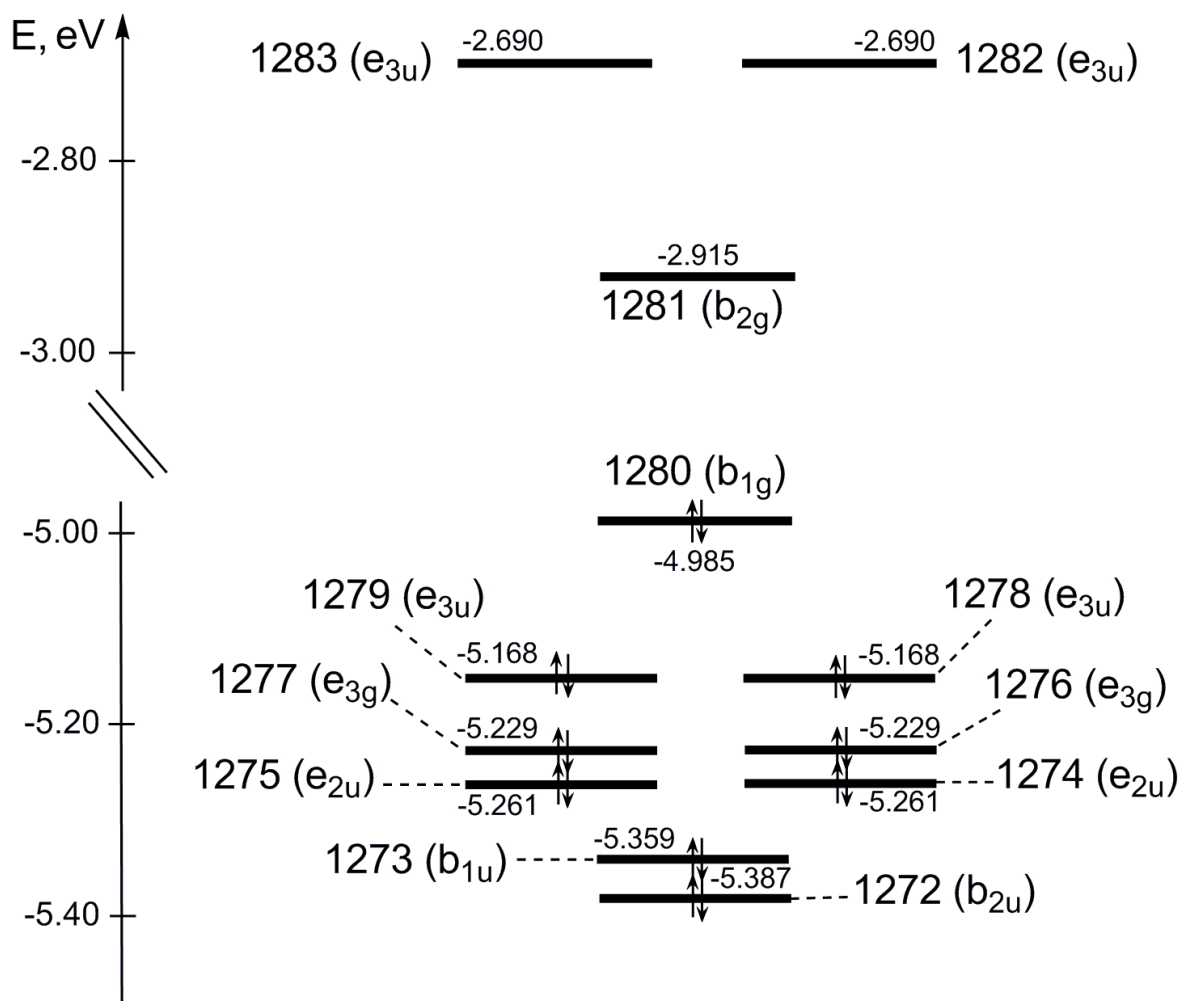

**Figure S6.** Molecular orbital energy diagram of the compound **5** calculated at the B3LYP/6-21G(d) level of theory

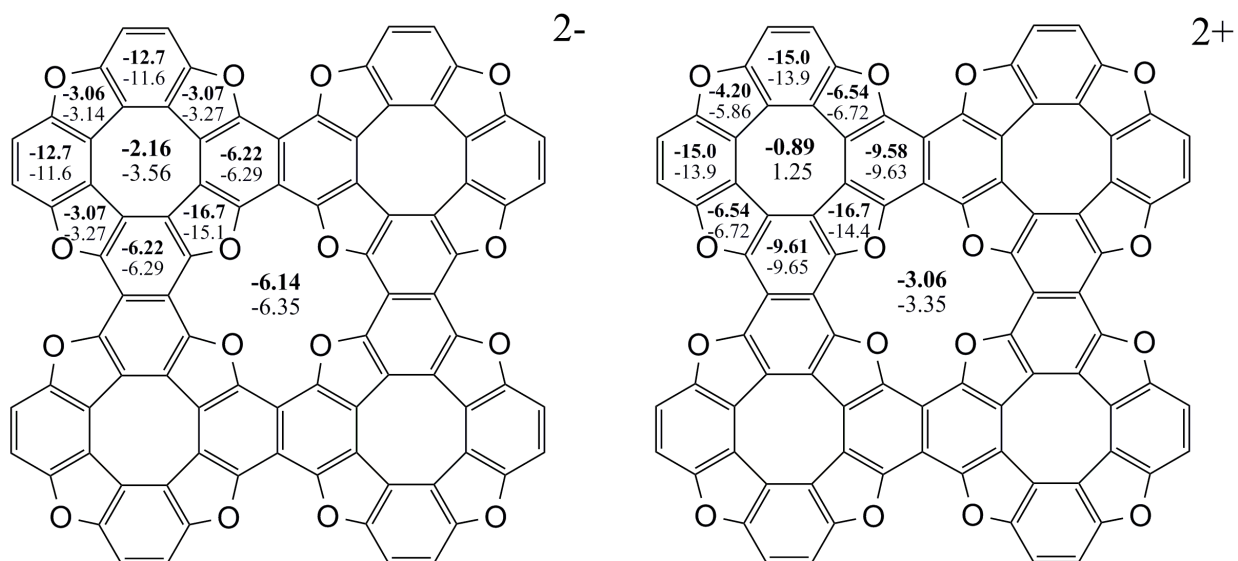

**Figure S7.** The NICS(0) (bold type in top) and NICS (1) (bottom) indexes calculated at the GIAO B3LYP/6-311++G(d,p) level of theory for the dicationic and dianionic forms of the compound **1**.

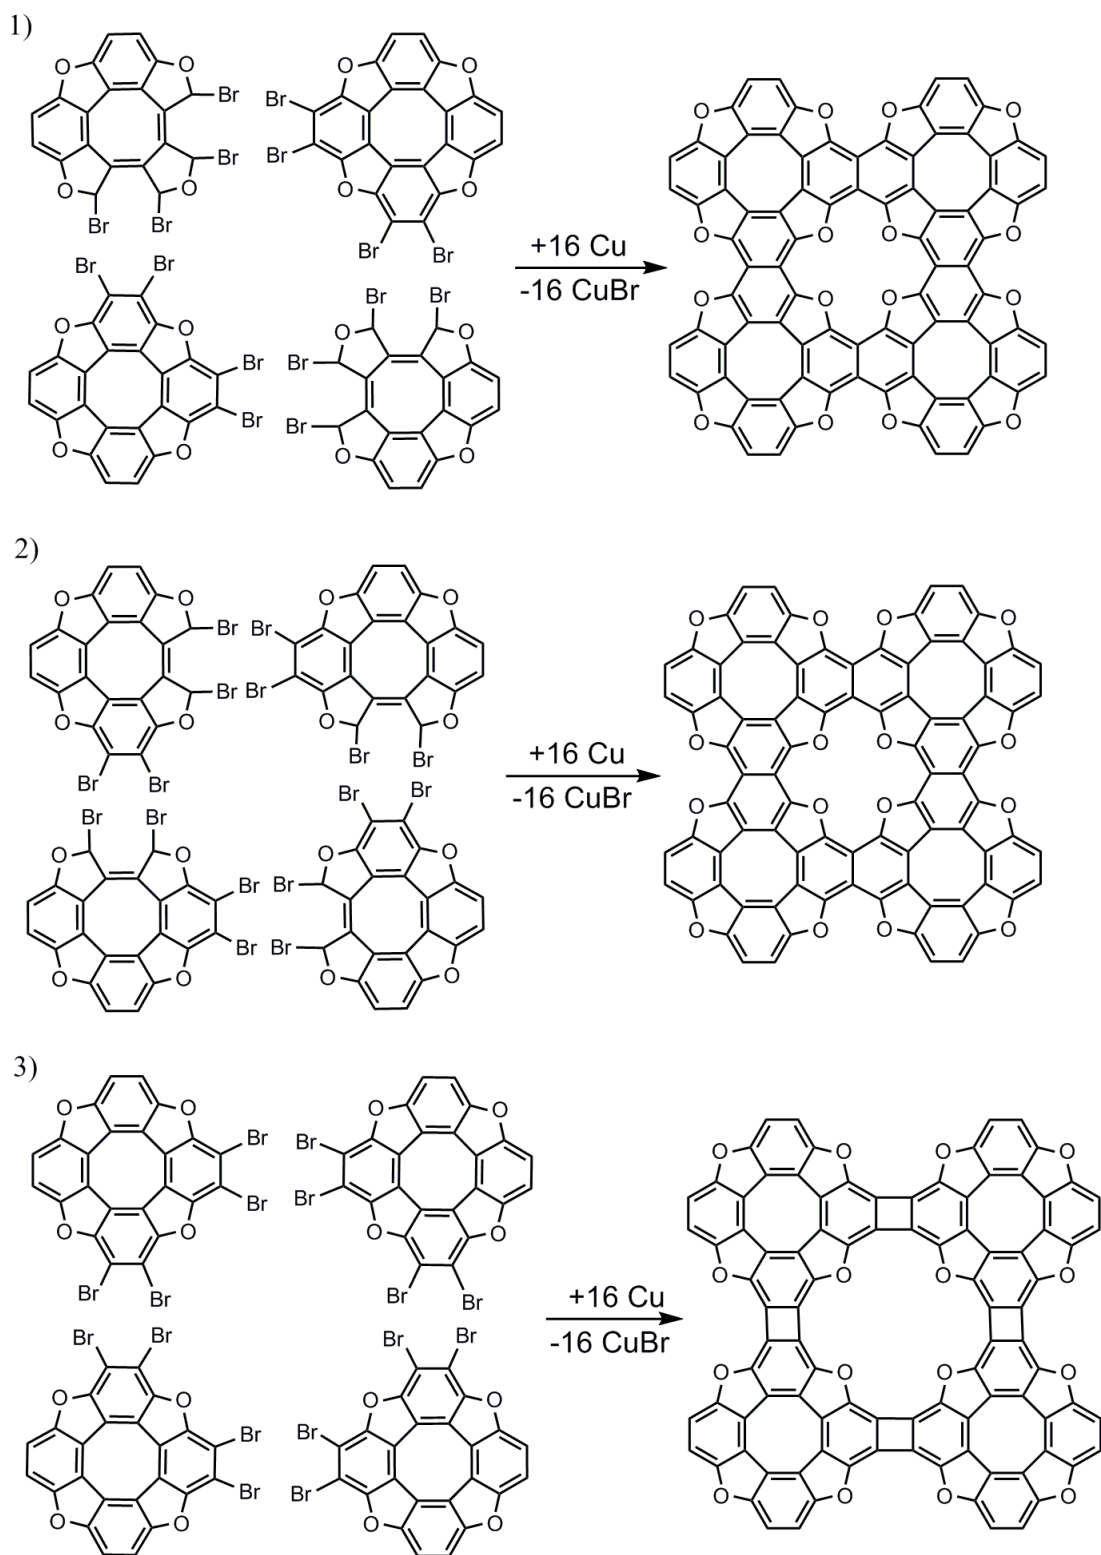

**Figure S8.** The Ullman-type polymerization as the possible route to synthesize the TOC-based sheets.



**Table S1.** Calculated parameters and assignment of the vertical electronic transitions in the electronic absorption spectrum of the compounds **1–5** at the B3LYP/3–21G Level

| State               | Transition                                                     | $\lambda$ ,<br>nm | $M_{xy}$ ,<br>a.u. | $\mu_z, \beta$ | $f$   | Assignment<br>(in vacuum approximation)                                                             |
|---------------------|----------------------------------------------------------------|-------------------|--------------------|----------------|-------|-----------------------------------------------------------------------------------------------------|
| <b>Compound 1</b>   |                                                                |                   |                    |                |       |                                                                                                     |
| T <sub>1(2)</sub>   | X <sup>1</sup> A <sub>1g</sub> →1 <sup>3</sup> E <sub>u</sub>  | 567               | 0                  | 0              | 0.000 | 0.47(335, 334→337) + 0.46[(335→337) – (334→337)]                                                    |
| T <sub>3</sub>      | X <sup>1</sup> A <sub>1g</sub> →1 <sup>3</sup> A <sub>2g</sub> | 561               | 0                  | 0              | 0.000 | 0.66(336→337) – 0.11[(335→338) – (334→339)]                                                         |
| S <sub>1</sub>      | X <sup>1</sup> A <sub>1g</sub> →1 <sup>1</sup> A <sub>2g</sub> | 519               | 0                  | 6.22           | 0.000 | 0.70(336→337)                                                                                       |
| S <sub>2(3)</sub>   | X <sup>1</sup> A <sub>1g</sub> →1 <sup>1</sup> E <sub>u</sub>  | 482               | 3.40               | 0              | 0.730 | 0.70(335, 334→337)                                                                                  |
| S <sub>4</sub>      | X <sup>1</sup> A <sub>1g</sub> →1 <sup>1</sup> B <sub>2g</sub> | 475               | 0                  | 0              | 0.000 | 0.70(333→337)                                                                                       |
| S <sub>5(6)</sub>   | X <sup>1</sup> A <sub>1g</sub> →2 <sup>1</sup> E <sub>u</sub>  | 417               | 0.66               | 0              | 0.031 | 0.50(330, 331→337) + 0.45[(330→337) – (331→337)] + 0.12[(333→338) – (333→339)] + 0.11(333→338, 339) |
| S <sub>7</sub>      | X <sup>1</sup> A <sub>1g</sub> →1 <sup>1</sup> B <sub>1g</sub> | 411               | 0                  | 0              | 0.000 | 0.67(332→337)                                                                                       |
| S <sub>8</sub>      | X <sup>1</sup> A <sub>1g</sub> →2 <sup>1</sup> A <sub>2g</sub> | 395               | 0                  | 2.74           | 0.000 | 0.49[(335→339) + (334→338)]                                                                         |
| S <sub>9</sub>      | X <sup>1</sup> A <sub>1g</sub> →2 <sup>1</sup> B <sub>1g</sub> | 388               | 0                  | 0              | 0.000 | 0.47[(335→338) + (334→339)] + 0.17(332→337)                                                         |
| S <sub>10</sub>     | X <sup>1</sup> A <sub>1g</sub> →3 <sup>1</sup> A <sub>2g</sub> | 384               | 0                  | 0              | 0.000 | 0.49[(334→338) – (335→339)]                                                                         |
| S <sub>11(12)</sub> | X <sup>1</sup> A <sub>1g</sub> →3 <sup>1</sup> E <sub>u</sub>  | 382               | 1.66               | 0              | 0.219 | 0.48[(335→338) – (334→339)] + 0.46(334→339) – 0.47(336→339)                                         |
| S <sub>13</sub>     | X <sup>1</sup> A <sub>1g</sub> →4 <sup>1</sup> A <sub>2g</sub> | 379               | 0                  | 0              | 0.000 | 0.50(329→337) + 0.34[(334→338) – (335→339)]                                                         |
| S <sub>14</sub>     | X <sup>1</sup> A <sub>1g</sub> →5 <sup>1</sup> A <sub>2g</sub> | 371               | 0                  | 0              | 0.000 | 0.48(329→337) + 0.34[(335→339) – (334→338)]                                                         |
| S <sub>15</sub>     | X <sup>1</sup> A <sub>1g</sub> →2 <sup>1</sup> B <sub>2g</sub> | 370               | 0                  | 0              | 0.000 | 0.69(328→337) – 0.12 (336→340)                                                                      |
| S <sub>16(17)</sub> | X <sup>1</sup> A <sub>1g</sub> →4 <sup>1</sup> E <sub>u</sub>  | 369               | 1.00               | 0              | 0.082 | 0.64(333→338,339) – 0.15[(331→337) + (330→337)] – 0.11(325,327→337)                                 |
| S <sub>18</sub>     | X <sup>1</sup> A <sub>1g</sub> →3 <sup>1</sup> B <sub>1g</sub> | 365               | 0                  | 0              | 0.000 | 0.69(327→337)                                                                                       |
| S <sub>19(20)</sub> | X <sup>1</sup> A <sub>1g</sub> →5 <sup>1</sup> E <sub>u</sub>  | 363               | 0.99               | 0              | 0.082 | 0.66(325,326→337) – 0.16[(325→337) + (326→337)] + 0.11(333→338,339)                                 |
| <b>Compound 2</b>   |                                                                |                   |                    |                |       |                                                                                                     |
| T <sub>1(2)</sub>   | X <sup>1</sup> A <sub>1g</sub> →1 <sup>3</sup> E <sub>u</sub>  | 630               | 0                  | 0              | 0.000 | 0.60(730,731→733) + 0.27[(731→733) – (730→733)]                                                     |
| T <sub>3</sub>      | X <sup>1</sup> A <sub>1g</sub> →1 <sup>3</sup> A <sub>2g</sub> | 629               | 0                  | 0              | 0.000 | 0.64(732→733) + 0.12[(731→734) – (730→735)]                                                         |
| S <sub>1</sub>      | X <sup>1</sup> A <sub>1g</sub> →1 <sup>1</sup> A <sub>2g</sub> | 592               | 0                  | 10.69          | 0.000 | 0.69(732→733)                                                                                       |
| S <sub>2(3)</sub>   | X <sup>1</sup> A <sub>1g</sub> →1 <sup>1</sup> E <sub>u</sub>  | 561               | 0.89               | 0              | 1.158 | 0.67(730,731→733) + 0.16[(729→733) – (728→733)]                                                     |
| S <sub>4</sub>      | X <sup>1</sup> A <sub>1g</sub> →1 <sup>1</sup> B <sub>1g</sub> | 522               | 0                  | 0.001          | 0.000 | 0.67(727→733)                                                                                       |
| S <sub>5(6)</sub>   | X <sup>1</sup> A <sub>1g</sub> →2 <sup>1</sup> E <sub>u</sub>  | 520               | 2.49               | 0              | 0.362 | 0.65(728,729→733) + 0.18[(731→733) – (730→733)] – 0.16(732→734, 735)                                |
| S <sub>7</sub>      | X <sup>1</sup> A <sub>1g</sub> →2 <sup>1</sup> A <sub>2g</sub> | 512               | 0                  | 0.51           | 0.000 | 0.69(725→733)                                                                                       |
| S <sub>8</sub>      | X <sup>1</sup> A <sub>1g</sub> →1 <sup>1</sup> B <sub>2g</sub> | 493               | 0                  | 0              | 0.000 | 0.69(726→733)                                                                                       |
| S <sub>9(10)</sub>  | X <sup>1</sup> A <sub>1g</sub> →3 <sup>1</sup> E <sub>u</sub>  | 472               | 0.84               | 0              | 0.046 | 0.64(724→733) + 0.14(725, 732→734) + (727→735)]                                                     |

| Compound 3        |                                                                |     |      |       |       |                                                                                                       |
|-------------------|----------------------------------------------------------------|-----|------|-------|-------|-------------------------------------------------------------------------------------------------------|
| T <sub>1(2)</sub> | X <sup>1</sup> A <sub>1g</sub> →1 <sup>3</sup> E <sub>u</sub>  | 667 | 0    | 0     | 0.000 | 0.56(1278, 1279→1281) + 0.33[(1279→1281) – (1278→1281)]                                               |
| T <sub>3</sub>    | X <sup>1</sup> A <sub>1g</sub> →1 <sup>3</sup> A <sub>2g</sub> | 666 | 0    | 0     | 0.000 | 0.63(1280→1281) – 0.12(1278→1282) – (1279→1283) – (1277→1283) – (1276→1282)]                          |
| S <sub>1</sub>    | X <sup>1</sup> A <sub>1g</sub> →1 <sup>1</sup> A <sub>2g</sub> | 635 | 0    | 15.62 | 0.000 | 0.68(1280→1281)                                                                                       |
| S <sub>2(3)</sub> | X <sup>1</sup> A <sub>1g</sub> →1 <sup>1</sup> E <sub>u</sub>  | 610 | 5.69 | 0     | 1.605 | 0.66(1278,1279→1281) – 0.21(1276,1277→1281)                                                           |
| S <sub>4</sub>    | X <sup>1</sup> A <sub>1g</sub> →1 <sup>1</sup> B <sub>2g</sub> | 578 | 0    | 0     | 0.000 | 0.66(1275→1281)                                                                                       |
| S <sub>5(6)</sub> | X <sup>1</sup> A <sub>1g</sub> →2 <sup>1</sup> E <sub>u</sub>  | 576 | 3.87 | 0     | 0.788 | 0.59(1276, 1277→1281) + 0.22(1278,1279→1281) – 0.21[(1276→1281) + (1277→1281)] – 0.16(1280→1282,1283) |
| Compound 4        |                                                                |     |      |       |       |                                                                                                       |
| T <sub>1</sub>    | X <sup>1</sup> A <sub>g</sub> →1 <sup>3</sup> B <sub>1u</sub>  | 632 | 0    | 0     | 0.000 | 0.66(656→657) + 0.14(652→658)                                                                         |
| T <sub>2</sub>    | X <sup>1</sup> A <sub>g</sub> →1 <sup>3</sup> B <sub>3g</sub>  | 594 | 0    | 0     | 0.000 | 0.62(655→657) – 0.22(653→658) + 0.10(656→660)                                                         |
| T <sub>3</sub>    | X <sup>1</sup> A <sub>g</sub> →1 <sup>3</sup> B <sub>2u</sub>  | 592 | 0    | 0     | 0.000 | 0.64(654→657) – 0.15(650→658)                                                                         |
| S <sub>1</sub>    | X <sup>1</sup> A <sub>g</sub> →1 <sup>1</sup> B <sub>1u</sub>  | 562 | 6.52 | 0     | 2.296 | 0.70(656→657)                                                                                         |
| S <sub>2</sub>    | X <sup>1</sup> A <sub>g</sub> →1 <sup>1</sup> B <sub>3g</sub>  | 552 | 0    | 9.29  | 0.000 | 0.68(655→657) – 0.11[(653→658) + (648→657)]                                                           |
| S <sub>3</sub>    | X <sup>1</sup> A <sub>g</sub> →1 <sup>1</sup> B <sub>2u</sub>  | 545 | 0.90 | 0     | 0.045 | 0.64(654→657) – 0.20(653→657) + 0.15(655→658) – 0.12(650→658)                                         |
| S <sub>4</sub>    | X <sup>1</sup> A <sub>g</sub> →2 <sup>1</sup> B <sub>3g</sub>  | 506 | 0    | 4.46  | 0.000 | 0.60(650→657) – 0.30(654→658) + 0.12[(648→657 – (653→658)]                                            |
| S <sub>5</sub>    | X <sup>1</sup> A <sub>g</sub> →1 <sup>1</sup> A <sub>g</sub>   | 501 | 0    | 0     | 0.000 | 0.66(651→657) – 0.18(652→657) – 0.12(649→658)                                                         |
| S <sub>6</sub>    | X <sup>1</sup> A <sub>g</sub> →2 <sup>1</sup> B <sub>2u</sub>  | 500 | 3.47 | 0     | 0.732 | 0.66(653→657) + 0.22(654→657)                                                                         |
| S <sub>7</sub>    | X <sup>1</sup> A <sub>g</sub> →2 <sup>1</sup> A <sub>g</sub>   | 490 | 0    | 0     | 0.000 | 0.65(652→657) + 0.18(656→658) – 0.17(651→657)                                                         |
| S <sub>8</sub>    | X <sup>1</sup> A <sub>g</sub> →3 <sup>1</sup> A <sub>g</sub>   | 481 | 0    | 0     | 0.000 | 0.67(656→658) – 0.19(652→657)                                                                         |
| S <sub>9</sub>    | X <sup>1</sup> A <sub>g</sub> →3 <sup>1</sup> B <sub>1u</sub>  | 479 | 0.32 | 0     | 0.006 | 0.66(649→657) + 0.22(651→658)                                                                         |
| S <sub>10</sub>   | X <sup>1</sup> A <sub>g</sub> →3 <sup>1</sup> B <sub>3g</sub>  | 462 | 0    | 0.42  | 0.000 | 0.65(648→657) + 0.15(654→658) – 0.11(655→657) + 0.10(653→658)                                         |
| S <sub>11</sub>   | X <sup>1</sup> A <sub>g</sub> →2 <sup>1</sup> B <sub>2u</sub>  | 459 | 2.48 | 0     | 0.407 | 0.67(655→658) – 0.12[(654→657) + (653→657)]                                                           |
| S <sub>12</sub>   | X <sup>1</sup> A <sub>g</sub> →4 <sup>1</sup> B <sub>3g</sub>  | 458 | 0    | 0     | 0.000 | 0.61(654→658) + 0.33(650→657) – 0.10(648→657)                                                         |
| S <sub>13</sub>   | X <sup>1</sup> A <sub>g</sub> →3 <sup>1</sup> B <sub>2u</sub>  | 444 | 0.33 | 0     | 0.007 | 0.48(647→657) + 0.44(650→658) + 0.14(644→657)]                                                        |
| S <sub>14</sub>   | X <sup>1</sup> A <sub>g</sub> →5 <sup>1</sup> B <sub>3g</sub>  | 443 | 0    | 7.29  | 0.000 | 0.62(653→658) – 0.23(656→660) + 0.14(655→657) – 0.11[(650→657) – (655→659)]                           |
| S <sub>15</sub>   | X <sup>1</sup> A <sub>g</sub> →4 <sup>1</sup> A <sub>g</sub>   | 436 | 0    | 0     | 0.000 | 0.59(646→657) – 0.31(649→658) – 0.12(651→659)                                                         |
| S <sub>16</sub>   | X <sup>1</sup> A <sub>g</sub> →4 <sup>1</sup> B <sub>1u</sub>  | 435 | 2.52 | 0     | 0.443 | 0.59(652→658) + 0.31(651→658) + 0.15(645→657)                                                         |
| S <sub>17</sub>   | X <sup>1</sup> A <sub>g</sub> →5 <sup>1</sup> B <sub>1u</sub>  | 430 | 0.39 | 0     | 0.150 | 0.53(651→658) – 0.32(652→658) – 0.23(649→657) + 0.17(645→657) + 0.11(649→659)                         |
| S <sub>18</sub>   | X <sup>1</sup> A <sub>g</sub> →6 <sup>1</sup> B <sub>3g</sub>  | 427 | 0    | 1.80  | 0.000 | 0.63(656→660) + 0.22(653→658) – 0.14(648→657)                                                         |
| S <sub>19</sub>   | X <sup>1</sup> A <sub>g</sub> →4 <sup>1</sup> B <sub>2u</sub>  | 423 | 0.45 | 0     | 0.015 | 0.48[(647→657) – (650→658)] – 0.10(656→661)                                                           |
| S <sub>20</sub>   | X <sup>1</sup> A <sub>g</sub> →6 <sup>1</sup> B <sub>1u</sub>  | 419 | 0.42 | 0     | 0.013 | 0.60(645→657) – 0.26(656→659) – 0.22(651→658)                                                         |

|                   |                                                                |     |      |       |       |                                                                                                                                                              |
|-------------------|----------------------------------------------------------------|-----|------|-------|-------|--------------------------------------------------------------------------------------------------------------------------------------------------------------|
| S <sub>21</sub>   | X <sup>1</sup> A <sub>g</sub> →5 <sup>1</sup> B <sub>2u</sub>  | 418 | 0.85 | 0     | 0.053 | 0.58(644→657) + 0.28(648→658) – 0.13(656→661) –<br>– 0.11(647→657) – 0.10(650→658)                                                                           |
| S <sub>22</sub>   | X <sup>1</sup> A <sub>g</sub> →5 <sup>1</sup> A <sub>g</sub>   | 416 | 0    | 0     | 0.000 | 0.57(649→658) + 0.33(646→657) – 0.16(651→657)                                                                                                                |
| S <sub>23</sub>   | X <sup>1</sup> A <sub>g</sub> →7 <sup>1</sup> B <sub>1u</sub>  | 414 | 0.26 | 0     | 0.005 | 0.60(656→659) + 0.23(645→657) – 0.17(643→657) +<br>+ 0.11(655→660) – 0.10(646→658)                                                                           |
| S <sub>24</sub>   | X <sup>1</sup> A <sub>g</sub> →6 <sup>1</sup> B <sub>2u</sub>  | 409 | 0.24 | 0     | 0.005 | 0.59(656→661) – 0.21(652→660) + 0.18(648→658) –<br>– 0.15(650→658) + 0.13(653→659)                                                                           |
| S <sub>25</sub>   | X <sup>1</sup> A <sub>g</sub> →8 <sup>1</sup> B <sub>1u</sub>  | 408 | 1.90 | 0     | 0.270 | 0.52(643→657) + 0.25(646→658) – 0.23(655→660) +<br>+ 0.20(656→659)                                                                                           |
| S <sub>26</sub>   | X <sup>1</sup> A <sub>g</sub> →7 <sup>1</sup> B <sub>2u</sub>  | 406 | 1.15 | 0     | 0.100 | 0.54(648→658) – 0.32(644→657) – 0.19(656→661) +<br>+ 0.14(653→659) + 0.11(654→659) + 0.10(655→662)                                                           |
| S <sub>27</sub>   | X <sup>1</sup> A <sub>g</sub> →7 <sup>1</sup> B <sub>3g</sub>  | 405 | 0    | 0.36  | 0.000 | 0.55(655→659) + 0.19[(647→658) – (642→657)] –<br>– 0.16(640→657) + 0.14(650→659)                                                                             |
| S <sub>28</sub>   | X <sup>1</sup> A <sub>g</sub> →9 <sup>1</sup> B <sub>1u</sub>  | 400 | 2.57 | 0     | 0.501 | 0.62(655→660) + 0.23(643→657) + 0.12(653→661)                                                                                                                |
| S <sub>29</sub>   | X <sup>1</sup> A <sub>g</sub> →6 <sup>1</sup> A <sub>g</sub>   | 399 | 0    | 0     | 0.000 | 0.61(654→660) – 0.18(656→662) – 0.15(655→661) –<br>– 0.13(641→657)                                                                                           |
| S <sub>30</sub>   | X <sup>1</sup> A <sub>g</sub> →8 <sup>1</sup> B <sub>3g</sub>  | 398 | 0    | 2.26  | 0.000 | 0.35(642→657) – 0.32(647→658) + 0.29(656→663) +<br>+ 0.28(655→659) + 0.15(640→657)                                                                           |
| <b>Compound 5</b> |                                                                |     |      |       |       |                                                                                                                                                              |
| T <sub>1</sub>    | X <sup>1</sup> A <sub>1g</sub> →1 <sup>3</sup> A <sub>2g</sub> | 674 | 0    | 0     | 0.000 | 0.62(1280→1281) + 0.21[(1278→1282) +<br>+ (1279→1283)]                                                                                                       |
| T <sub>2(3)</sub> | X <sup>1</sup> A <sub>1g</sub> →1 <sup>3</sup> E <sub>2u</sub> | 640 | 0    | 0     | 0.000 | 0.42(1278,1279→1281) + 0.37(1280→1282,1283) +<br>+ 0.25[(1279→1281) – (1278→1281)] +<br>+ 0.22[(1280→1283) – (1280→1282)]                                    |
| S <sub>1</sub>    | X <sup>1</sup> A <sub>1g</sub> →1 <sup>1</sup> A <sub>2g</sub> | 641 | 0    | 15.61 | 0.000 | 0.67(1280→1281) + 0.15[(1278→1282) +<br>+ (1279→1283)]                                                                                                       |
| S <sub>2(3)</sub> | X <sup>1</sup> A <sub>1g</sub> →1 <sup>1</sup> E <sub>2u</sub> | 569 | 5.73 | 0     | 1.757 | 0.62(1278,1279→1281) + 0.33(1280→1282,1283)]                                                                                                                 |
| S <sub>4(5)</sub> | X <sup>1</sup> A <sub>1g</sub> →1 <sup>1</sup> E <sub>1g</sub> | 568 | 0    | 10.00 | 0.000 | 0.60(1276,1277→1281) – 0.25[(1277→1281) +<br>+ (1276→1281)] + 0.14[(1272→1283) –<br>– (1272→1282)] + 0.13[(1274→1283) –<br>– (1274→1282) – (1275→1282,1283)] |

$\mu_z$  – magnetic dipole moment along the x axis ( $\beta$  – Bohr magneton);

$M_{xy}$  – electric dipole moment along the xy plane;

$\lambda$  – wavelength;

$f_{vac}$  – oscillator strength, calculating in the vacuum.

**Table S2.** Calculated parameters and assignment of the vertical electronic transitions in the electronic absorption spectrum of the **1D ribbons** at the B3LYP/3–21G Level

| 1D ribbons      | State                                                         | Transition                                                    | $\lambda$ , nm | $M_x$ , a.u. | $\mu_z$ , $\beta$ | $f$                                                                         | Assignment<br>(in vacuum approximation)                                                     |
|-----------------|---------------------------------------------------------------|---------------------------------------------------------------|----------------|--------------|-------------------|-----------------------------------------------------------------------------|---------------------------------------------------------------------------------------------|
| n = 2           | T <sub>1</sub>                                                | X <sup>1</sup> A <sub>g</sub> →1 <sup>3</sup> B <sub>1u</sub> | 446            | 0            | 0                 | 0.000                                                                       | 0.60(173→177) + 0.29(174→178) – 0.10(175→180)                                               |
|                 | T <sub>2</sub>                                                | X <sup>1</sup> A <sub>g</sub> →1 <sup>3</sup> A <sub>g</sub>  | 424            | 0            | 0                 | 0.000                                                                       | 0.47(176→178) + 0.44(172→177) + 0.15(170→177)                                               |
|                 | S <sub>1</sub>                                                | X <sup>1</sup> A <sub>g</sub> →1 <sup>1</sup> B <sub>2u</sub> | 433            | 3.40         | 0                 | 0.809                                                                       | 0.69(176→177) + 0.14(175→179)                                                               |
|                 | S <sub>2</sub>                                                | X <sup>1</sup> A <sub>g</sub> →1 <sup>1</sup> B <sub>1u</sub> | 430            | 0.44         | 0                 | 0.014                                                                       | 0.69(175→177) + 0.11(174→178) + 0.10(173→177)                                               |
|                 | S <sub>3</sub>                                                | X <sup>1</sup> A <sub>g</sub> →1 <sup>1</sup> B <sub>3g</sub> | 394            | 0            | 4.03              | 0.000                                                                       | 0.68(174→177) + 0.13(175→178)                                                               |
|                 | S <sub>4</sub>                                                | X <sup>1</sup> A <sub>g</sub> →2 <sup>1</sup> B <sub>1u</sub> | 371            | 1.60         | 0                 | 0.210                                                                       | 0.69(173→177)                                                                               |
|                 | S <sub>5</sub>                                                | X <sup>1</sup> A <sub>g</sub> →1 <sup>1</sup> A <sub>g</sub>  | 352            | 0            | 0                 | 0.000                                                                       | 0.56(172→177) – 0.42(176→178)                                                               |
|                 | S <sub>6</sub>                                                | X <sup>1</sup> A <sub>g</sub> →2 <sup>1</sup> B <sub>2u</sub> | 349            | 0.93         | 0                 | 0.076                                                                       | 0.69(171→177)                                                                               |
|                 | S <sub>7</sub>                                                | X <sup>1</sup> A <sub>g</sub> →2 <sup>1</sup> A <sub>g</sub>  | 346            | 0            | 0                 | 0.000                                                                       | 0.56(176→178) + 0.38(172→177) – 0.17(170→177)                                               |
|                 | S <sub>8</sub>                                                | X <sup>1</sup> A <sub>g</sub> →2 <sup>1</sup> B <sub>3g</sub> | 345            | 0            | 2.23              | 0.000                                                                       | 0.66(175→178) + 0.18(169→177) – 0.15(174→177)                                               |
|                 | S <sub>9</sub>                                                | X <sup>1</sup> A <sub>g</sub> →3 <sup>1</sup> A <sub>g</sub>  | 331            | 0            | 0                 | 0.000                                                                       | 0.66(170→177) + 0.15(172→177) + 0.11(174→179)                                               |
|                 | S <sub>10</sub>                                               | X <sup>1</sup> A <sub>g</sub> →3 <sup>1</sup> B <sub>3g</sub> | 317            | 0            | 0.27              | 0.000                                                                       | 0.66(169→177) + 0.15(173→178) – 0.19(175→178)                                               |
|                 | S <sub>11</sub>                                               | X <sup>1</sup> A <sub>g</sub> →3 <sup>1</sup> B <sub>1u</sub> | 313            | 0.13         | 0                 | 0.002                                                                       | 0.67(176→179) + 0.18(174→178)                                                               |
|                 | S <sub>12</sub>                                               | X <sup>1</sup> A <sub>g</sub> →4 <sup>1</sup> B <sub>1u</sub> | 309            | 1.48         | 0                 | 0.215                                                                       | 0.66(174→178) – 0.16(176→179) – 0.11(175→177)                                               |
|                 | S <sub>13</sub>                                               | X <sup>1</sup> A <sub>g</sub> →3 <sup>1</sup> B <sub>2u</sub> | 305            | 3.25         | 0                 | 1.050                                                                       | 0.56(175→179) + 0.23(168→177) + 0.16(176→180) – 0.13(173→179) – 0.12[(176→177) – (172→178)] |
| S <sub>14</sub> | X <sup>1</sup> A <sub>g</sub> →4 <sup>1</sup> B <sub>3g</sub> | 304                                                           | 0              | 2.40         | 0.000             | 0.68(173→178) – 0.13(169→177)                                               |                                                                                             |
| S <sub>15</sub> | X <sup>1</sup> A <sub>g</sub> →4 <sup>1</sup> B <sub>2u</sub> | 298                                                           | 1.08           | 0            | 0.119             | 0.63(168→177) – 0.17(176→180) – 0.21(175→179)                               |                                                                                             |
| n = 3           | T <sub>1</sub>                                                | X <sup>1</sup> A <sub>g</sub> →1 <sup>3</sup> A <sub>g</sub>  | 491            | 0            | 0                 | 0.000                                                                       | 0.52(258→261) + 0.44(260→262)                                                               |
|                 | T <sub>2</sub>                                                | X <sup>1</sup> A <sub>g</sub> →1 <sup>3</sup> B <sub>3g</sub> | 467            | 0            | 0                 | 0.000                                                                       | 0.48(256→261) – 0.30(255→262) – 0.24(257→262) + 0.18(259→263) – 0.16(256→263)               |
|                 | S <sub>1</sub>                                                | X <sup>1</sup> A <sub>g</sub> →1 <sup>1</sup> B <sub>1u</sub> | 474            | 4.94         | 0                 | 1.563                                                                       | 0.70(260→261)                                                                               |
|                 | S <sub>2</sub>                                                | X <sup>1</sup> A <sub>g</sub> →1 <sup>1</sup> B <sub>3g</sub> | 443            | 0            | 0.13              | 0.000                                                                       | 0.69(259→261) + 0.13(257→262)                                                               |
|                 | S <sub>3</sub>                                                | X <sup>1</sup> A <sub>g</sub> →1 <sup>1</sup> B <sub>2u</sub> | 419            | 0.59         | 0                 | 0.025                                                                       | 0.65(257→261) + 0.18(259→262) – 0.14(256→262)                                               |
|                 | S <sub>4</sub>                                                | X <sup>1</sup> A <sub>g</sub> →1 <sup>1</sup> A <sub>g</sub>  | 406            | 0            | 0                 | 0.000                                                                       | 0.68(258→261) + 0.11(259→265)                                                               |
|                 | S <sub>5</sub>                                                | X <sup>1</sup> A <sub>g</sub> →2 <sup>1</sup> A <sub>g</sub>  | 400            | 0            | 0                 | 0.000                                                                       | 0.70(260→262)                                                                               |
|                 | S <sub>6</sub>                                                | X <sup>1</sup> A <sub>g</sub> →2 <sup>1</sup> B <sub>3g</sub> | 394            | 0            | 4.99              | 0.000                                                                       | 0.65(256→261) – 0.21(257→262) – 0.10(255→262)                                               |
|                 | S <sub>7</sub>                                                | X <sup>1</sup> A <sub>g</sub> →2 <sup>1</sup> B <sub>2u</sub> | 382            | 1.40         | 0                 | 0.155                                                                       | 0.60(255→261) + 0.28(259→262) – 0.19(257→261)                                               |
|                 | S <sub>8</sub>                                                | X <sup>1</sup> A <sub>g</sub> →3 <sup>1</sup> B <sub>2u</sub> | 372            | 0.99         | 0                 | 0.079                                                                       | 0.60(259→262) – 0.32(255→261) – 0.13(257→263) – 0.12(257→261)                               |
| S <sub>9</sub>  | X <sup>1</sup> A <sub>g</sub> →2 <sup>1</sup> B <sub>3g</sub> | 363                                                           | 0              | 1.99         | 0.000             | 0.62(257→262) + 0.23(256→261) – 0.15(259→263) – 0.11[(259→261) – (250→261)] |                                                                                             |
| S <sub>10</sub> | X <sup>1</sup> A <sub>g</sub> →4 <sup>1</sup> B <sub>1u</sub> | 355                                                           | 0.14           | 0            | 0.002             | 0.54(254→261) + 0.39(258→262) – 0.16(253→262)                               |                                                                                             |
| n = 4           | T <sub>1</sub>                                                | X <sup>1</sup> A <sub>g</sub> →1 <sup>3</sup> A <sub>g</sub>  | 526            | 0            | 0                 | 0.000                                                                       | 0.50(343→345) + 0.44(344→346) – 0.13(339→346)                                               |

|       |                 |                                                               |     |      |      |       |                                                                                                                                               |
|-------|-----------------|---------------------------------------------------------------|-----|------|------|-------|-----------------------------------------------------------------------------------------------------------------------------------------------|
|       | T <sub>2</sub>  | X <sup>1</sup> A <sub>g</sub> →1 <sup>3</sup> B <sub>1u</sub> | 499 | 0    | 0    | 0.000 | 0.49(340→345) + 0.29(341→346) + 0.22(342→347) + 0.14(338→346)                                                                                 |
|       | S <sub>1</sub>  | X <sup>1</sup> A <sub>g</sub> →1 <sup>1</sup> B <sub>2u</sub> | 498 | 6.16 | 0    | 2.320 | 0.69(344→345) + 0.12(343→346)                                                                                                                 |
|       | S <sub>2</sub>  | X <sup>1</sup> A <sub>g</sub> →1 <sup>1</sup> B <sub>1u</sub> | 449 | 0.15 | 0    | 0.002 | 0.67(342→345) - 0.18(341→346)                                                                                                                 |
|       | S <sub>3</sub>  | X <sup>1</sup> A <sub>g</sub> →1 <sup>1</sup> A <sub>g</sub>  | 437 | 0    | 0.50 | 0.000 | 0.62(343→345) + 0.30(344→346)                                                                                                                 |
|       | S <sub>4</sub>  | X <sup>1</sup> A <sub>g</sub> →1 <sup>1</sup> B <sub>3g</sub> | 432 | 0    | 0    | 0.000 | 0.63(341→345) - 0.25(342→346) + 0.12(340→346)                                                                                                 |
|       | S <sub>5</sub>  | X <sup>1</sup> A <sub>g</sub> →2 <sup>1</sup> A <sub>g</sub>  | 430 | 0    | 0    | 0.000 | 0.63(344→346) - 0.31(343→345)                                                                                                                 |
|       | S <sub>6</sub>  | X <sup>1</sup> A <sub>g</sub> →2 <sup>1</sup> B <sub>1u</sub> | 411 | 0.72 | 0    | 0.038 | 0.62(340→345) + 0.23(341→346) + 0.16(338→346)                                                                                                 |
|       | S <sub>7</sub>  | X <sup>1</sup> A <sub>g</sub> →2 <sup>1</sup> B <sub>2u</sub> | 397 | 2.00 | 0    | 0.306 | 0.53(343→346) - 0.42(339→345) + 0.11(342→351)                                                                                                 |
|       | S <sub>8</sub>  | X <sup>1</sup> A <sub>g</sub> →2 <sup>1</sup> B <sub>3g</sub> | 393 | 0    | 5.23 | 0.000 | 0.54(338→345) - 0.28(342→346) + 0.19[(340→346) - (341→345)] - 0.16(337→346) - 0.15(341→347)                                                   |
|       | S <sub>9</sub>  | X <sup>1</sup> A <sub>g</sub> →3 <sup>1</sup> B <sub>2u</sub> | 390 | 1.24 | 0    | 0.121 | 0.53(339→345) - 0.16(344→347) + 0.41(343→346)                                                                                                 |
|       | S <sub>10</sub> | X <sup>1</sup> A <sub>g</sub> →3 <sup>1</sup> B <sub>3g</sub> | 389 | 0    | 3.03 | 0.000 | 0.57(342→346) + 0.27(338→345) + 0.23(340→346)                                                                                                 |
| n = 9 | T <sub>1</sub>  | X <sup>1</sup> A <sub>g</sub> →1 <sup>3</sup> A <sub>g</sub>  | 540 | 0    | 0    | 0.000 | 0.34(761→765) - 0.33(762→766) + 0.28(764→768) - 0.31(764→768)                                                                                 |
|       | T <sub>2</sub>  | X <sup>1</sup> A <sub>g</sub> →1 <sup>3</sup> B <sub>1u</sub> | 517 | 0    | 0    | 0.000 | 0.30[(757→765) + (762→767) - (761→766)] - 0.27(763→768) - 0.23(764→769)                                                                       |
|       | S <sub>1</sub>  | X <sup>1</sup> A <sub>g</sub> →1 <sup>1</sup> B <sub>1u</sub> | 534 | 10.6 | 0    | 6.340 | 0.62(764→765) + 0.27(763→766) + 0.14(762→767)                                                                                                 |
|       | S <sub>2</sub>  | X <sup>1</sup> A <sub>g</sub> →1 <sup>1</sup> A <sub>g</sub>  | 506 | 0    | 0    | 0.000 | 0.50(763→765) + 0.44(764→766) + 0.15(762→766)                                                                                                 |
|       | S <sub>3</sub>  | X <sup>1</sup> A <sub>g</sub> →2 <sup>1</sup> B <sub>1u</sub> | 479 | 3.11 | 0    | 0.612 | 0.45(763→766) + 0.41(762→765) + 0.29(764→767)                                                                                                 |
|       | S <sub>4</sub>  | X <sup>1</sup> A <sub>g</sub> →2 <sup>1</sup> A <sub>g</sub>  | 473 | 0    | 0    | 0.000 | 0.50(764→766) - 0.44(763→765) + 0.14(763→767) - 0.12(762→766)                                                                                 |
|       | S <sub>5</sub>  | X <sup>1</sup> A <sub>g</sub> →3 <sup>1</sup> B <sub>1u</sub> | 458 | 1.58 | 0    | 0.166 | 0.53(762→765) - 0.30(763→766) + 0.21(764→765) - 0.20(764→767) - 0.13(761→766)                                                                 |
|       | S <sub>6</sub>  | X <sup>1</sup> A <sub>g</sub> →1 <sup>1</sup> B <sub>3g</sub> | 456 | 0    | 0.20 | 0.000 | 0.54(760→765) - 0.28(759→766) + 0.23(758→765) - 0.18(758→767) + 0.12(756→766)                                                                 |
|       | S <sub>7</sub>  | X <sup>1</sup> A <sub>g</sub> →3 <sup>1</sup> A <sub>g</sub>  | 455 | 0    | 0    | 0.000 | 0.47(762→766) - 0.30(761→765) + 0.35(763→767) - 0.15(764→768) - 0.10(763→765)                                                                 |
|       | S <sub>8</sub>  | X <sup>1</sup> A <sub>g</sub> →4 <sup>1</sup> B <sub>1u</sub> | 453 | 1.47 | 0    | 0.146 | 0.58(764→767) - 0.29(763→766) + 0.22(764→765) - 0.14(763→768)                                                                                 |
|       | S <sub>9</sub>  | X <sup>1</sup> A <sub>g</sub> →1 <sup>1</sup> B <sub>2u</sub> | 452 | 0.09 | 0    | 0.001 | 0.46(759→765) - 0.40(760→766) + 0.16(759→767) - 0.18(756→765) + 0.12(758→766)                                                                 |
|       | S <sub>10</sub> | X <sup>1</sup> A <sub>g</sub> →2 <sup>1</sup> B <sub>3g</sub> | 445 | 0    | 0.70 | 0.000 | 0.47(758→765) + 0.35(759→766) - 0.26(760→767) + 0.15(755→765) + 0.13(756→766)                                                                 |
| n=16  | T <sub>1</sub>  | X <sup>1</sup> A <sub>g</sub> →1 <sup>3</sup> A <sub>g</sub>  | 591 | 0    | 0    | 0.000 | 0.36(1352→1354) - 0.35(1351→1353) + 0.19(1351→1355) - 0.17(1350→1354) - 0.14(1350→1356) + 0.13(1349→1355) + 0.12(1349→1353) + 0.11(1349→1357) |
|       | T <sub>2</sub>  | X <sup>1</sup> A <sub>g</sub> →1 <sup>3</sup> B <sub>2u</sub> | 585 | 0    | 0    | 0.000 | 0.32(1350→1353) + 0.32(1353→1355) + 0.28(1351→1354) + 0.15(1351→1356) +                                                                       |

|                |                                                                |     |           |   |            |  |                                                                                                                                                                                                                   |
|----------------|----------------------------------------------------------------|-----|-----------|---|------------|--|-------------------------------------------------------------------------------------------------------------------------------------------------------------------------------------------------------------------|
|                |                                                                |     |           |   |            |  | $+ 0.14(1349 \rightarrow 1354) + 0.11[(1348 \rightarrow 1355) - (1350 \rightarrow 1357) + (1348 \rightarrow 1353)]$                                                                                               |
| S <sub>1</sub> | X <sup>1</sup> A <sub>g</sub> → 1 <sup>1</sup> B <sub>2u</sub> | 543 | 14.7<br>6 | 0 | 12.18<br>9 |  | $0.51(1352 \rightarrow 1353) - 0.32(1351 \rightarrow 1354) + 0.23(1350 \rightarrow 1355) - 0.16(1349 \rightarrow 1356) - 0.11(1348 \rightarrow 1357) + 0.10(1350 \rightarrow 1353)$                               |
| S <sub>2</sub> | X <sup>1</sup> A <sub>g</sub> → 1 <sup>1</sup> A <sub>g</sub>  | 530 | 4.06      | 0 | 0.000      |  | $0.40[(1351 \rightarrow 1353) - (1352 \rightarrow 1354)] - 0.21(1351 \rightarrow 1355) + 0.19(1350 \rightarrow 1354) + 0.13(1350 \rightarrow 1356) - 0.12(1349 \rightarrow 1355)$                                 |
| S <sub>3</sub> | X <sup>1</sup> A <sub>g</sub> → 2 <sup>1</sup> B <sub>2u</sub> | 514 | 0         | 0 | 0.974      |  | $0.38(1350 \rightarrow 1353) + 0.32(1351 \rightarrow 1354) + 0.35(1352 \rightarrow 1355) + 0.15(1349 \rightarrow 1354) + 0.14(1351 \rightarrow 1356) + 0.11[(1352 \rightarrow 1353) - (1350 \rightarrow 1355)]$   |
| S <sub>4</sub> | X <sup>1</sup> A <sub>g</sub> → 2 <sup>1</sup> A <sub>g</sub>  | 499 | 0         | 0 | 0.000      |  | $0.34(1349 \rightarrow 1353) + 0.33(1350 \rightarrow 1354) - 0.30(1351 \rightarrow 1355) - 0.28(1352 \rightarrow 1356) - 0.12(1348 \rightarrow 1354) - 0.11(1351 \rightarrow 1353)$                               |
| S <sub>5</sub> | X <sup>1</sup> A <sub>g</sub> → 3 <sup>1</sup> B <sub>2u</sub> | 485 | 2.45      | 0 | 0.376      |  | $0.33(1350 \rightarrow 1355) - 0.32(1349 \rightarrow 1354) + 0.33(1350 \rightarrow 1355) - 0.27(1351 \rightarrow 1356) - 0.21(1352 \rightarrow 1357) + 0.11(1351 \rightarrow 1354)$                               |
| S <sub>6</sub> | X <sup>1</sup> A <sub>g</sub> → 3 <sup>1</sup> A <sub>g</sub>  | 481 | 0         | 0 | 0.000      |  | $0.43[(1352 \rightarrow 1354) + (1351 \rightarrow 1353)] + 0.21(1350 \rightarrow 1354) + 0.20(1351 \rightarrow 1355) - 0.11(1350 \rightarrow 1356) + 0.10(1349 \rightarrow 1355)$                                 |
| S <sub>7</sub> | X <sup>1</sup> A <sub>g</sub> → 4 <sup>1</sup> B <sub>2u</sub> | 476 | 0.86      | 0 | 0.047      |  | $0.47(1350 \rightarrow 1353) - 0.37(1352 \rightarrow 1355) + 0.21(1349 \rightarrow 1354) - 0.19(1352 \rightarrow 1353) - 0.14(1351 \rightarrow 1354) - 0.13(1351 \rightarrow 1356) + 0.10(1348 \rightarrow 1355)$ |

$\mu_z$  – magnetic dipole moment along the  $z$  axis ( $\beta$  – Bohr magneton);

$M_x$  – electric dipole moment along the  $x$  axis;

$\lambda$  – wavelength;

$f_{vac}$  – oscillator strength, calculating in a vacuum.

**Table S3.** Total energy of the ground singlet state ( $^1A_{1g}$ ) of the compounds **1–5** at the B3LYP/6–21G(d) level of theory

| Compounds         | n  | $E_{tot}, a.u.$ |
|-------------------|----|-----------------|
| <b>1</b>          | 4  | –4563.5596      |
| <b>2</b>          | 9  | –10032.3719     |
| <b>3</b>          | 16 | –17625.8718     |
| <b>4</b>          | 8  | –8970.0279      |
| <b>5</b>          | 8  | –17625.6829     |
| <b>1D ribbons</b> | 2  | –2360.3252      |
|                   | 3  | –3501.2146      |
|                   | 4  | –4642.1048      |
|                   | 9  | –10346.5556     |
|                   | 16 | –18332.7859     |

The 6-21G(d) double-valence split basis set affords us to optimize all studied systems which consist at the most of 486 atoms (TOC ribbon, n=16). The extension of the chosen basis set prevents optimization of all studied molecules at the uniform level of accuracy. For comparison we have optimized the sheet **1** with the 6-311++G(d,p) basis. The calculated deviations in the structural parameters are negligible (no more than 0.002 Å for the bond lengths) and all conclusions remain. Thus, the choice of the 6-21G(d) basis set is quite justified by a very big size of the studied systems.

**Table S4.** The optimized Cartesian coordinates of the compound **1** calculated at the B3LYP/6–21G(d) level of theory

| Center<br>Number | Atomic<br>Number | Coordinates (Angstroms) |           |           |
|------------------|------------------|-------------------------|-----------|-----------|
|                  |                  | X                       | Y         | Z         |
| 1                | 6                | 1.694016                | 6.648979  | -0.210859 |
| 2                | 6                | 0.710768                | 7.636484  | -0.088471 |
| 3                | 6                | -0.710768               | 7.636484  | 0.088471  |
| 4                | 6                | -1.694016               | 6.648979  | 0.210859  |
| 5                | 6                | -1.701891               | 5.216925  | 0.211839  |
| 6                | 6                | -0.710724               | 4.218849  | 0.088466  |
| 7                | 6                | 0.710724                | 4.218849  | -0.088466 |
| 8                | 6                | 1.701891                | 5.216925  | -0.211839 |
| 9                | 6                | 1.091836                | 2.877940  | -0.135904 |
| 10               | 6                | -1.091836               | 2.877940  | 0.135904  |
| 11               | 6                | -3.034449               | 4.839613  | 0.377706  |
| 12               | 6                | -3.031207               | 7.048413  | 0.377302  |
| 13               | 6                | -1.099016               | 8.986043  | 0.136797  |
| 14               | 6                | 1.099016                | 8.986043  | -0.136797 |
| 15               | 6                | 3.031207                | 7.048413  | -0.377302 |
| 16               | 6                | 3.034449                | 4.839613  | -0.377706 |
| 17               | 8                | 0.000000                | 2.041179  | 0.000000  |
| 18               | 8                | -3.864006               | 5.940194  | 0.480963  |
| 19               | 6                | -3.419942               | 8.392929  | 0.425689  |
| 20               | 6                | -2.433238               | 9.382426  | 0.302871  |
| 21               | 8                | 0.000000                | 9.824002  | 0.000000  |
| 22               | 6                | 2.433238                | 9.382426  | -0.302871 |
| 23               | 6                | 3.419942                | 8.392929  | -0.425689 |
| 24               | 8                | 3.864006                | 5.940194  | -0.480963 |
| 25               | 1                | -4.463562               | 8.663949  | 0.555591  |
| 26               | 1                | -2.698177               | 10.435146 | 0.335849  |
| 27               | 1                | 2.698177                | 10.435146 | -0.335849 |
| 28               | 1                | 4.463562                | 8.663949  | -0.555591 |
| 29               | 6                | -4.186542               | 0.716209  | 0.521110  |
| 30               | 6                | -5.176974               | 1.715024  | 0.644391  |
| 31               | 6                | -6.598062               | 1.707089  | 0.821278  |
| 32               | 6                | -7.578005               | 0.716253  | 0.943254  |
| 33               | 6                | -7.578005               | -0.716253 | 0.943254  |
| 34               | 6                | -6.598062               | -1.707089 | 0.821278  |
| 35               | 6                | -5.176974               | -1.715024 | 0.644391  |
| 36               | 6                | -4.186542               | -0.716209 | 0.521110  |
| 37               | 6                | -4.802552               | -3.057866 | 0.597786  |
| 38               | 6                | -6.994438               | -3.054599 | 0.870616  |
| 39               | 6                | -8.917229               | -1.107497 | 1.109951  |
| 40               | 6                | -8.917229               | 1.107497  | 1.109951  |
| 41               | 6                | -6.994438               | 3.054599  | 0.870616  |
| 42               | 6                | -4.802552               | 3.057866  | 0.597786  |
| 43               | 6                | -2.855901               | 1.100261  | 0.355481  |
| 44               | 6                | -2.855901               | -1.100261 | 0.355481  |
| 45               | 6                | -3.459239               | -3.485933 | 0.430580  |
| 46               | 8                | -5.894705               | -3.893825 | 0.733729  |
| 47               | 6                | -8.328658               | -3.446334 | 1.036690  |
| 48               | 6                | -9.310577               | -2.452015 | 1.158912  |
| 49               | 8                | -9.748772               | 0.000000  | 1.213455  |
| 50               | 6                | -9.310577               | 2.452015  | 1.158912  |
| 51               | 6                | -8.328658               | 3.446334  | 1.036690  |
| 52               | 8                | -5.894705               | 3.893825  | 0.733729  |
| 53               | 6                | -3.459239               | 3.485933  | 0.430580  |
| 54               | 6                | -2.433819               | 2.452601  | 0.302944  |
| 55               | 8                | -2.025548               | 0.000000  | 0.252125  |
| 56               | 1                | -8.597602               | -4.498008 | 1.070166  |
| 57               | 1                | -10.355235              | -2.718999 | 1.288943  |
| 58               | 1                | -10.355235              | 2.718999  | 1.288943  |
| 59               | 1                | -8.597602               | 4.498008  | 1.070166  |
| 60               | 6                | 7.578005                | 0.716253  | -0.943254 |
| 61               | 6                | 6.598062                | 1.707089  | -0.821278 |
| 62               | 6                | 5.176974                | 1.715024  | -0.644391 |
| 63               | 6                | 4.186542                | 0.716209  | -0.521110 |
| 64               | 6                | 4.186542                | -0.716209 | -0.521110 |
| 65               | 6                | 5.176974                | -1.715024 | -0.644391 |
| 66               | 6                | 6.598062                | -1.707089 | -0.821278 |
| 67               | 6                | 7.578005                | -0.716253 | -0.943254 |
| 68               | 6                | 6.994438                | -3.054599 | -0.870616 |
| 69               | 6                | 4.802552                | -3.057866 | -0.597786 |
| 70               | 6                | 2.855901                | -1.100261 | -0.355481 |



|     |   |           |            |           |
|-----|---|-----------|------------|-----------|
| 71  | 6 | 2.855901  | 1.100261   | -0.355481 |
| 72  | 6 | 4.802552  | 3.057866   | -0.597786 |
| 73  | 6 | 6.994438  | 3.054599   | -0.870616 |
| 74  | 6 | 8.917229  | 1.107497   | -1.109951 |
| 75  | 6 | 8.917229  | -1.107497  | -1.109951 |
| 76  | 6 | 9.310577  | -2.452015  | -1.158912 |
| 77  | 6 | 8.328658  | -3.446334  | -1.036690 |
| 78  | 8 | 5.894705  | -3.893825  | -0.733729 |
| 79  | 8 | 2.025548  | 0.000000   | -0.252125 |
| 80  | 6 | 2.433819  | 2.452601   | -0.302944 |
| 81  | 6 | 3.459239  | 3.485933   | -0.430580 |
| 82  | 8 | 5.894705  | 3.893825   | -0.733729 |
| 83  | 6 | 8.328658  | 3.446334   | -1.036690 |
| 84  | 6 | 9.310577  | 2.452015   | -1.158912 |
| 85  | 8 | 9.748772  | 0.000000   | -1.213455 |
| 86  | 1 | 10.355235 | -2.718999  | -1.288943 |
| 87  | 1 | 8.597602  | -4.498008  | -1.070166 |
| 88  | 1 | 8.597602  | 4.498008   | -1.070166 |
| 89  | 1 | 10.355235 | 2.718999   | -1.288943 |
| 90  | 6 | 1.701891  | -5.216925  | -0.211839 |
| 91  | 6 | 0.710724  | -4.218849  | -0.088466 |
| 92  | 6 | -0.710724 | -4.218849  | 0.088466  |
| 93  | 6 | -1.701891 | -5.216925  | 0.211839  |
| 94  | 6 | -1.694016 | -6.648979  | 0.210859  |
| 95  | 6 | -0.710768 | -7.636484  | 0.088471  |
| 96  | 6 | 0.710768  | -7.636484  | -0.088471 |
| 97  | 6 | 1.694016  | -6.648979  | -0.210859 |
| 98  | 6 | 1.099016  | -8.986043  | -0.136797 |
| 99  | 6 | -1.099016 | -8.986043  | 0.136797  |
| 100 | 6 | -3.031207 | -7.048413  | 0.377302  |
| 101 | 6 | -3.034449 | -4.839613  | 0.377706  |
| 102 | 6 | -1.091836 | -2.877940  | 0.135904  |
| 103 | 6 | 1.091836  | -2.877940  | -0.135904 |
| 104 | 6 | 3.034449  | -4.839613  | -0.377706 |
| 105 | 6 | 3.031207  | -7.048413  | -0.377302 |
| 106 | 6 | 3.419942  | -8.392929  | -0.425689 |
| 107 | 6 | 2.433238  | -9.382426  | -0.302871 |
| 108 | 8 | 0.000000  | -9.824002  | 0.000000  |
| 109 | 6 | -2.433238 | -9.382426  | 0.302871  |
| 110 | 6 | -3.419942 | -8.392929  | 0.425689  |
| 111 | 8 | -3.864006 | -5.940194  | 0.480963  |
| 112 | 6 | -2.433819 | -2.452601  | 0.302944  |
| 113 | 8 | 0.000000  | -2.041179  | 0.000000  |
| 114 | 6 | 2.433819  | -2.452601  | -0.302944 |
| 115 | 6 | 3.459239  | -3.485933  | -0.430580 |
| 116 | 8 | 3.864006  | -5.940194  | -0.480963 |
| 117 | 1 | 4.463562  | -8.663949  | -0.555591 |
| 118 | 1 | 2.698177  | -10.435146 | -0.335849 |
| 119 | 1 | -2.698177 | -10.435146 | 0.335849  |
| 120 | 1 | -4.463562 | -8.663949  | 0.555591  |

**Table S5.** The optimized Cartesian coordinates of the compound **2** calculated at the B3LYP/6–21G(d) level of theory

| Center Number | Atomic Number | Coordinates (Angstroms) |            |          |
|---------------|---------------|-------------------------|------------|----------|
|               |               | X                       | Y          | Z        |
| 1             | 6             | 0.924107                | -10.003018 | 0.000000 |
| 2             | 6             | 1.410224                | -8.624757  | 0.000000 |
| 3             | 6             | 8.827468                | -12.755952 | 0.000000 |
| 4             | 6             | 7.822022                | -0.933115  | 0.000000 |
| 5             | 6             | 9.153432                | -1.402683  | 0.000000 |
| 6             | 6             | 9.763634                | -2.697780  | 0.000000 |
| 7             | 6             | 9.298132                | -4.018868  | 0.000000 |
| 8             | 6             | 8.010836                | -4.645358  | 0.000000 |
| 9             | 6             | 6.679156                | -4.176554  | 0.000000 |
| 10            | 6             | 6.061720                | -2.885277  | 0.000000 |
| 11            | 6             | 6.531483                | -1.552094  | 0.000000 |
| 12            | 6             | 4.685914                | -3.117717  | 0.000000 |
| 13            | 6             | 5.635866                | -5.102422  | 0.000000 |
| 14            | 6             | 8.249724                | -6.019677  | 0.000000 |
| 15            | 6             | 10.240284               | -5.062191  | 0.000000 |
| 16            | 6             | 11.151720               | -2.475545  | 0.000000 |
| 17            | 6             | 10.201099               | -0.481697  | 0.000000 |
| 18            | 6             | 7.589605                | 0.442264   | 0.000000 |
| 19            | 6             | 5.605298                | -0.508518  | 0.000000 |
| 20            | 6             | 4.201355                | -0.706399  | 0.000000 |
| 21            | 6             | 3.716142                | -2.083428  | 0.000000 |
| 22            | 8             | 4.406313                | -4.470763  | 0.000000 |
| 23            | 8             | 9.603804                | -6.297215  | 0.000000 |
| 24            | 6             | 11.623120               | -4.838943  | 0.000000 |
| 25            | 6             | 12.089146               | -3.516366  | 0.000000 |
| 26            | 8             | 11.430059               | -1.114326  | 0.000000 |
| 27            | 6             | 10.003018               | 0.924107   | 0.000000 |
| 28            | 6             | 8.624757                | 1.410224   | 0.000000 |
| 29            | 8             | 6.235670                | 0.720930   | 0.000000 |
| 30            | 6             | 5.031619                | -8.848279  | 0.000000 |
| 31            | 6             | 6.364144                | -9.316983  | 0.000000 |
| 32            | 6             | 6.975307                | -10.612120 | 0.000000 |
| 33            | 6             | 6.507781                | -11.930832 | 0.000000 |
| 34            | 6             | 5.215734                | -12.549585 | 0.000000 |
| 35            | 6             | 3.895229                | -12.087150 | 0.000000 |
| 36            | 6             | 3.269310                | -10.799079 | 0.000000 |
| 37            | 6             | 3.739486                | -9.467073  | 0.000000 |
| 38            | 6             | 1.895413                | -11.038951 | 0.000000 |
| 39            | 6             | 2.852568                | -13.029531 | 0.000000 |
| 40            | 6             | 5.445732                | -13.935650 | 0.000000 |
| 41            | 6             | 7.443491                | -12.978936 | 0.000000 |
| 42            | 6             | 8.363157                | -10.390546 | 0.000000 |
| 43            | 6             | 7.412312                | -8.396943  | 0.000000 |
| 44            | 6             | 2.814086                | -8.423746  | 0.000000 |
| 45            | 8             | 1.617039                | -12.392760 | 0.000000 |
| 46            | 6             | 3.080216                | -14.411471 | 0.000000 |
| 47            | 6             | 4.404402                | -14.874130 | 0.000000 |
| 48            | 8             | 6.806553                | -14.213080 | 0.000000 |
| 49            | 6             | 9.297127                | -11.434232 | 0.000000 |
| 50            | 8             | 8.641585                | -9.028750  | 0.000000 |
| 51            | 6             | 7.214112                | -6.990775  | 0.000000 |
| 52            | 8             | 3.444995                | -7.193655  | 0.000000 |
| 53            | 1             | 2.248976                | -15.110253 | 0.000000 |
| 54            | 1             | 4.618497                | -15.938770 | 0.000000 |
| 55            | 6             | 14.411471               | 3.080216   | 0.000000 |
| 56            | 6             | 10.612120               | 6.975307   | 0.000000 |
| 57            | 6             | 11.930832               | 6.507781   | 0.000000 |
| 58            | 6             | 12.549585               | 5.215734   | 0.000000 |
| 59            | 6             | 12.087150               | 3.895229   | 0.000000 |
| 60            | 6             | 10.799079               | 3.269310   | 0.000000 |
| 61            | 6             | 9.467073                | 3.739486   | 0.000000 |
| 62            | 6             | 8.848279                | 5.031619   | 0.000000 |
| 63            | 6             | 9.316983                | 6.364144   | 0.000000 |
| 64            | 6             | 7.473241                | 4.798879   | 0.000000 |
| 65            | 6             | 8.423746                | 2.814086   | 0.000000 |
| 66            | 6             | 11.038951               | 1.895413   | 0.000000 |
| 67            | 6             | 13.029531               | 2.852568   | 0.000000 |
| 68            | 6             | 13.935650               | 5.445732   | 0.000000 |
| 69            | 6             | 12.978936               | 7.443491   | 0.000000 |
| 70            | 6             | 10.390546               | 8.363157   | 0.000000 |

|     |   |            |            |          |
|-----|---|------------|------------|----------|
| 71  | 6 | 8.396943   | 7.412312   | 0.000000 |
| 72  | 6 | 6.990775   | 7.214112   | 0.000000 |
| 73  | 6 | 6.505493   | 5.835556   | 0.000000 |
| 74  | 8 | 7.193655   | 3.444995   | 0.000000 |
| 75  | 8 | 12.392760  | 1.617039   | 0.000000 |
| 76  | 6 | 14.874130  | 4.404402   | 0.000000 |
| 77  | 8 | 14.213080  | 6.806553   | 0.000000 |
| 78  | 6 | 12.755952  | 8.827468   | 0.000000 |
| 79  | 6 | 11.434232  | 9.297127   | 0.000000 |
| 80  | 8 | 9.028750   | 8.641585   | 0.000000 |
| 81  | 6 | 4.798879   | -7.473241  | 0.000000 |
| 82  | 6 | 5.835556   | -6.505493  | 0.000000 |
| 83  | 6 | -0.095447  | 1.855655   | 0.000000 |
| 84  | 6 | 1.237656   | 1.385920   | 0.000000 |
| 85  | 6 | 1.855655   | 0.095447   | 0.000000 |
| 86  | 6 | 1.385920   | -1.237656  | 0.000000 |
| 87  | 6 | 0.095447   | -1.855655  | 0.000000 |
| 88  | 6 | -1.237656  | -1.385920  | 0.000000 |
| 89  | 6 | -1.855655  | -0.095447  | 0.000000 |
| 90  | 6 | -1.385920  | 1.237656   | 0.000000 |
| 91  | 6 | -3.231811  | -0.327721  | 0.000000 |
| 92  | 6 | -2.281321  | -2.312483  | 0.000000 |
| 93  | 6 | 0.327721   | -3.231811  | 0.000000 |
| 94  | 6 | 2.312483   | -2.281321  | 0.000000 |
| 95  | 6 | 3.231811   | 0.327721   | 0.000000 |
| 96  | 6 | 2.281321   | 2.312483   | 0.000000 |
| 97  | 6 | -0.327721  | 3.231811   | 0.000000 |
| 98  | 6 | -2.312483  | 2.281321   | 0.000000 |
| 99  | 8 | -3.510433  | -1.681124  | 0.000000 |
| 100 | 8 | 1.681124   | -3.510433  | 0.000000 |
| 101 | 8 | 3.510433   | 1.681124   | 0.000000 |
| 102 | 8 | -1.681124  | 3.510433   | 0.000000 |
| 103 | 6 | -2.885277  | -6.061720  | 0.000000 |
| 104 | 6 | -1.552094  | -6.531483  | 0.000000 |
| 105 | 6 | -0.933115  | -7.822022  | 0.000000 |
| 106 | 6 | -1.402683  | -9.153432  | 0.000000 |
| 107 | 6 | -2.697780  | -9.763634  | 0.000000 |
| 108 | 6 | -4.018868  | -9.298132  | 0.000000 |
| 109 | 6 | -4.645358  | -8.010836  | 0.000000 |
| 110 | 6 | -4.176554  | -6.679156  | 0.000000 |
| 111 | 6 | -6.019677  | -8.249724  | 0.000000 |
| 112 | 6 | -5.062191  | -10.240284 | 0.000000 |
| 113 | 6 | -2.475545  | -11.151720 | 0.000000 |
| 114 | 6 | -0.481697  | -10.201099 | 0.000000 |
| 115 | 6 | 0.442264   | -7.589605  | 0.000000 |
| 116 | 6 | -0.508518  | -5.605298  | 0.000000 |
| 117 | 6 | -3.117717  | -4.685914  | 0.000000 |
| 118 | 6 | -5.102422  | -5.635866  | 0.000000 |
| 119 | 6 | -6.990775  | -7.214112  | 0.000000 |
| 120 | 8 | -6.297215  | -9.603804  | 0.000000 |
| 121 | 6 | -4.838943  | -11.623120 | 0.000000 |
| 122 | 6 | -3.516366  | -12.089146 | 0.000000 |
| 123 | 8 | -1.114326  | -11.430059 | 0.000000 |
| 124 | 8 | 0.720930   | -6.235670  | 0.000000 |
| 125 | 6 | -0.706399  | -4.201355  | 0.000000 |
| 126 | 6 | -2.083428  | -3.716142  | 0.000000 |
| 127 | 8 | -4.470763  | -4.406313  | 0.000000 |
| 128 | 1 | -5.672531  | -12.318998 | 0.000000 |
| 129 | 1 | -3.303151  | -13.153879 | 0.000000 |
| 130 | 6 | -8.010836  | 4.645358   | 0.000000 |
| 131 | 6 | -6.679156  | 4.176554   | 0.000000 |
| 132 | 6 | -6.061720  | 2.885277   | 0.000000 |
| 133 | 6 | -6.531483  | 1.552094   | 0.000000 |
| 134 | 6 | -7.822022  | 0.933115   | 0.000000 |
| 135 | 6 | -9.153432  | 1.402683   | 0.000000 |
| 136 | 6 | -9.763634  | 2.697780   | 0.000000 |
| 137 | 6 | -9.298132  | 4.018868   | 0.000000 |
| 138 | 6 | -11.151720 | 2.475545   | 0.000000 |
| 139 | 6 | -10.201099 | 0.481697   | 0.000000 |
| 140 | 6 | -7.589605  | -0.442264  | 0.000000 |
| 141 | 6 | -5.605298  | 0.508518   | 0.000000 |
| 142 | 6 | -4.685914  | 3.117717   | 0.000000 |
| 143 | 6 | -5.635866  | 5.102422   | 0.000000 |
| 144 | 6 | -8.249724  | 6.019677   | 0.000000 |
| 145 | 6 | -10.240284 | 5.062191   | 0.000000 |
| 146 | 6 | -11.623120 | 4.838943   | 0.000000 |
| 147 | 6 | -12.089146 | 3.516366   | 0.000000 |
| 148 | 8 | -11.430059 | 1.114326   | 0.000000 |
| 149 | 8 | -6.235670  | -0.720930  | 0.000000 |

|     |   |            |            |          |
|-----|---|------------|------------|----------|
| 150 | 6 | -4.201355  | 0.706399   | 0.000000 |
| 151 | 6 | -3.716142  | 2.083428   | 0.000000 |
| 152 | 8 | -4.406313  | 4.470763   | 0.000000 |
| 153 | 6 | -5.835556  | 6.505493   | 0.000000 |
| 154 | 6 | -7.214112  | 6.990775   | 0.000000 |
| 155 | 8 | -9.603804  | 6.297215   | 0.000000 |
| 156 | 1 | -12.318998 | 5.672531   | 0.000000 |
| 157 | 1 | -13.153879 | 3.303151   | 0.000000 |
| 158 | 6 | -10.799079 | -3.269310  | 0.000000 |
| 159 | 6 | -9.467073  | -3.739486  | 0.000000 |
| 160 | 6 | -8.848279  | -5.031619  | 0.000000 |
| 161 | 6 | -9.316983  | -6.364144  | 0.000000 |
| 162 | 6 | -10.612120 | -6.975307  | 0.000000 |
| 163 | 6 | -11.930832 | -6.507781  | 0.000000 |
| 164 | 6 | -12.549585 | -5.215734  | 0.000000 |
| 165 | 6 | -12.087150 | -3.895229  | 0.000000 |
| 166 | 6 | -13.935650 | -5.445732  | 0.000000 |
| 167 | 6 | -12.978936 | -7.443491  | 0.000000 |
| 168 | 6 | -10.390546 | -8.363157  | 0.000000 |
| 169 | 6 | -8.396943  | -7.412312  | 0.000000 |
| 170 | 6 | -7.473241  | -4.798879  | 0.000000 |
| 171 | 6 | -8.423746  | -2.814086  | 0.000000 |
| 172 | 6 | -13.029531 | -2.852568  | 0.000000 |
| 173 | 6 | -14.411471 | -3.080216  | 0.000000 |
| 174 | 6 | -14.874130 | -4.404402  | 0.000000 |
| 175 | 8 | -14.213080 | -6.806553  | 0.000000 |
| 176 | 6 | -12.755952 | -8.827468  | 0.000000 |
| 177 | 6 | -11.434232 | -9.297127  | 0.000000 |
| 178 | 8 | -9.028750  | -8.641585  | 0.000000 |
| 179 | 6 | -6.505493  | -5.835556  | 0.000000 |
| 180 | 8 | -7.193655  | -3.444995  | 0.000000 |
| 181 | 6 | -8.624757  | -1.410224  | 0.000000 |
| 182 | 8 | -12.392760 | -1.617039  | 0.000000 |
| 183 | 1 | -15.110253 | -2.248976  | 0.000000 |
| 184 | 1 | -15.938770 | -4.618497  | 0.000000 |
| 185 | 1 | -13.590168 | -9.522722  | 0.000000 |
| 186 | 1 | -11.224666 | -10.362649 | 0.000000 |
| 187 | 6 | 2.697780   | 9.763634   | 0.000000 |
| 188 | 6 | 4.018868   | 9.298132   | 0.000000 |
| 189 | 6 | 4.645358   | 8.010836   | 0.000000 |
| 190 | 6 | 4.176554   | 6.679156   | 0.000000 |
| 191 | 6 | 2.885277   | 6.061720   | 0.000000 |
| 192 | 6 | 1.552094   | 6.531483   | 0.000000 |
| 193 | 6 | 0.933115   | 7.822022   | 0.000000 |
| 194 | 6 | 1.402683   | 9.153432   | 0.000000 |
| 195 | 6 | -0.442264  | 7.589605   | 0.000000 |
| 196 | 6 | 0.508518   | 5.605298   | 0.000000 |
| 197 | 6 | 3.117717   | 4.685914   | 0.000000 |
| 198 | 6 | 5.102422   | 5.635866   | 0.000000 |
| 199 | 6 | 6.019677   | 8.249724   | 0.000000 |
| 200 | 6 | 5.062191   | 10.240284  | 0.000000 |
| 201 | 6 | 2.475545   | 11.151720  | 0.000000 |
| 202 | 6 | 0.481697   | 10.201099  | 0.000000 |
| 203 | 6 | -1.410224  | 8.624757   | 0.000000 |
| 204 | 8 | -0.720930  | 6.235670   | 0.000000 |
| 205 | 6 | 0.706399   | 4.201355   | 0.000000 |
| 206 | 6 | 2.083428   | 3.716142   | 0.000000 |
| 207 | 8 | 4.470763   | 4.406313   | 0.000000 |
| 208 | 8 | 6.297215   | 9.603804   | 0.000000 |
| 209 | 6 | 4.838943   | 11.623120  | 0.000000 |
| 210 | 6 | 3.516366   | 12.089146  | 0.000000 |
| 211 | 8 | 1.114326   | 11.430059  | 0.000000 |
| 212 | 6 | -5.215734  | 12.549585  | 0.000000 |
| 213 | 6 | -3.895229  | 12.087150  | 0.000000 |
| 214 | 6 | -3.269310  | 10.799079  | 0.000000 |
| 215 | 6 | -3.739486  | 9.467073   | 0.000000 |
| 216 | 6 | -5.031619  | 8.848279   | 0.000000 |
| 217 | 6 | -6.364144  | 9.316983   | 0.000000 |
| 218 | 6 | -6.975307  | 10.612120  | 0.000000 |
| 219 | 6 | -6.507781  | 11.930832  | 0.000000 |
| 220 | 6 | -8.363157  | 10.390546  | 0.000000 |
| 221 | 6 | -7.412312  | 8.396943   | 0.000000 |
| 222 | 6 | -4.798879  | 7.473241   | 0.000000 |
| 223 | 6 | -2.814086  | 8.423746   | 0.000000 |
| 224 | 6 | -1.895413  | 11.038951  | 0.000000 |
| 225 | 6 | -2.852568  | 13.029531  | 0.000000 |
| 226 | 6 | -5.445732  | 13.935650  | 0.000000 |
| 227 | 6 | -7.443491  | 12.978936  | 0.000000 |
| 228 | 6 | -8.827468  | 12.755952  | 0.000000 |

|     |   |            |            |          |
|-----|---|------------|------------|----------|
| 229 | 6 | -9.297127  | 11.434232  | 0.000000 |
| 230 | 8 | -8.641585  | 9.028750   | 0.000000 |
| 231 | 8 | -3.444995  | 7.193655   | 0.000000 |
| 232 | 6 | -0.924107  | 10.003018  | 0.000000 |
| 233 | 8 | -1.617039  | 12.392760  | 0.000000 |
| 234 | 6 | -3.080216  | 14.411471  | 0.000000 |
| 235 | 6 | -4.404402  | 14.874130  | 0.000000 |
| 236 | 8 | -6.806553  | 14.213080  | 0.000000 |
| 237 | 1 | -9.522722  | 13.590168  | 0.000000 |
| 238 | 1 | -10.362649 | 11.224666  | 0.000000 |
| 239 | 6 | -11.038951 | -1.895413  | 0.000000 |
| 240 | 6 | -10.003018 | -0.924107  | 0.000000 |
| 241 | 1 | 9.522722   | -13.590168 | 0.000000 |
| 242 | 1 | 12.318998  | -5.672531  | 0.000000 |
| 243 | 1 | 13.153879  | -3.303151  | 0.000000 |
| 244 | 1 | 10.362649  | -11.224666 | 0.000000 |
| 245 | 1 | 15.110253  | 2.248976   | 0.000000 |
| 246 | 1 | 15.938770  | 4.618497   | 0.000000 |
| 247 | 1 | 13.590168  | 9.522722   | 0.000000 |
| 248 | 1 | 11.224666  | 10.362649  | 0.000000 |
| 249 | 1 | 5.672531   | 12.318998  | 0.000000 |
| 250 | 1 | 3.303151   | 13.153879  | 0.000000 |
| 251 | 1 | -2.248976  | 15.110253  | 0.000000 |
| 252 | 1 | -4.618497  | 15.938770  | 0.000000 |

---

**Table S6.** The optimized Cartesian coordinates of the compound **3** calculated at the B3LYP/6–21G(d) level of theory

| Center<br>Number | Atomic<br>Number | Coordinates (Angstroms) |           |          |
|------------------|------------------|-------------------------|-----------|----------|
|                  |                  | X                       | Y         | Z        |
| 1                | 6                | 11.604488               | 6.550636  | 0.000000 |
| 2                | 6                | 10.331516               | 5.832054  | 0.000000 |
| 3                | 6                | -3.685459               | 11.567329 | 0.000000 |
| 4                | 6                | -4.379333               | 12.797086 | 0.000000 |
| 5                | 6                | -3.986314               | 14.173761 | 0.000000 |
| 6                | 6                | -2.766135               | 14.862077 | 0.000000 |
| 7                | 6                | -1.384554               | 14.486675 | 0.000000 |
| 8                | 6                | -0.690222               | 13.257433 | 0.000000 |
| 9                | 6                | -1.075064               | 11.878820 | 0.000000 |
| 10               | 6                | -2.306218               | 11.184148 | 0.000000 |
| 11               | 6                | 0.114055                | 11.148483 | 0.000000 |
| 12               | 6                | 0.704715                | 13.268120 | 0.000000 |
| 13               | 6                | -0.660025               | 15.678895 | 0.000000 |
| 14               | 6                | -2.788901               | 16.267694 | 0.000000 |
| 15               | 6                | -5.177615               | 14.920107 | 0.000000 |
| 16               | 6                | -5.774460               | 12.793386 | 0.000000 |
| 17               | 6                | -4.415448               | 10.378737 | 0.000000 |
| 18               | 6                | -2.295563               | 9.788670  | 0.000000 |
| 19               | 8                | 1.214702                | 11.983305 | 0.000000 |
| 20               | 8                | -1.496885               | 16.778607 | 0.000000 |
| 21               | 6                | -3.977037               | 17.009614 | 0.000000 |
| 22               | 6                | -5.198282               | 16.320706 | 0.000000 |
| 23               | 8                | -6.283100               | 14.078276 | 0.000000 |
| 24               | 8                | -3.579296               | 9.278024  | 0.000000 |
| 25               | 1                | -3.952274               | 18.095221 | 0.000000 |
| 26               | 1                | -6.140263               | 16.860944 | 0.000000 |
| 27               | 6                | 3.624405                | 15.691150 | 0.000000 |
| 28               | 6                | 2.929483                | 16.920722 | 0.000000 |
| 29               | 6                | 3.321346                | 18.298135 | 0.000000 |
| 30               | 6                | 4.541022                | 18.983641 | 0.000000 |
| 31               | 6                | 5.921015                | 18.599492 | 0.000000 |
| 32               | 6                | 6.611058                | 17.382376 | 0.000000 |
| 33               | 6                | 6.234845                | 16.000607 | 0.000000 |
| 34               | 6                | 5.004555                | 15.306957 | 0.000000 |
| 35               | 6                | 7.427451                | 15.277301 | 0.000000 |
| 36               | 6                | 8.016195                | 17.406085 | 0.000000 |
| 37               | 6                | 6.659776                | 19.794625 | 0.000000 |
| 38               | 6                | 4.526048                | 20.388592 | 0.000000 |
| 39               | 6                | 2.130566                | 19.044471 | 0.000000 |
| 40               | 6                | 1.534682                | 16.917675 | 0.000000 |
| 41               | 6                | 2.894850                | 14.502589 | 0.000000 |
| 42               | 6                | 5.015043                | 13.912390 | 0.000000 |
| 43               | 6                | 7.477263                | 13.858213 | 0.000000 |
| 44               | 8                | 8.527556                | 16.113420 | 0.000000 |
| 45               | 6                | 8.754109                | 18.596492 | 0.000000 |
| 46               | 6                | 8.061477                | 19.816072 | 0.000000 |
| 47               | 8                | 5.817592                | 20.898735 | 0.000000 |
| 48               | 6                | 3.337042                | 21.131216 | 0.000000 |
| 49               | 6                | 2.113875                | 20.444938 | 0.000000 |
| 50               | 8                | 1.024834                | 18.201957 | 0.000000 |
| 51               | 6                | 0.758789                | 15.728438 | 0.000000 |
| 52               | 6                | 1.477596                | 14.455907 | 0.000000 |
| 53               | 8                | 3.730522                | 13.401281 | 0.000000 |
| 54               | 1                | 9.839876                | 18.575709 | 0.000000 |
| 55               | 1                | 8.600809                | 20.758662 | 0.000000 |
| 56               | 1                | 3.362322                | 22.216903 | 0.000000 |
| 57               | 1                | 1.173540                | 20.988162 | 0.000000 |
| 58               | 6                | 0.442805                | 4.258123  | 0.000000 |
| 59               | 6                | -0.251937               | 5.488822  | 0.000000 |
| 60               | 6                | 0.131645                | 6.867022  | 0.000000 |
| 61               | 6                | 1.362370                | 7.561549  | 0.000000 |
| 62               | 6                | 2.740651                | 7.177876  | 0.000000 |
| 63               | 6                | 3.435492                | 5.947328  | 0.000000 |
| 64               | 6                | 3.051783                | 4.569163  | 0.000000 |
| 65               | 6                | 1.821065                | 3.874456  | 0.000000 |
| 66               | 6                | 4.240871                | 3.838613  | 0.000000 |
| 67               | 6                | 4.831147                | 5.958276  | 0.000000 |
| 68               | 6                | 3.471382                | 8.366865  | 0.000000 |
| 69               | 6                | 1.351097                | 8.957090  | 0.000000 |
| 70               | 6                | -1.057609               | 7.597532  | 0.000000 |

|     |   |            |           |          |
|-----|---|------------|-----------|----------|
| 71  | 6 | -1.647469  | 5.477754  | 0.000000 |
| 72  | 6 | -0.287747  | 3.069107  | 0.000000 |
| 73  | 6 | 1.832172   | 2.478984  | 0.000000 |
| 74  | 6 | 3.019132   | 1.704275  | 0.000000 |
| 75  | 6 | 4.290651   | 2.422037  | 0.000000 |
| 76  | 8 | 5.340871   | 4.674159  | 0.000000 |
| 77  | 8 | 2.635323   | 9.466960  | 0.000000 |
| 78  | 6 | 0.163810   | 9.731646  | 0.000000 |
| 79  | 6 | -1.107827  | 9.014074  | 0.000000 |
| 80  | 8 | -2.157523  | 6.761491  | 0.000000 |
| 81  | 6 | -2.422037  | 4.290651  | 0.000000 |
| 82  | 6 | -1.704275  | 3.019132  | 0.000000 |
| 83  | 8 | 0.548102   | 1.968964  | 0.000000 |
| 84  | 6 | 7.753373   | 8.383854  | 0.000000 |
| 85  | 6 | 7.058240   | 9.614748  | 0.000000 |
| 86  | 6 | 7.441084   | 10.993917 | 0.000000 |
| 87  | 6 | 8.670698   | 11.687589 | 0.000000 |
| 88  | 6 | 10.047530  | 11.295130 | 0.000000 |
| 89  | 6 | 10.736552  | 10.075349 | 0.000000 |
| 90  | 6 | 10.361710  | 8.693614  | 0.000000 |
| 91  | 6 | 9.132222   | 7.999264  | 0.000000 |
| 92  | 6 | 11.554259  | 7.969581  | 0.000000 |
| 93  | 6 | 12.142141  | 10.098797 | 0.000000 |
| 94  | 6 | 10.793307  | 12.486807 | 0.000000 |
| 95  | 6 | 8.666403   | 13.082692 | 0.000000 |
| 96  | 6 | 6.252308   | 11.723833 | 0.000000 |
| 97  | 6 | 5.662791   | 9.603878  | 0.000000 |
| 98  | 6 | 9.143066   | 6.604446  | 0.000000 |
| 99  | 8 | 12.653644  | 8.806844  | 0.000000 |
| 100 | 6 | 12.883527  | 11.287263 | 0.000000 |
| 101 | 6 | 12.193900  | 12.508101 | 0.000000 |
| 102 | 8 | 9.951117   | 13.591821 | 0.000000 |
| 103 | 6 | 6.204326   | 13.140125 | 0.000000 |
| 104 | 8 | 5.151810   | 10.887331 | 0.000000 |
| 105 | 6 | 4.888110   | 8.416540  | 0.000000 |
| 106 | 8 | 7.858441   | 6.094095  | 0.000000 |
| 107 | 1 | 13.969160  | 11.263073 | 0.000000 |
| 108 | 1 | 12.733634  | 13.450356 | 0.000000 |
| 109 | 6 | -18.298135 | 3.321346  | 0.000000 |
| 110 | 6 | -18.983641 | 4.541022  | 0.000000 |
| 111 | 6 | -18.599492 | 5.921015  | 0.000000 |
| 112 | 6 | -17.382376 | 6.611058  | 0.000000 |
| 113 | 6 | -16.000607 | 6.234845  | 0.000000 |
| 114 | 6 | -15.306957 | 5.004555  | 0.000000 |
| 115 | 6 | -15.691150 | 3.624405  | 0.000000 |
| 116 | 6 | -16.920722 | 2.929483  | 0.000000 |
| 117 | 6 | -14.502589 | 2.894850  | 0.000000 |
| 118 | 6 | -13.912390 | 5.015043  | 0.000000 |
| 119 | 6 | -15.277301 | 7.427451  | 0.000000 |
| 120 | 6 | -17.406085 | 8.016195  | 0.000000 |
| 121 | 6 | -19.794625 | 6.659776  | 0.000000 |
| 122 | 6 | -20.388592 | 4.526048  | 0.000000 |
| 123 | 6 | -19.044471 | 2.130566  | 0.000000 |
| 124 | 6 | -16.917675 | 1.534682  | 0.000000 |
| 125 | 8 | -13.401281 | 3.730522  | 0.000000 |
| 126 | 8 | -16.113420 | 8.527556  | 0.000000 |
| 127 | 6 | -18.596492 | 8.754109  | 0.000000 |
| 128 | 6 | -19.816072 | 8.061477  | 0.000000 |
| 129 | 8 | -20.898735 | 5.817592  | 0.000000 |
| 130 | 6 | -21.131216 | 3.337042  | 0.000000 |
| 131 | 6 | -20.444938 | 2.113875  | 0.000000 |
| 132 | 8 | -18.201957 | 1.024834  | 0.000000 |
| 133 | 1 | -18.575709 | 9.839876  | 0.000000 |
| 134 | 1 | -20.758662 | 8.600809  | 0.000000 |
| 135 | 1 | -22.216903 | 3.362322  | 0.000000 |
| 136 | 1 | -20.988162 | 1.173540  | 0.000000 |
| 137 | 6 | -10.993917 | 7.441084  | 0.000000 |
| 138 | 6 | -11.687589 | 8.670698  | 0.000000 |
| 139 | 6 | -11.295130 | 10.047530 | 0.000000 |
| 140 | 6 | -10.075349 | 10.736552 | 0.000000 |
| 141 | 6 | -8.693614  | 10.361710 | 0.000000 |
| 142 | 6 | -7.999264  | 9.132222  | 0.000000 |
| 143 | 6 | -8.383854  | 7.753373  | 0.000000 |
| 144 | 6 | -9.614748  | 7.058240  | 0.000000 |
| 145 | 6 | -7.194600  | 7.023205  | 0.000000 |
| 146 | 6 | -6.604446  | 9.143066  | 0.000000 |
| 147 | 6 | -7.969581  | 11.554259 | 0.000000 |
| 148 | 6 | -10.098797 | 12.142141 | 0.000000 |
| 149 | 6 | -12.486807 | 10.793307 | 0.000000 |

|     |   |            |           |          |
|-----|---|------------|-----------|----------|
| 150 | 6 | -13.082692 | 8.666403  | 0.000000 |
| 151 | 6 | -11.723833 | 6.252308  | 0.000000 |
| 152 | 6 | -9.603878  | 5.662791  | 0.000000 |
| 153 | 6 | -7.145122  | 5.606071  | 0.000000 |
| 154 | 8 | -6.094095  | 7.858441  | 0.000000 |
| 155 | 6 | -5.832054  | 10.331516 | 0.000000 |
| 156 | 6 | -6.550636  | 11.604488 | 0.000000 |
| 157 | 8 | -8.806844  | 12.653644 | 0.000000 |
| 158 | 6 | -11.287263 | 12.883527 | 0.000000 |
| 159 | 6 | -12.508101 | 12.193900 | 0.000000 |
| 160 | 8 | -13.591821 | 9.951117  | 0.000000 |
| 161 | 6 | -13.858213 | 7.477263  | 0.000000 |
| 162 | 6 | -13.140125 | 6.204326  | 0.000000 |
| 163 | 8 | -10.887331 | 5.151810  | 0.000000 |
| 164 | 1 | -11.263073 | 13.969160 | 0.000000 |
| 165 | 1 | -13.450356 | 12.733634 | 0.000000 |
| 166 | 6 | -14.173761 | -3.986314 | 0.000000 |
| 167 | 6 | -14.862077 | -2.766135 | 0.000000 |
| 168 | 6 | -14.486675 | -1.384554 | 0.000000 |
| 169 | 6 | -13.257433 | -0.690222 | 0.000000 |
| 170 | 6 | -11.878820 | -1.075064 | 0.000000 |
| 171 | 6 | -11.184148 | -2.306218 | 0.000000 |
| 172 | 6 | -11.567329 | -3.685459 | 0.000000 |
| 173 | 6 | -12.797086 | -4.379333 | 0.000000 |
| 174 | 6 | -10.378737 | -4.415448 | 0.000000 |
| 175 | 6 | -9.788670  | -2.295563 | 0.000000 |
| 176 | 6 | -11.148483 | 0.114055  | 0.000000 |
| 177 | 6 | -13.268120 | 0.704715  | 0.000000 |
| 178 | 6 | -15.678895 | -0.660025 | 0.000000 |
| 179 | 6 | -16.267694 | -2.788901 | 0.000000 |
| 180 | 6 | -14.920107 | -5.177615 | 0.000000 |
| 181 | 6 | -12.793386 | -5.774460 | 0.000000 |
| 182 | 8 | -9.278024  | -3.579296 | 0.000000 |
| 183 | 8 | -11.983305 | 1.214702  | 0.000000 |
| 184 | 6 | -14.455907 | 1.477596  | 0.000000 |
| 185 | 6 | -15.728438 | 0.758789  | 0.000000 |
| 186 | 8 | -16.778607 | -1.496885 | 0.000000 |
| 187 | 6 | -17.009614 | -3.977037 | 0.000000 |
| 188 | 6 | -16.320706 | -5.198282 | 0.000000 |
| 189 | 8 | -14.078276 | -6.283100 | 0.000000 |
| 190 | 1 | -18.095221 | -3.952274 | 0.000000 |
| 191 | 1 | -16.860944 | -6.140263 | 0.000000 |
| 192 | 6 | -6.867022  | 0.131645  | 0.000000 |
| 193 | 6 | -7.561549  | 1.362370  | 0.000000 |
| 194 | 6 | -7.177876  | 2.740651  | 0.000000 |
| 195 | 6 | -5.947328  | 3.435492  | 0.000000 |
| 196 | 6 | -4.569163  | 3.051783  | 0.000000 |
| 197 | 6 | -3.874456  | 1.821065  | 0.000000 |
| 198 | 6 | -4.258123  | 0.442805  | 0.000000 |
| 199 | 6 | -5.488822  | -0.251937 | 0.000000 |
| 200 | 6 | -3.069107  | -0.287747 | 0.000000 |
| 201 | 6 | -2.478984  | 1.832172  | 0.000000 |
| 202 | 6 | -3.838613  | 4.240871  | 0.000000 |
| 203 | 6 | -5.958276  | 4.831147  | 0.000000 |
| 204 | 6 | -8.366865  | 3.471382  | 0.000000 |
| 205 | 6 | -8.957090  | 1.351097  | 0.000000 |
| 206 | 6 | -7.597532  | -1.057609 | 0.000000 |
| 207 | 6 | -5.477754  | -1.647469 | 0.000000 |
| 208 | 6 | -4.290651  | -2.422037 | 0.000000 |
| 209 | 6 | -3.019132  | -1.704275 | 0.000000 |
| 210 | 8 | -1.968964  | 0.548102  | 0.000000 |
| 211 | 8 | -4.674159  | 5.340871  | 0.000000 |
| 212 | 6 | -8.416540  | 4.888110  | 0.000000 |
| 213 | 8 | -9.466960  | 2.635323  | 0.000000 |
| 214 | 6 | -9.731646  | 0.163810  | 0.000000 |
| 215 | 6 | -9.014074  | -1.107827 | 0.000000 |
| 216 | 8 | -6.761491  | -2.157523 | 0.000000 |
| 217 | 6 | 7.023205   | 7.194600  | 0.000000 |
| 218 | 6 | 5.606071   | 7.145122  | 0.000000 |
| 219 | 6 | 4.569163   | -3.051783 | 0.000000 |
| 220 | 6 | 3.874456   | -1.821065 | 0.000000 |
| 221 | 6 | 4.258123   | -0.442805 | 0.000000 |
| 222 | 6 | 5.488822   | 0.251937  | 0.000000 |
| 223 | 6 | 6.867022   | -0.131645 | 0.000000 |
| 224 | 6 | 7.561549   | -1.362370 | 0.000000 |
| 225 | 6 | 7.177876   | -2.740651 | 0.000000 |
| 226 | 6 | 5.947328   | -3.435492 | 0.000000 |
| 227 | 6 | 8.366865   | -3.471382 | 0.000000 |
| 228 | 6 | 8.957090   | -1.351097 | 0.000000 |



|     |   |           |            |          |
|-----|---|-----------|------------|----------|
| 229 | 6 | 7.597532  | 1.057609   | 0.000000 |
| 230 | 6 | 5.477754  | 1.647469   | 0.000000 |
| 231 | 6 | 3.069107  | 0.287747   | 0.000000 |
| 232 | 6 | 2.478984  | -1.832172  | 0.000000 |
| 233 | 6 | 3.838613  | -4.240871  | 0.000000 |
| 234 | 6 | 5.958276  | -4.831147  | 0.000000 |
| 235 | 8 | 9.466960  | -2.635323  | 0.000000 |
| 236 | 8 | 6.761491  | 2.157523   | 0.000000 |
| 237 | 8 | 1.968964  | -0.548102  | 0.000000 |
| 238 | 8 | 4.674159  | -5.340871  | 0.000000 |
| 239 | 6 | 11.878820 | 1.075064   | 0.000000 |
| 240 | 6 | 11.184148 | 2.306218   | 0.000000 |
| 241 | 6 | 11.567329 | 3.685459   | 0.000000 |
| 242 | 6 | 12.797086 | 4.379333   | 0.000000 |
| 243 | 6 | 14.173761 | 3.986314   | 0.000000 |
| 244 | 6 | 14.862077 | 2.766135   | 0.000000 |
| 245 | 6 | 14.486675 | 1.384554   | 0.000000 |
| 246 | 6 | 13.257433 | 0.690222   | 0.000000 |
| 247 | 6 | 15.678895 | 0.660025   | 0.000000 |
| 248 | 6 | 16.267694 | 2.788901   | 0.000000 |
| 249 | 6 | 14.920107 | 5.177615   | 0.000000 |
| 250 | 6 | 12.793386 | 5.774460   | 0.000000 |
| 251 | 6 | 10.378737 | 4.415448   | 0.000000 |
| 252 | 6 | 9.788670  | 2.295563   | 0.000000 |
| 253 | 6 | 11.148483 | -0.114055  | 0.000000 |
| 254 | 6 | 13.268120 | -0.704715  | 0.000000 |
| 255 | 6 | 15.728438 | -0.758789  | 0.000000 |
| 256 | 8 | 16.778607 | 1.496885   | 0.000000 |
| 257 | 6 | 17.009614 | 3.977037   | 0.000000 |
| 258 | 6 | 16.320706 | 5.198282   | 0.000000 |
| 259 | 8 | 14.078276 | 6.283100   | 0.000000 |
| 260 | 8 | 9.278024  | 3.579296   | 0.000000 |
| 261 | 6 | 9.014074  | 1.107827   | 0.000000 |
| 262 | 6 | 9.731646  | -0.163810  | 0.000000 |
| 263 | 8 | 11.983305 | -1.214702  | 0.000000 |
| 264 | 1 | 18.095221 | 3.952274   | 0.000000 |
| 265 | 1 | 16.860944 | 6.140263   | 0.000000 |
| 266 | 6 | 8.693614  | -10.361710 | 0.000000 |
| 267 | 6 | 7.999264  | -9.132222  | 0.000000 |
| 268 | 6 | 8.383854  | -7.753373  | 0.000000 |
| 269 | 6 | 9.614748  | -7.058240  | 0.000000 |
| 270 | 6 | 10.993917 | -7.441084  | 0.000000 |
| 271 | 6 | 11.687589 | -8.670698  | 0.000000 |
| 272 | 6 | 11.295130 | -10.047530 | 0.000000 |
| 273 | 6 | 10.075349 | -10.736552 | 0.000000 |
| 274 | 6 | 12.486807 | -10.793307 | 0.000000 |
| 275 | 6 | 13.082692 | -8.666403  | 0.000000 |
| 276 | 6 | 11.723833 | -6.252308  | 0.000000 |
| 277 | 6 | 9.603878  | -5.662791  | 0.000000 |
| 278 | 6 | 7.194600  | -7.023205  | 0.000000 |
| 279 | 6 | 6.604446  | -9.143066  | 0.000000 |
| 280 | 6 | 7.969581  | -11.554259 | 0.000000 |
| 281 | 6 | 10.098797 | -12.142141 | 0.000000 |
| 282 | 6 | 11.287263 | -12.883527 | 0.000000 |
| 283 | 6 | 12.508101 | -12.193900 | 0.000000 |
| 284 | 8 | 13.591821 | -9.951117  | 0.000000 |
| 285 | 8 | 10.887331 | -5.151810  | 0.000000 |
| 286 | 6 | 8.416540  | -4.888110  | 0.000000 |
| 287 | 6 | 7.145122  | -5.606071  | 0.000000 |
| 288 | 8 | 6.094095  | -7.858441  | 0.000000 |
| 289 | 6 | 5.832054  | -10.331516 | 0.000000 |
| 290 | 6 | 6.550636  | -11.604488 | 0.000000 |
| 291 | 8 | 8.806844  | -12.653644 | 0.000000 |
| 292 | 1 | 11.263073 | -13.969160 | 0.000000 |
| 293 | 1 | 13.450356 | -12.733634 | 0.000000 |
| 294 | 6 | 16.000607 | -6.234845  | 0.000000 |
| 295 | 6 | 15.306957 | -5.004555  | 0.000000 |
| 296 | 6 | 15.691150 | -3.624405  | 0.000000 |
| 297 | 6 | 16.920722 | -2.929483  | 0.000000 |
| 298 | 6 | 18.298135 | -3.321346  | 0.000000 |
| 299 | 6 | 18.983641 | -4.541022  | 0.000000 |
| 300 | 6 | 18.599492 | -5.921015  | 0.000000 |
| 301 | 6 | 17.382376 | -6.611058  | 0.000000 |
| 302 | 6 | 19.794625 | -6.659776  | 0.000000 |
| 303 | 6 | 20.388592 | -4.526048  | 0.000000 |
| 304 | 6 | 19.044471 | -2.130566  | 0.000000 |
| 305 | 6 | 16.917675 | -1.534682  | 0.000000 |
| 306 | 6 | 14.502589 | -2.894850  | 0.000000 |
| 307 | 6 | 13.912390 | -5.015043  | 0.000000 |

|     |   |            |            |          |
|-----|---|------------|------------|----------|
| 308 | 6 | 17.406085  | -8.016195  | 0.000000 |
| 309 | 6 | 18.596492  | -8.754109  | 0.000000 |
| 310 | 6 | 19.816072  | -8.061477  | 0.000000 |
| 311 | 8 | 20.898735  | -5.817592  | 0.000000 |
| 312 | 6 | 21.131216  | -3.337042  | 0.000000 |
| 313 | 6 | 20.444938  | -2.113875  | 0.000000 |
| 314 | 8 | 18.201957  | -1.024834  | 0.000000 |
| 315 | 6 | 14.455907  | -1.477596  | 0.000000 |
| 316 | 8 | 13.401281  | -3.730522  | 0.000000 |
| 317 | 6 | 13.140125  | -6.204326  | 0.000000 |
| 318 | 8 | 16.113420  | -8.527556  | 0.000000 |
| 319 | 1 | 18.575709  | -9.839876  | 0.000000 |
| 320 | 1 | 20.758662  | -8.600809  | 0.000000 |
| 321 | 1 | 22.216903  | -3.362322  | 0.000000 |
| 322 | 1 | 20.988162  | -1.173540  | 0.000000 |
| 323 | 6 | -10.047530 | -11.295130 | 0.000000 |
| 324 | 6 | -10.736552 | -10.075349 | 0.000000 |
| 325 | 6 | -10.361710 | -8.693614  | 0.000000 |
| 326 | 6 | -9.132222  | -7.999264  | 0.000000 |
| 327 | 6 | -7.753373  | -8.383854  | 0.000000 |
| 328 | 6 | -7.058240  | -9.614748  | 0.000000 |
| 329 | 6 | -7.441084  | -10.993917 | 0.000000 |
| 330 | 6 | -8.670698  | -11.687589 | 0.000000 |
| 331 | 6 | -6.252308  | -11.723833 | 0.000000 |
| 332 | 6 | -5.662791  | -9.603878  | 0.000000 |
| 333 | 6 | -7.023205  | -7.194600  | 0.000000 |
| 334 | 6 | -9.143066  | -6.604446  | 0.000000 |
| 335 | 6 | -11.554259 | -7.969581  | 0.000000 |
| 336 | 6 | -12.142141 | -10.098797 | 0.000000 |
| 337 | 6 | -10.793307 | -12.486807 | 0.000000 |
| 338 | 6 | -8.666403  | -13.082692 | 0.000000 |
| 339 | 8 | -5.151810  | -10.887331 | 0.000000 |
| 340 | 8 | -7.858441  | -6.094095  | 0.000000 |
| 341 | 6 | -10.331516 | -5.832054  | 0.000000 |
| 342 | 6 | -11.604488 | -6.550636  | 0.000000 |
| 343 | 8 | -12.653644 | -8.806844  | 0.000000 |
| 344 | 6 | -12.883527 | -11.287263 | 0.000000 |
| 345 | 6 | -12.193900 | -12.508101 | 0.000000 |
| 346 | 8 | -9.951117  | -13.591821 | 0.000000 |
| 347 | 1 | -13.969160 | -11.263073 | 0.000000 |
| 348 | 1 | -12.733634 | -13.450356 | 0.000000 |
| 349 | 6 | -2.740651  | -7.177876  | 0.000000 |
| 350 | 6 | -3.435492  | -5.947328  | 0.000000 |
| 351 | 6 | -3.051783  | -4.569163  | 0.000000 |
| 352 | 6 | -1.821065  | -3.874456  | 0.000000 |
| 353 | 6 | -0.442805  | -4.258123  | 0.000000 |
| 354 | 6 | 0.251937   | -5.488822  | 0.000000 |
| 355 | 6 | -0.131645  | -6.867022  | 0.000000 |
| 356 | 6 | -1.362370  | -7.561549  | 0.000000 |
| 357 | 6 | 1.057609   | -7.597532  | 0.000000 |
| 358 | 6 | 1.647469   | -5.477754  | 0.000000 |
| 359 | 6 | 0.287747   | -3.069107  | 0.000000 |
| 360 | 6 | -1.832172  | -2.478984  | 0.000000 |
| 361 | 6 | -4.240871  | -3.838613  | 0.000000 |
| 362 | 6 | -4.831147  | -5.958276  | 0.000000 |
| 363 | 6 | -3.471382  | -8.366865  | 0.000000 |
| 364 | 6 | -1.351097  | -8.957090  | 0.000000 |
| 365 | 6 | 1.107827   | -9.014074  | 0.000000 |
| 366 | 8 | 2.157523   | -6.761491  | 0.000000 |
| 367 | 6 | 2.422037   | -4.290651  | 0.000000 |
| 368 | 6 | 1.704275   | -3.019132  | 0.000000 |
| 369 | 8 | -0.548102  | -1.968964  | 0.000000 |
| 370 | 8 | -5.340871  | -4.674159  | 0.000000 |
| 371 | 6 | -5.606071  | -7.145122  | 0.000000 |
| 372 | 6 | -4.888110  | -8.416540  | 0.000000 |
| 373 | 8 | -2.635323  | -9.466960  | 0.000000 |
| 374 | 6 | -5.921015  | -18.599492 | 0.000000 |
| 375 | 6 | -6.611058  | -17.382376 | 0.000000 |
| 376 | 6 | -6.234845  | -16.000607 | 0.000000 |
| 377 | 6 | -5.004555  | -15.306957 | 0.000000 |
| 378 | 6 | -3.624405  | -15.691150 | 0.000000 |
| 379 | 6 | -2.929483  | -16.920722 | 0.000000 |
| 380 | 6 | -3.321346  | -18.298135 | 0.000000 |
| 381 | 6 | -4.541022  | -18.983641 | 0.000000 |
| 382 | 6 | -2.130566  | -19.044471 | 0.000000 |
| 383 | 6 | -1.534682  | -16.917675 | 0.000000 |
| 384 | 6 | -2.894850  | -14.502589 | 0.000000 |
| 385 | 6 | -5.015043  | -13.912390 | 0.000000 |
| 386 | 6 | -7.427451  | -15.277301 | 0.000000 |

|     |   |           |            |          |
|-----|---|-----------|------------|----------|
| 387 | 6 | -8.016195 | -17.406085 | 0.000000 |
| 388 | 6 | -6.659776 | -19.794625 | 0.000000 |
| 389 | 6 | -4.526048 | -20.388592 | 0.000000 |
| 390 | 6 | -3.337042 | -21.131216 | 0.000000 |
| 391 | 6 | -2.113875 | -20.444938 | 0.000000 |
| 392 | 8 | -1.024834 | -18.201957 | 0.000000 |
| 393 | 8 | -3.730522 | -13.401281 | 0.000000 |
| 394 | 6 | -6.204326 | -13.140125 | 0.000000 |
| 395 | 6 | -7.477263 | -13.858213 | 0.000000 |
| 396 | 8 | -8.527556 | -16.113420 | 0.000000 |
| 397 | 6 | -8.754109 | -18.596492 | 0.000000 |
| 398 | 6 | -8.061477 | -19.816072 | 0.000000 |
| 399 | 8 | -5.817592 | -20.898735 | 0.000000 |
| 400 | 1 | -3.362322 | -22.216903 | 0.000000 |
| 401 | 1 | -1.173540 | -20.988162 | 0.000000 |
| 402 | 1 | -9.839876 | -18.575709 | 0.000000 |
| 403 | 1 | -8.600809 | -20.758662 | 0.000000 |
| 404 | 6 | 1.384554  | -14.486675 | 0.000000 |
| 405 | 6 | 0.690222  | -13.257433 | 0.000000 |
| 406 | 6 | 1.075064  | -11.878820 | 0.000000 |
| 407 | 6 | 2.306218  | -11.184148 | 0.000000 |
| 408 | 6 | 3.685459  | -11.567329 | 0.000000 |
| 409 | 6 | 4.379333  | -12.797086 | 0.000000 |
| 410 | 6 | 3.986314  | -14.173761 | 0.000000 |
| 411 | 6 | 2.766135  | -14.862077 | 0.000000 |
| 412 | 6 | 5.177615  | -14.920107 | 0.000000 |
| 413 | 6 | 5.774460  | -12.793386 | 0.000000 |
| 414 | 6 | 4.415448  | -10.378737 | 0.000000 |
| 415 | 6 | 2.295563  | -9.788670  | 0.000000 |
| 416 | 6 | -0.114055 | -11.148483 | 0.000000 |
| 417 | 6 | -0.704715 | -13.268120 | 0.000000 |
| 418 | 6 | 0.660025  | -15.678895 | 0.000000 |
| 419 | 6 | 2.788901  | -16.267694 | 0.000000 |
| 420 | 6 | 3.977037  | -17.009614 | 0.000000 |
| 421 | 6 | 5.198282  | -16.320706 | 0.000000 |
| 422 | 8 | 6.283100  | -14.078276 | 0.000000 |
| 423 | 8 | 3.579296  | -9.278024  | 0.000000 |
| 424 | 6 | -0.163810 | -9.731646  | 0.000000 |
| 425 | 8 | -1.214702 | -11.983305 | 0.000000 |
| 426 | 6 | -1.477596 | -14.455907 | 0.000000 |
| 427 | 6 | -0.758789 | -15.728438 | 0.000000 |
| 428 | 8 | 1.496885  | -16.778607 | 0.000000 |
| 429 | 1 | 3.952274  | -18.095221 | 0.000000 |
| 430 | 1 | 6.140263  | -16.860944 | 0.000000 |
| 431 | 6 | 15.277301 | -7.427451  | 0.000000 |
| 432 | 6 | 13.858213 | -7.477263  | 0.000000 |

**Table S7.** The optimized Cartesian coordinates of the compound **4** calculated at the B3LYP/6-21G(d) level of theory

| Center<br>Number | Atomic<br>Number | Coordinates (Angstroms) |          |          |
|------------------|------------------|-------------------------|----------|----------|
|                  |                  | X                       | Y        | Z        |
| 1                | 6                | 0.000000                | 3.491077 | 2.476349 |
| 2                | 6                | 0.000000                | 4.903207 | 2.476662 |
| 3                | 6                | 0.000000                | 5.909199 | 3.495245 |
| 4                | 6                | 0.000000                | 5.908949 | 4.895833 |
| 5                | 6                | 0.000000                | 4.902682 | 5.914126 |
| 6                | 6                | 0.000000                | 3.490741 | 5.914352 |
| 7                | 6                | 0.000000                | 2.478968 | 4.901927 |
| 8                | 6                | 0.000000                | 2.479036 | 3.488578 |
| 9                | 6                | 0.000000                | 1.258476 | 5.578350 |
| 10               | 6                | 0.000000                | 2.814561 | 7.134231 |
| 11               | 6                | 0.000000                | 5.584812 | 7.130869 |
| 12               | 6                | 0.000000                | 7.144126 | 5.566975 |
| 13               | 6                | 0.000000                | 7.144579 | 2.824479 |
| 14               | 6                | 0.000000                | 5.585718 | 1.260152 |
| 15               | 6                | 0.000000                | 2.815140 | 1.256536 |
| 16               | 6                | 0.000000                | 1.258642 | 2.811903 |
| 17               | 8                | 0.000000                | 1.444812 | 6.947393 |
| 18               | 8                | 0.000000                | 6.954053 | 6.942982 |
| 19               | 6                | 0.000000                | 8.374199 | 4.897009 |
| 20               | 6                | 0.000000                | 8.374463 | 3.494779 |

|    |   |          |           |           |
|----|---|----------|-----------|-----------|
| 21 | 8 | 0.000000 | 6.954789  | 1.448337  |
| 22 | 8 | 0.000000 | 1.445344  | 1.442724  |
| 23 | 1 | 0.000000 | 9.307443  | 5.452158  |
| 24 | 1 | 0.000000 | 9.307900  | 2.939956  |
| 25 | 6 | 0.000000 | 3.489841  | 10.867346 |
| 26 | 6 | 0.000000 | 4.902181  | 10.866893 |
| 27 | 6 | 0.000000 | 5.908972  | 11.885258 |
| 28 | 6 | 0.000000 | 5.906254  | 13.284210 |
| 29 | 6 | 0.000000 | 4.893211  | 14.296952 |
| 30 | 6 | 0.000000 | 3.494269  | 14.299242 |
| 31 | 6 | 0.000000 | 2.476152  | 13.292192 |
| 32 | 6 | 0.000000 | 2.476763  | 11.880035 |
| 33 | 6 | 0.000000 | 1.259962  | 13.974622 |
| 34 | 6 | 0.000000 | 2.823724  | 15.534269 |
| 35 | 6 | 0.000000 | 5.570569  | 15.527800 |
| 36 | 6 | 0.000000 | 7.136895  | 13.961883 |
| 37 | 6 | 0.000000 | 7.144197  | 11.214982 |
| 38 | 6 | 0.000000 | 5.585061  | 9.650971  |
| 39 | 6 | 0.000000 | 2.813627  | 9.647904  |
| 40 | 6 | 0.000000 | 1.257259  | 11.203544 |
| 41 | 6 | 0.000000 | 0.000000  | 13.320084 |
| 42 | 8 | 0.000000 | 1.446990  | 15.344018 |
| 43 | 6 | 0.000000 | 3.497408  | 16.762143 |
| 44 | 6 | 0.000000 | 4.900076  | 16.758818 |
| 45 | 8 | 0.000000 | 6.946191  | 15.337449 |
| 46 | 6 | 0.000000 | 8.368114  | 13.291716 |
| 47 | 6 | 0.000000 | 8.371893  | 11.889066 |
| 48 | 8 | 0.000000 | 6.954323  | 9.838424  |
| 49 | 6 | 0.000000 | 4.930850  | 8.390716  |
| 50 | 6 | 0.000000 | 3.469555  | 8.390925  |
| 51 | 8 | 0.000000 | 1.443797  | 9.833546  |
| 52 | 1 | 0.000000 | 2.945363  | 17.697334 |
| 53 | 1 | 0.000000 | 5.455579  | 17.691961 |
| 54 | 1 | 0.000000 | 9.301094  | 13.847503 |
| 55 | 1 | 0.000000 | 9.307275  | 11.337342 |
| 56 | 6 | 0.000000 | -4.903207 | 2.476662  |
| 57 | 6 | 0.000000 | -3.491077 | 2.476349  |
| 58 | 6 | 0.000000 | -2.479036 | 3.488578  |
| 59 | 6 | 0.000000 | -2.478968 | 4.901927  |
| 60 | 6 | 0.000000 | -3.490741 | 5.914352  |
| 61 | 6 | 0.000000 | -4.902682 | 5.914126  |
| 62 | 6 | 0.000000 | -5.908949 | 4.895833  |
| 63 | 6 | 0.000000 | -5.909199 | 3.495245  |
| 64 | 6 | 0.000000 | -7.144126 | 5.566975  |
| 65 | 6 | 0.000000 | -5.584812 | 7.130869  |
| 66 | 6 | 0.000000 | -2.814561 | 7.134231  |
| 67 | 6 | 0.000000 | -1.258476 | 5.578350  |
| 68 | 6 | 0.000000 | -1.258642 | 2.811903  |
| 69 | 6 | 0.000000 | -2.815140 | 1.256536  |
| 70 | 6 | 0.000000 | -5.585718 | 1.260152  |
| 71 | 6 | 0.000000 | -7.144579 | 2.824479  |
| 72 | 6 | 0.000000 | -8.374463 | 3.494779  |
| 73 | 6 | 0.000000 | -8.374199 | 4.897009  |
| 74 | 8 | 0.000000 | -6.954053 | 6.942982  |
| 75 | 8 | 0.000000 | -1.444812 | 6.947393  |
| 76 | 6 | 0.000000 | 0.000000  | 4.925009  |
| 77 | 6 | 0.000000 | 0.000000  | 3.465025  |
| 78 | 8 | 0.000000 | -1.445344 | 1.442724  |
| 79 | 6 | 0.000000 | -3.470564 | 0.000000  |
| 80 | 6 | 0.000000 | -4.931984 | 0.000000  |
| 81 | 8 | 0.000000 | -6.954789 | 1.448337  |
| 82 | 1 | 0.000000 | -9.307900 | 2.939956  |
| 83 | 1 | 0.000000 | -9.307443 | 5.452158  |
| 84 | 6 | 0.000000 | -4.902181 | 10.866893 |
| 85 | 6 | 0.000000 | -3.489841 | 10.867346 |
| 86 | 6 | 0.000000 | -2.476763 | 11.880035 |
| 87 | 6 | 0.000000 | -2.476152 | 13.292192 |
| 88 | 6 | 0.000000 | -3.494269 | 14.299242 |
| 89 | 6 | 0.000000 | -4.893211 | 14.296952 |
| 90 | 6 | 0.000000 | -5.906254 | 13.284210 |
| 91 | 6 | 0.000000 | -5.908972 | 11.885258 |
| 92 | 6 | 0.000000 | -7.136895 | 13.961883 |
| 93 | 6 | 0.000000 | -5.570569 | 15.527800 |
| 94 | 6 | 0.000000 | -2.823724 | 15.534269 |
| 95 | 6 | 0.000000 | -1.259962 | 13.974622 |
| 96 | 6 | 0.000000 | -1.257259 | 11.203544 |
| 97 | 6 | 0.000000 | -2.813627 | 9.647904  |
| 98 | 6 | 0.000000 | -7.144197 | 11.214982 |
| 99 | 6 | 0.000000 | -8.371893 | 11.889066 |

|     |   |          |           |            |
|-----|---|----------|-----------|------------|
| 100 | 6 | 0.000000 | -8.368114 | 13.291716  |
| 101 | 8 | 0.000000 | -6.946191 | 15.337449  |
| 102 | 6 | 0.000000 | -4.900076 | 16.758818  |
| 103 | 6 | 0.000000 | -3.497408 | 16.762143  |
| 104 | 8 | 0.000000 | -1.446990 | 15.344018  |
| 105 | 6 | 0.000000 | 0.000000  | 11.858900  |
| 106 | 8 | 0.000000 | -1.443797 | 9.833546   |
| 107 | 6 | 0.000000 | -3.469555 | 8.390925   |
| 108 | 8 | 0.000000 | -6.954323 | 9.838424   |
| 109 | 1 | 0.000000 | -9.307275 | 11.337342  |
| 110 | 1 | 0.000000 | -9.301094 | 13.847503  |
| 111 | 1 | 0.000000 | -5.455579 | 17.691961  |
| 112 | 1 | 0.000000 | -2.945363 | 17.697334  |
| 113 | 6 | 0.000000 | 3.494269  | -14.299242 |
| 114 | 6 | 0.000000 | 4.893211  | -14.296952 |
| 115 | 6 | 0.000000 | 5.906254  | -13.284210 |
| 116 | 6 | 0.000000 | 5.908972  | -11.885258 |
| 117 | 6 | 0.000000 | 4.902181  | -10.866893 |
| 118 | 6 | 0.000000 | 3.489841  | -10.867346 |
| 119 | 6 | 0.000000 | 2.476763  | -11.880035 |
| 120 | 6 | 0.000000 | 2.476152  | -13.292192 |
| 121 | 6 | 0.000000 | 1.257259  | -11.203544 |
| 122 | 6 | 0.000000 | 2.813627  | -9.647904  |
| 123 | 6 | 0.000000 | 5.585061  | -9.650971  |
| 124 | 6 | 0.000000 | 7.144197  | -11.214982 |
| 125 | 6 | 0.000000 | 7.136895  | -13.961883 |
| 126 | 6 | 0.000000 | 5.570569  | -15.527800 |
| 127 | 6 | 0.000000 | 2.823724  | -15.534269 |
| 128 | 6 | 0.000000 | 1.259962  | -13.974622 |
| 129 | 8 | 0.000000 | 1.443797  | -9.833546  |
| 130 | 8 | 0.000000 | 6.954323  | -9.838424  |
| 131 | 6 | 0.000000 | 8.371893  | -11.889066 |
| 132 | 6 | 0.000000 | 8.368114  | -13.291716 |
| 133 | 8 | 0.000000 | 6.946191  | -15.337449 |
| 134 | 6 | 0.000000 | 4.900076  | -16.758818 |
| 135 | 6 | 0.000000 | 3.497408  | -16.762143 |
| 136 | 8 | 0.000000 | 1.446990  | -15.344018 |
| 137 | 1 | 0.000000 | 9.307275  | -11.337342 |
| 138 | 1 | 0.000000 | 9.301094  | -13.847503 |
| 139 | 1 | 0.000000 | 5.455579  | -17.691961 |
| 140 | 1 | 0.000000 | 2.945363  | -17.697334 |
| 141 | 6 | 0.000000 | 3.490741  | -5.914352  |
| 142 | 6 | 0.000000 | 4.902682  | -5.914126  |
| 143 | 6 | 0.000000 | 5.908949  | -4.895833  |
| 144 | 6 | 0.000000 | 5.909199  | -3.495245  |
| 145 | 6 | 0.000000 | 4.903207  | -2.476662  |
| 146 | 6 | 0.000000 | 3.491077  | -2.476349  |
| 147 | 6 | 0.000000 | 2.479036  | -3.488578  |
| 148 | 6 | 0.000000 | 2.478968  | -4.901927  |
| 149 | 6 | 0.000000 | 1.258642  | -2.811903  |
| 150 | 6 | 0.000000 | 2.815140  | -1.256536  |
| 151 | 6 | 0.000000 | 5.585718  | -1.260152  |
| 152 | 6 | 0.000000 | 7.144579  | -2.824479  |
| 153 | 6 | 0.000000 | 7.144126  | -5.566975  |
| 154 | 6 | 0.000000 | 5.584812  | -7.130869  |
| 155 | 6 | 0.000000 | 2.814561  | -7.134231  |
| 156 | 6 | 0.000000 | 1.258476  | -5.578350  |
| 157 | 6 | 0.000000 | 0.000000  | -3.465025  |
| 158 | 8 | 0.000000 | 1.445344  | -1.442724  |
| 159 | 6 | 0.000000 | 3.470564  | 0.000000   |
| 160 | 6 | 0.000000 | 4.931984  | 0.000000   |
| 161 | 8 | 0.000000 | 6.954789  | -1.448337  |
| 162 | 6 | 0.000000 | 8.374463  | -3.494779  |
| 163 | 6 | 0.000000 | 8.374199  | -4.897009  |
| 164 | 8 | 0.000000 | 6.954053  | -6.942982  |
| 165 | 6 | 0.000000 | 4.930850  | -8.390716  |
| 166 | 6 | 0.000000 | 3.469555  | -8.390925  |
| 167 | 8 | 0.000000 | 1.444812  | -6.947393  |
| 168 | 1 | 0.000000 | 9.307900  | -2.939956  |
| 169 | 1 | 0.000000 | 9.307443  | -5.452158  |
| 170 | 6 | 0.000000 | -4.893211 | -14.296952 |
| 171 | 6 | 0.000000 | -3.494269 | -14.299242 |
| 172 | 6 | 0.000000 | -2.476152 | -13.292192 |
| 173 | 6 | 0.000000 | -2.476763 | -11.880035 |
| 174 | 6 | 0.000000 | -3.489841 | -10.867346 |
| 175 | 6 | 0.000000 | -4.902181 | -10.866893 |
| 176 | 6 | 0.000000 | -5.908972 | -11.885258 |
| 177 | 6 | 0.000000 | -5.906254 | -13.284210 |
| 178 | 6 | 0.000000 | -7.144197 | -11.214982 |

|     |   |          |           |            |
|-----|---|----------|-----------|------------|
| 179 | 6 | 0.000000 | -5.585061 | -9.650971  |
| 180 | 6 | 0.000000 | -2.813627 | -9.647904  |
| 181 | 6 | 0.000000 | -1.257259 | -11.203544 |
| 182 | 6 | 0.000000 | -1.259962 | -13.974622 |
| 183 | 6 | 0.000000 | -2.823724 | -15.534269 |
| 184 | 6 | 0.000000 | -5.570569 | -15.527800 |
| 185 | 6 | 0.000000 | -7.136895 | -13.961883 |
| 186 | 6 | 0.000000 | -8.368114 | -13.291716 |
| 187 | 6 | 0.000000 | -8.371893 | -11.889066 |
| 188 | 8 | 0.000000 | -6.954323 | -9.838424  |
| 189 | 8 | 0.000000 | -1.443797 | -9.833546  |
| 190 | 6 | 0.000000 | 0.000000  | -11.858900 |
| 191 | 6 | 0.000000 | 0.000000  | -13.320084 |
| 192 | 8 | 0.000000 | -1.446990 | -15.344018 |
| 193 | 6 | 0.000000 | -3.497408 | -16.762143 |
| 194 | 6 | 0.000000 | -4.900076 | -16.758818 |
| 195 | 8 | 0.000000 | -6.946191 | -15.337449 |
| 196 | 1 | 0.000000 | -9.301094 | -13.847503 |
| 197 | 1 | 0.000000 | -9.307275 | -11.337342 |
| 198 | 1 | 0.000000 | -2.945363 | -17.697334 |
| 199 | 1 | 0.000000 | -5.455579 | -17.691961 |
| 200 | 6 | 0.000000 | -4.902682 | -5.914126  |
| 201 | 6 | 0.000000 | -3.490741 | -5.914352  |
| 202 | 6 | 0.000000 | -2.478968 | -4.901927  |
| 203 | 6 | 0.000000 | -2.479036 | -3.488578  |
| 204 | 6 | 0.000000 | -3.491077 | -2.476349  |
| 205 | 6 | 0.000000 | -4.903207 | -2.476662  |
| 206 | 6 | 0.000000 | -5.909199 | -3.495245  |
| 207 | 6 | 0.000000 | -5.908949 | -4.895833  |
| 208 | 6 | 0.000000 | -7.144579 | -2.824479  |
| 209 | 6 | 0.000000 | -5.585718 | -1.260152  |
| 210 | 6 | 0.000000 | -2.815140 | -1.256536  |
| 211 | 6 | 0.000000 | -1.258642 | -2.811903  |
| 212 | 6 | 0.000000 | -1.258476 | -5.578350  |
| 213 | 6 | 0.000000 | -2.814561 | -7.134231  |
| 214 | 6 | 0.000000 | -5.584812 | -7.130869  |
| 215 | 6 | 0.000000 | -7.144126 | -5.566975  |
| 216 | 6 | 0.000000 | -8.374199 | -4.897009  |
| 217 | 6 | 0.000000 | -8.374463 | -3.494779  |
| 218 | 8 | 0.000000 | -6.954789 | -1.448337  |
| 219 | 8 | 0.000000 | -1.445344 | -1.442724  |
| 220 | 6 | 0.000000 | 0.000000  | -4.925009  |
| 221 | 8 | 0.000000 | -1.444812 | -6.947393  |
| 222 | 6 | 0.000000 | -3.469555 | -8.390925  |
| 223 | 6 | 0.000000 | -4.930850 | -8.390716  |
| 224 | 8 | 0.000000 | -6.954053 | -6.942982  |
| 225 | 1 | 0.000000 | -9.307443 | -5.452158  |
| 226 | 1 | 0.000000 | -9.307900 | -2.939956  |
| 227 | 6 | 0.000000 | -5.585061 | 9.650971   |
| 228 | 6 | 0.000000 | -4.930850 | 8.390716   |

-----

**Table S8.** The optimized Cartesian coordinates of the compound **5** calculated at the B3LYP/6–21G(d) level of theory

| Center<br>Number | Atomic<br>Number | Coordinates (Angstroms) |           |           |
|------------------|------------------|-------------------------|-----------|-----------|
|                  |                  | X                       | Y         | Z         |
| 1                | 6                | 10.656674               | -0.965946 | 3.491030  |
| 2                | 6                | 10.634954               | -0.963533 | 4.904698  |
| 3                | 6                | 10.587340               | 0.053257  | 5.914781  |
| 4                | 6                | 10.487424               | 1.452083  | 5.914781  |
| 5                | 6                | 10.390036               | 2.465318  | 4.904698  |
| 6                | 6                | 10.411192               | 2.470794  | 3.491030  |
| 7                | 6                | 10.550376               | 1.464255  | 2.479208  |
| 8                | 6                | 10.651383               | 0.050156  | 2.479208  |
| 9                | 6                | 10.391176               | 2.125394  | 1.259496  |
| 10               | 6                | 10.123751               | 3.659838  | 2.814135  |
| 11               | 6                | 10.075850               | 3.645346  | 5.579734  |
| 12               | 6                | 10.264486               | 2.102200  | 7.142341  |
| 13               | 6                | 10.459067               | -0.621947 | 7.142341  |
| 14               | 6                | 10.491678               | -2.176237 | 5.579734  |
| 15               | 6                | 10.541152               | -2.183774 | 2.814135  |
| 16               | 6                | 10.587768               | -0.626898 | 1.259496  |
| 17               | 8                | 10.141710               | 3.470841  | 1.445013  |
| 18               | 8                | 10.031704               | 3.455197  | 6.945770  |
| 19               | 6                | 10.202952               | 1.430570  | 8.368991  |
| 20               | 6                | 10.302699               | 0.034119  | 8.368991  |
| 21               | 8                | 10.420954               | -1.994293 | 6.945770  |
| 22               | 8                | 10.532066               | -1.994143 | 1.445013  |
| 23               | 1                | 10.036761               | 1.978297  | 9.291538  |
| 24               | 1                | 10.216044               | -0.531669 | 9.291538  |
| 25               | 6                | 8.218433                | 6.852379  | 3.491030  |
| 26               | 6                | 8.201369                | 6.838727  | 4.904698  |
| 27               | 6                | 7.448721                | 7.524038  | 5.914781  |
| 28               | 6                | 6.388951                | 8.442506  | 5.914781  |
| 29               | 6                | 5.603622                | 9.090108  | 4.904698  |
| 30               | 6                | 5.614710                | 9.108940  | 3.491030  |
| 31               | 6                | 6.424857                | 8.495627  | 2.479208  |
| 32               | 6                | 7.496199                | 7.567131  | 2.479208  |
| 33               | 6                | 5.844791                | 8.850551  | 1.259496  |
| 34               | 6                | 4.570676                | 9.746470  | 2.814135  |
| 35               | 6                | 4.547053                | 9.702351  | 5.579734  |
| 36               | 6                | 5.771607                | 8.744567  | 7.142341  |
| 37               | 6                | 7.835460                | 6.955895  | 7.142341  |
| 38               | 6                | 8.957569                | 5.879904  | 5.579734  |
| 39               | 6                | 8.997881                | 5.909559  | 2.814135  |
| 40               | 6                | 7.929966                | 7.043399  | 1.259496  |
| 41               | 6                | 6.344559                | 8.433120  | 0.000000  |
| 42               | 8                | 4.717017                | 9.625527  | 1.445013  |
| 43               | 8                | 4.650293                | 9.536679  | 6.945770  |
| 44               | 6                | 6.203011                | 8.226142  | 8.368991  |
| 45               | 6                | 7.260982                | 7.309234  | 8.368991  |
| 46               | 8                | 8.778905                | 5.958549  | 6.945770  |
| 47               | 6                | 9.642446                | 4.825550  | 4.921974  |
| 48               | 6                | 9.663631                | 4.836152  | 3.464592  |
| 49               | 8                | 8.857367                | 6.037223  | 1.445013  |
| 50               | 1                | 5.698194                | 8.495929  | 9.291538  |
| 51               | 1                | 7.599780                | 6.847887  | 9.291538  |
| 52               | 6                | 10.634954               | -0.963533 | -4.904698 |
| 53               | 6                | 10.656674               | -0.965946 | -3.491030 |
| 54               | 6                | 10.651383               | 0.050156  | -2.479208 |
| 55               | 6                | 10.550376               | 1.464255  | -2.479208 |
| 56               | 6                | 10.411192               | 2.470794  | -3.491030 |
| 57               | 6                | 10.390036               | 2.465318  | -4.904698 |
| 58               | 6                | 10.487424               | 1.452083  | -5.914781 |
| 59               | 6                | 10.587340               | 0.053257  | -5.914781 |
| 60               | 6                | 10.264486               | 2.102200  | -7.142341 |
| 61               | 6                | 10.075850               | 3.645346  | -5.579734 |
| 62               | 6                | 10.123751               | 3.659838  | -2.814135 |
| 63               | 6                | 10.391176               | 2.125394  | -1.259496 |
| 64               | 6                | 10.587768               | -0.626898 | -1.259496 |
| 65               | 6                | 10.541152               | -2.183774 | -2.814135 |
| 66               | 6                | 10.491678               | -2.176237 | -5.579734 |
| 67               | 6                | 10.459067               | -0.621947 | -7.142341 |
| 68               | 6                | 10.302699               | 0.034119  | -8.368991 |
| 69               | 6                | 10.202952               | 1.430570  | -8.368991 |
| 70               | 8                | 10.031704               | 3.455197  | -6.945770 |

|     |   |           |            |           |
|-----|---|-----------|------------|-----------|
| 71  | 8 | 10.141710 | 3.470841   | -1.445013 |
| 72  | 6 | 10.449398 | 1.476836   | 0.000000  |
| 73  | 6 | 10.553218 | 0.023351   | 0.000000  |
| 74  | 8 | 10.532066 | -1.994143  | -1.445013 |
| 75  | 6 | 10.252895 | -3.413543  | -3.464592 |
| 76  | 6 | 10.230418 | -3.406060  | -4.921974 |
| 77  | 8 | 10.420954 | -1.994293  | -6.945770 |
| 78  | 1 | 10.216044 | -0.531669  | -9.291538 |
| 79  | 1 | 10.036761 | 1.978297   | -9.291538 |
| 80  | 6 | 8.201369  | 6.838727   | -4.904698 |
| 81  | 6 | 8.218433  | 6.852379   | -3.491030 |
| 82  | 6 | 7.496199  | 7.567131   | -2.479208 |
| 83  | 6 | 6.424857  | 8.495627   | -2.479208 |
| 84  | 6 | 5.614710  | 9.108940   | -3.491030 |
| 85  | 6 | 5.603622  | 9.090108   | -4.904698 |
| 86  | 6 | 6.388951  | 8.442506   | -5.914781 |
| 87  | 6 | 7.448721  | 7.524038   | -5.914781 |
| 88  | 6 | 5.771607  | 8.744567   | -7.142341 |
| 89  | 6 | 4.547053  | 9.702351   | -5.579734 |
| 90  | 6 | 4.570676  | 9.746470   | -2.814135 |
| 91  | 6 | 5.844791  | 8.850551   | -1.259496 |
| 92  | 6 | 7.929966  | 7.043399   | -1.259496 |
| 93  | 6 | 8.997881  | 5.909559   | -2.814135 |
| 94  | 6 | 7.835460  | 6.955895   | -7.142341 |
| 95  | 6 | 7.260982  | 7.309234   | -8.368991 |
| 96  | 6 | 6.203011  | 8.226142   | -8.368991 |
| 97  | 8 | 4.650293  | 9.536679   | -6.945770 |
| 98  | 8 | 4.717017  | 9.625527   | -1.445013 |
| 99  | 6 | 7.445740  | 7.478764   | 0.000000  |
| 100 | 8 | 8.857367  | 6.037223   | -1.445013 |
| 101 | 6 | 9.663631  | 4.836152   | -3.464592 |
| 102 | 8 | 8.778905  | 5.958549   | -6.945770 |
| 103 | 1 | 7.599780  | 6.847887   | -9.291538 |
| 104 | 1 | 5.698194  | 8.495929   | -9.291538 |
| 105 | 6 | -0.965946 | -10.656674 | 3.491030  |
| 106 | 6 | -0.963533 | -10.634954 | 4.904698  |
| 107 | 6 | 0.053257  | -10.587340 | 5.914781  |
| 108 | 6 | 1.452083  | -10.487424 | 5.914781  |
| 109 | 6 | 2.465318  | -10.390036 | 4.904698  |
| 110 | 6 | 2.470794  | -10.411192 | 3.491030  |
| 111 | 6 | 1.464255  | -10.550376 | 2.479208  |
| 112 | 6 | 0.050156  | -10.651383 | 2.479208  |
| 113 | 6 | 2.125394  | -10.391176 | 1.259496  |
| 114 | 6 | 3.659838  | -10.123751 | 2.814135  |
| 115 | 6 | 3.645346  | -10.075850 | 5.579734  |
| 116 | 6 | 2.102200  | -10.264486 | 7.142341  |
| 117 | 6 | -0.621947 | -10.459067 | 7.142341  |
| 118 | 6 | -2.176237 | -10.491678 | 5.579734  |
| 119 | 6 | -2.183774 | -10.541152 | 2.814135  |
| 120 | 6 | -0.626898 | -10.587768 | 1.259496  |
| 121 | 8 | 3.470841  | -10.141710 | 1.445013  |
| 122 | 8 | 3.455197  | -10.031704 | 6.945770  |
| 123 | 6 | 1.430570  | -10.202952 | 8.368991  |
| 124 | 6 | 0.034119  | -10.302699 | 8.368991  |
| 125 | 8 | -1.994293 | -10.420954 | 6.945770  |
| 126 | 8 | -1.994143 | -10.532066 | 1.445013  |
| 127 | 1 | 1.978297  | -10.036761 | 9.291538  |
| 128 | 1 | -0.531669 | -10.216044 | 9.291538  |
| 129 | 6 | 6.852379  | -8.218433  | 3.491030  |
| 130 | 6 | 6.838727  | -8.201369  | 4.904698  |
| 131 | 6 | 7.524038  | -7.448721  | 5.914781  |
| 132 | 6 | 8.442506  | -6.388951  | 5.914781  |
| 133 | 6 | 9.090108  | -5.603622  | 4.904698  |
| 134 | 6 | 9.108940  | -5.614710  | 3.491030  |
| 135 | 6 | 8.495627  | -6.424857  | 2.479208  |
| 136 | 6 | 7.567131  | -7.496199  | 2.479208  |
| 137 | 6 | 8.850551  | -5.844791  | 1.259496  |
| 138 | 6 | 9.746470  | -4.570676  | 2.814135  |
| 139 | 6 | 9.702351  | -4.547053  | 5.579734  |
| 140 | 6 | 8.744567  | -5.771607  | 7.142341  |
| 141 | 6 | 6.955895  | -7.835460  | 7.142341  |
| 142 | 6 | 5.879904  | -8.957569  | 5.579734  |
| 143 | 6 | 5.909559  | -8.997881  | 2.814135  |
| 144 | 6 | 7.043399  | -7.929966  | 1.259496  |
| 145 | 6 | 8.433120  | -6.344559  | 0.000000  |
| 146 | 8 | 9.625527  | -4.717017  | 1.445013  |
| 147 | 6 | 10.252895 | -3.413543  | 3.464592  |
| 148 | 6 | 10.230418 | -3.406060  | 4.921974  |
| 149 | 8 | 9.536679  | -4.650293  | 6.945770  |



|     |   |           |            |           |
|-----|---|-----------|------------|-----------|
| 150 | 6 | 8.226142  | -6.203011  | 8.368991  |
| 151 | 6 | 7.309234  | -7.260982  | 8.368991  |
| 152 | 8 | 5.958549  | -8.778905  | 6.945770  |
| 153 | 6 | 4.825550  | -9.642446  | 4.921974  |
| 154 | 6 | 4.836152  | -9.663631  | 3.464592  |
| 155 | 8 | 6.037223  | -8.857367  | 1.445013  |
| 156 | 1 | 8.495929  | -5.698194  | 9.291538  |
| 157 | 1 | 6.847887  | -7.599780  | 9.291538  |
| 158 | 6 | -0.963533 | -10.634954 | -4.904698 |
| 159 | 6 | -0.965946 | -10.656674 | -3.491030 |
| 160 | 6 | 0.050156  | -10.651383 | -2.479208 |
| 161 | 6 | 1.464255  | -10.550376 | -2.479208 |
| 162 | 6 | 2.470794  | -10.411192 | -3.491030 |
| 163 | 6 | 2.465318  | -10.390036 | -4.904698 |
| 164 | 6 | 1.452083  | -10.487424 | -5.914781 |
| 165 | 6 | 0.053257  | -10.587340 | -5.914781 |
| 166 | 6 | 2.102200  | -10.264486 | -7.142341 |
| 167 | 6 | 3.645346  | -10.075850 | -5.579734 |
| 168 | 6 | 3.659838  | -10.123751 | -2.814135 |
| 169 | 6 | 2.125394  | -10.391176 | -1.259496 |
| 170 | 6 | -0.626898 | -10.587768 | -1.259496 |
| 171 | 6 | -2.183774 | -10.541152 | -2.814135 |
| 172 | 6 | -2.176237 | -10.491678 | -5.579734 |
| 173 | 6 | -0.621947 | -10.459067 | -7.142341 |
| 174 | 6 | 0.034119  | -10.302699 | -8.368991 |
| 175 | 6 | 1.430570  | -10.202952 | -8.368991 |
| 176 | 8 | 3.455197  | -10.031704 | -6.945770 |
| 177 | 8 | 3.470841  | -10.141710 | -1.445013 |
| 178 | 6 | 1.476836  | -10.449398 | 0.000000  |
| 179 | 6 | 0.023351  | -10.553218 | 0.000000  |
| 180 | 8 | -1.994143 | -10.532066 | -1.445013 |
| 181 | 8 | -1.994293 | -10.420954 | -6.945770 |
| 182 | 1 | -0.531669 | -10.216044 | -9.291538 |
| 183 | 1 | 1.978297  | -10.036761 | -9.291538 |
| 184 | 6 | 6.838727  | -8.201369  | -4.904698 |
| 185 | 6 | 6.852379  | -8.218433  | -3.491030 |
| 186 | 6 | 7.567131  | -7.496199  | -2.479208 |
| 187 | 6 | 8.495627  | -6.424857  | -2.479208 |
| 188 | 6 | 9.108940  | -5.614710  | -3.491030 |
| 189 | 6 | 9.090108  | -5.603622  | -4.904698 |
| 190 | 6 | 8.442506  | -6.388951  | -5.914781 |
| 191 | 6 | 7.524038  | -7.448721  | -5.914781 |
| 192 | 6 | 8.744567  | -5.771607  | -7.142341 |
| 193 | 6 | 9.702351  | -4.547053  | -5.579734 |
| 194 | 6 | 9.746470  | -4.570676  | -2.814135 |
| 195 | 6 | 8.850551  | -5.844791  | -1.259496 |
| 196 | 6 | 7.043399  | -7.929966  | -1.259496 |
| 197 | 6 | 5.909559  | -8.997881  | -2.814135 |
| 198 | 6 | 5.879904  | -8.957569  | -5.579734 |
| 199 | 6 | 6.955895  | -7.835460  | -7.142341 |
| 200 | 6 | 7.309234  | -7.260982  | -8.368991 |
| 201 | 6 | 8.226142  | -6.203011  | -8.368991 |
| 202 | 8 | 9.536679  | -4.650293  | -6.945770 |
| 203 | 8 | 9.625527  | -4.717017  | -1.445013 |
| 204 | 6 | 7.478764  | -7.445740  | 0.000000  |
| 205 | 8 | 6.037223  | -8.857367  | -1.445013 |
| 206 | 6 | 4.836152  | -9.663631  | -3.464592 |
| 207 | 6 | 4.825550  | -9.642446  | -4.921974 |
| 208 | 8 | 5.958549  | -8.778905  | -6.945770 |
| 209 | 1 | 6.847887  | -7.599780  | -9.291538 |
| 210 | 1 | 8.495929  | -5.698194  | -9.291538 |
| 211 | 6 | 8.957569  | 5.879904   | -5.579734 |
| 212 | 6 | 9.642446  | 4.825550   | -4.921974 |
| 213 | 6 | -9.108940 | 5.614710   | -3.491030 |
| 214 | 6 | -9.090108 | 5.603622   | -4.904698 |
| 215 | 6 | -8.442506 | 6.388951   | -5.914781 |
| 216 | 6 | -7.524038 | 7.448721   | -5.914781 |
| 217 | 6 | -6.838727 | 8.201369   | -4.904698 |
| 218 | 6 | -6.852379 | 8.218433   | -3.491030 |
| 219 | 6 | -7.567131 | 7.496199   | -2.479208 |
| 220 | 6 | -8.495627 | 6.424857   | -2.479208 |
| 221 | 6 | -7.043399 | 7.929966   | -1.259496 |
| 222 | 6 | -5.909559 | 8.997881   | -2.814135 |
| 223 | 6 | -5.879904 | 8.957569   | -5.579734 |
| 224 | 6 | -6.955895 | 7.835460   | -7.142341 |
| 225 | 6 | -8.744567 | 5.771607   | -7.142341 |
| 226 | 6 | -9.702351 | 4.547053   | -5.579734 |
| 227 | 6 | -9.746470 | 4.570676   | -2.814135 |
| 228 | 6 | -8.850551 | 5.844791   | -1.259496 |

|     |   |            |           |           |
|-----|---|------------|-----------|-----------|
| 229 | 8 | -6.037223  | 8.857367  | -1.445013 |
| 230 | 8 | -5.958549  | 8.778905  | -6.945770 |
| 231 | 6 | -7.309234  | 7.260982  | -8.368991 |
| 232 | 6 | -8.226142  | 6.203011  | -8.368991 |
| 233 | 8 | -9.536679  | 4.650293  | -6.945770 |
| 234 | 8 | -9.625527  | 4.717017  | -1.445013 |
| 235 | 1 | -6.847887  | 7.599780  | -9.291538 |
| 236 | 1 | -8.495929  | 5.698194  | -9.291538 |
| 237 | 6 | -2.470794  | 10.411192 | -3.491030 |
| 238 | 6 | -2.465318  | 10.390036 | -4.904698 |
| 239 | 6 | -1.452083  | 10.487424 | -5.914781 |
| 240 | 6 | -0.053257  | 10.587340 | -5.914781 |
| 241 | 6 | 0.963533   | 10.634954 | -4.904698 |
| 242 | 6 | 0.965946   | 10.656674 | -3.491030 |
| 243 | 6 | -0.050156  | 10.651383 | -2.479208 |
| 244 | 6 | -1.464255  | 10.550376 | -2.479208 |
| 245 | 6 | 0.626898   | 10.587768 | -1.259496 |
| 246 | 6 | 2.183774   | 10.541152 | -2.814135 |
| 247 | 6 | 2.176237   | 10.491678 | -5.579734 |
| 248 | 6 | 0.621947   | 10.459067 | -7.142341 |
| 249 | 6 | -2.102200  | 10.264486 | -7.142341 |
| 250 | 6 | -3.645346  | 10.075850 | -5.579734 |
| 251 | 6 | -3.659838  | 10.123751 | -2.814135 |
| 252 | 6 | -2.125394  | 10.391176 | -1.259496 |
| 253 | 6 | -0.023351  | 10.553218 | 0.000000  |
| 254 | 8 | 1.994143   | 10.532066 | -1.445013 |
| 255 | 6 | 3.413543   | 10.252895 | -3.464592 |
| 256 | 6 | 3.406060   | 10.230418 | -4.921974 |
| 257 | 8 | 1.994293   | 10.420954 | -6.945770 |
| 258 | 6 | -0.034119  | 10.302699 | -8.368991 |
| 259 | 6 | -1.430570  | 10.202952 | -8.368991 |
| 260 | 8 | -3.455197  | 10.031704 | -6.945770 |
| 261 | 6 | -4.825550  | 9.642446  | -4.921974 |
| 262 | 6 | -4.836152  | 9.663631  | -3.464592 |
| 263 | 8 | -3.470841  | 10.141710 | -1.445013 |
| 264 | 1 | 0.531669   | 10.216044 | -9.291538 |
| 265 | 1 | -1.978297  | 10.036761 | -9.291538 |
| 266 | 6 | -9.090108  | 5.603622  | 4.904698  |
| 267 | 6 | -9.108940  | 5.614710  | 3.491030  |
| 268 | 6 | -8.495627  | 6.424857  | 2.479208  |
| 269 | 6 | -7.567131  | 7.496199  | 2.479208  |
| 270 | 6 | -6.852379  | 8.218433  | 3.491030  |
| 271 | 6 | -6.838727  | 8.201369  | 4.904698  |
| 272 | 6 | -7.524038  | 7.448721  | 5.914781  |
| 273 | 6 | -8.442506  | 6.388951  | 5.914781  |
| 274 | 6 | -6.955895  | 7.835460  | 7.142341  |
| 275 | 6 | -5.879904  | 8.957569  | 5.579734  |
| 276 | 6 | -5.909559  | 8.997881  | 2.814135  |
| 277 | 6 | -7.043399  | 7.929966  | 1.259496  |
| 278 | 6 | -8.850551  | 5.844791  | 1.259496  |
| 279 | 6 | -9.746470  | 4.570676  | 2.814135  |
| 280 | 6 | -9.702351  | 4.547053  | 5.579734  |
| 281 | 6 | -8.744567  | 5.771607  | 7.142341  |
| 282 | 6 | -8.226142  | 6.203011  | 8.368991  |
| 283 | 6 | -7.309234  | 7.260982  | 8.368991  |
| 284 | 8 | -5.958549  | 8.778905  | 6.945770  |
| 285 | 8 | -6.037223  | 8.857367  | 1.445013  |
| 286 | 6 | -7.478764  | 7.445740  | 0.000000  |
| 287 | 6 | -8.433120  | 6.344559  | 0.000000  |
| 288 | 8 | -9.625527  | 4.717017  | 1.445013  |
| 289 | 6 | -10.252895 | 3.413543  | 3.464592  |
| 290 | 6 | -10.230418 | 3.406060  | 4.921974  |
| 291 | 8 | -9.536679  | 4.650293  | 6.945770  |
| 292 | 1 | -8.495929  | 5.698194  | 9.291538  |
| 293 | 1 | -6.847887  | 7.599780  | 9.291538  |
| 294 | 6 | -2.465318  | 10.390036 | 4.904698  |
| 295 | 6 | -2.470794  | 10.411192 | 3.491030  |
| 296 | 6 | -1.464255  | 10.550376 | 2.479208  |
| 297 | 6 | -0.050156  | 10.651383 | 2.479208  |
| 298 | 6 | 0.965946   | 10.656674 | 3.491030  |
| 299 | 6 | 0.963533   | 10.634954 | 4.904698  |
| 300 | 6 | -0.053257  | 10.587340 | 5.914781  |
| 301 | 6 | -1.452083  | 10.487424 | 5.914781  |
| 302 | 6 | 0.621947   | 10.459067 | 7.142341  |
| 303 | 6 | 2.176237   | 10.491678 | 5.579734  |
| 304 | 6 | 2.183774   | 10.541152 | 2.814135  |
| 305 | 6 | 0.626898   | 10.587768 | 1.259496  |
| 306 | 6 | -2.125394  | 10.391176 | 1.259496  |
| 307 | 6 | -3.659838  | 10.123751 | 2.814135  |

|     |   |            |            |           |
|-----|---|------------|------------|-----------|
| 308 | 6 | -2.102200  | 10.264486  | 7.142341  |
| 309 | 6 | -1.430570  | 10.202952  | 8.368991  |
| 310 | 6 | -0.034119  | 10.302699  | 8.368991  |
| 311 | 8 | 1.994293   | 10.420954  | 6.945770  |
| 312 | 6 | 3.406060   | 10.230418  | 4.921974  |
| 313 | 6 | 3.413543   | 10.252895  | 3.464592  |
| 314 | 8 | 1.994143   | 10.532066  | 1.445013  |
| 315 | 6 | -1.476836  | 10.449398  | 0.000000  |
| 316 | 8 | -3.470841  | 10.141710  | 1.445013  |
| 317 | 6 | -4.836152  | 9.663631   | 3.464592  |
| 318 | 8 | -3.455197  | 10.031704  | 6.945770  |
| 319 | 1 | -1.978297  | 10.036761  | 9.291538  |
| 320 | 1 | 0.531669   | 10.216044  | 9.291538  |
| 321 | 6 | -5.614710  | -9.108940  | -3.491030 |
| 322 | 6 | -5.603622  | -9.090108  | -4.904698 |
| 323 | 6 | -6.388951  | -8.442506  | -5.914781 |
| 324 | 6 | -7.448721  | -7.524038  | -5.914781 |
| 325 | 6 | -8.201369  | -6.838727  | -4.904698 |
| 326 | 6 | -8.218433  | -6.852379  | -3.491030 |
| 327 | 6 | -7.496199  | -7.567131  | -2.479208 |
| 328 | 6 | -6.424857  | -8.495627  | -2.479208 |
| 329 | 6 | -7.929966  | -7.043399  | -1.259496 |
| 330 | 6 | -8.997881  | -5.909559  | -2.814135 |
| 331 | 6 | -8.957569  | -5.879904  | -5.579734 |
| 332 | 6 | -7.835460  | -6.955895  | -7.142341 |
| 333 | 6 | -5.771607  | -8.744567  | -7.142341 |
| 334 | 6 | -4.547053  | -9.702351  | -5.579734 |
| 335 | 6 | -4.570676  | -9.746470  | -2.814135 |
| 336 | 6 | -5.844791  | -8.850551  | -1.259496 |
| 337 | 8 | -8.857367  | -6.037223  | -1.445013 |
| 338 | 8 | -8.778905  | -5.958549  | -6.945770 |
| 339 | 6 | -7.260982  | -7.309234  | -8.368991 |
| 340 | 6 | -6.203011  | -8.226142  | -8.368991 |
| 341 | 8 | -4.650293  | -9.536679  | -6.945770 |
| 342 | 6 | -3.406060  | -10.230418 | -4.921974 |
| 343 | 6 | -3.413543  | -10.252895 | -3.464592 |
| 344 | 8 | -4.717017  | -9.625527  | -1.445013 |
| 345 | 1 | -7.599780  | -6.847887  | -9.291538 |
| 346 | 1 | -5.698194  | -8.495929  | -9.291538 |
| 347 | 6 | -10.411192 | -2.470794  | -3.491030 |
| 348 | 6 | -10.390036 | -2.465318  | -4.904698 |
| 349 | 6 | -10.487424 | -1.452083  | -5.914781 |
| 350 | 6 | -10.587340 | -0.053257  | -5.914781 |
| 351 | 6 | -10.634954 | 0.963533   | -4.904698 |
| 352 | 6 | -10.656674 | 0.965946   | -3.491030 |
| 353 | 6 | -10.651383 | -0.050156  | -2.479208 |
| 354 | 6 | -10.550376 | -1.464255  | -2.479208 |
| 355 | 6 | -10.587768 | 0.626898   | -1.259496 |
| 356 | 6 | -10.541152 | 2.183774   | -2.814135 |
| 357 | 6 | -10.491678 | 2.176237   | -5.579734 |
| 358 | 6 | -10.459067 | 0.621947   | -7.142341 |
| 359 | 6 | -10.264486 | -2.102200  | -7.142341 |
| 360 | 6 | -10.075850 | -3.645346  | -5.579734 |
| 361 | 6 | -10.123751 | -3.659838  | -2.814135 |
| 362 | 6 | -10.391176 | -2.125394  | -1.259496 |
| 363 | 6 | -10.553218 | -0.023351  | 0.000000  |
| 364 | 8 | -10.532066 | 1.994143   | -1.445013 |
| 365 | 6 | -10.252895 | 3.413543   | -3.464592 |
| 366 | 6 | -10.230418 | 3.406060   | -4.921974 |
| 367 | 8 | -10.420954 | 1.994293   | -6.945770 |
| 368 | 6 | -10.302699 | -0.034119  | -8.368991 |
| 369 | 6 | -10.202952 | -1.430570  | -8.368991 |
| 370 | 8 | -10.031704 | -3.455197  | -6.945770 |
| 371 | 6 | -9.642446  | -4.825550  | -4.921974 |
| 372 | 6 | -9.663631  | -4.836152  | -3.464592 |
| 373 | 8 | -10.141710 | -3.470841  | -1.445013 |
| 374 | 1 | -10.216044 | 0.531669   | -9.291538 |
| 375 | 1 | -10.036761 | -1.978297  | -9.291538 |
| 376 | 6 | -5.603622  | -9.090108  | 4.904698  |
| 377 | 6 | -5.614710  | -9.108940  | 3.491030  |
| 378 | 6 | -6.424857  | -8.495627  | 2.479208  |
| 379 | 6 | -7.496199  | -7.567131  | 2.479208  |
| 380 | 6 | -8.218433  | -6.852379  | 3.491030  |
| 381 | 6 | -8.201369  | -6.838727  | 4.904698  |
| 382 | 6 | -7.448721  | -7.524038  | 5.914781  |
| 383 | 6 | -6.388951  | -8.442506  | 5.914781  |
| 384 | 6 | -7.835460  | -6.955895  | 7.142341  |
| 385 | 6 | -8.957569  | -5.879904  | 5.579734  |
| 386 | 6 | -8.997881  | -5.909559  | 2.814135  |

|     |   |            |            |          |
|-----|---|------------|------------|----------|
| 387 | 6 | -7.929966  | -7.043399  | 1.259496 |
| 388 | 6 | -5.844791  | -8.850551  | 1.259496 |
| 389 | 6 | -4.570676  | -9.746470  | 2.814135 |
| 390 | 6 | -4.547053  | -9.702351  | 5.579734 |
| 391 | 6 | -5.771607  | -8.744567  | 7.142341 |
| 392 | 6 | -6.203011  | -8.226142  | 8.368991 |
| 393 | 6 | -7.260982  | -7.309234  | 8.368991 |
| 394 | 8 | -8.778905  | -5.958549  | 6.945770 |
| 395 | 8 | -8.857367  | -6.037223  | 1.445013 |
| 396 | 6 | -7.445740  | -7.478764  | 0.000000 |
| 397 | 6 | -6.344559  | -8.433120  | 0.000000 |
| 398 | 8 | -4.717017  | -9.625527  | 1.445013 |
| 399 | 6 | -3.413543  | -10.252895 | 3.464592 |
| 400 | 6 | -3.406060  | -10.230418 | 4.921974 |
| 401 | 8 | -4.650293  | -9.536679  | 6.945770 |
| 402 | 1 | -5.698194  | -8.495929  | 9.291538 |
| 403 | 1 | -7.599780  | -6.847887  | 9.291538 |
| 404 | 6 | -10.390036 | -2.465318  | 4.904698 |
| 405 | 6 | -10.411192 | -2.470794  | 3.491030 |
| 406 | 6 | -10.550376 | -1.464255  | 2.479208 |
| 407 | 6 | -10.651383 | -0.050156  | 2.479208 |
| 408 | 6 | -10.656674 | 0.965946   | 3.491030 |
| 409 | 6 | -10.634954 | 0.963533   | 4.904698 |
| 410 | 6 | -10.587340 | -0.053257  | 5.914781 |
| 411 | 6 | -10.487424 | -1.452083  | 5.914781 |
| 412 | 6 | -10.459067 | 0.621947   | 7.142341 |
| 413 | 6 | -10.491678 | 2.176237   | 5.579734 |
| 414 | 6 | -10.541152 | 2.183774   | 2.814135 |
| 415 | 6 | -10.587768 | 0.626898   | 1.259496 |
| 416 | 6 | -10.391176 | -2.125394  | 1.259496 |
| 417 | 6 | -10.123751 | -3.659838  | 2.814135 |
| 418 | 6 | -10.075850 | -3.645346  | 5.579734 |
| 419 | 6 | -10.264486 | -2.102200  | 7.142341 |
| 420 | 6 | -10.202952 | -1.430570  | 8.368991 |
| 421 | 6 | -10.302699 | -0.034119  | 8.368991 |
| 422 | 8 | -10.420954 | 1.994293   | 6.945770 |
| 423 | 8 | -10.532066 | 1.994143   | 1.445013 |
| 424 | 6 | -10.449398 | -1.476836  | 0.000000 |
| 425 | 8 | -10.141710 | -3.470841  | 1.445013 |
| 426 | 6 | -9.663631  | -4.836152  | 3.464592 |
| 427 | 6 | -9.642446  | -4.825550  | 4.921974 |
| 428 | 8 | -10.031704 | -3.455197  | 6.945770 |
| 429 | 1 | -10.036761 | -1.978297  | 9.291538 |
| 430 | 1 | -10.216044 | 0.531669   | 9.291538 |
| 431 | 6 | -3.645346  | 10.075850  | 5.579734 |
| 432 | 6 | -4.825550  | 9.642446   | 4.921974 |

**Table S9.** The optimized Cartesian coordinates of the 1D ribbons (n=2) calculated at the B3LYP/6–21G(d) level of theory

| Center Number | Atomic Number | Coordinates (Angstroms) |          |           |
|---------------|---------------|-------------------------|----------|-----------|
|               |               | X                       | Y        | Z         |
| 1             | 1             | 0.000000                | 2.943420 | 5.110970  |
| 2             | 1             | 0.000000                | 5.453130 | 5.106563  |
| 3             | 1             | 0.000000                | 9.300066 | 1.254142  |
| 4             | 6             | 0.000000                | 8.365114 | 0.701478  |
| 5             | 6             | 0.000000                | 8.365114 | -0.701478 |
| 6             | 1             | 0.000000                | 9.300066 | -1.254142 |
| 7             | 6             | 0.000000                | 7.136094 | -1.375724 |
| 8             | 6             | 0.000000                | 5.905565 | -0.698734 |
| 9             | 6             | 0.000000                | 5.905565 | 0.698734  |
| 10            | 6             | 0.000000                | 7.136094 | 1.375724  |
| 11            | 8             | 0.000000                | 6.945354 | 2.752101  |
| 12            | 6             | 0.000000                | 5.569448 | 2.941857  |
| 13            | 6             | 0.000000                | 4.898010 | 4.173132  |
| 14            | 6             | 0.000000                | 3.495821 | 4.175937  |
| 15            | 6             | 0.000000                | 2.821806 | 2.947520  |
| 16            | 6             | 0.000000                | 3.492671 | 1.712953  |
| 17            | 6             | 0.000000                | 4.891824 | 1.711528  |
| 18            | 6             | 0.000000                | 4.891824 | -1.711528 |
| 19            | 6             | 0.000000                | 3.492671 | -1.712953 |
| 20            | 6             | 0.000000                | 2.473410 | -0.705499 |
| 21            | 6             | 0.000000                | 2.473410 | 0.705499  |
| 22            | 8             | 0.000000                | 1.444771 | 2.757731  |

|    |   |          |           |           |
|----|---|----------|-----------|-----------|
| 23 | 6 | 0.000000 | 1.258577  | 1.387993  |
| 24 | 6 | 0.000000 | 0.000000  | 0.730893  |
| 25 | 6 | 0.000000 | 1.258577  | -1.387993 |
| 26 | 6 | 0.000000 | 2.821806  | -2.947520 |
| 27 | 8 | 0.000000 | 1.444771  | -2.757731 |
| 28 | 6 | 0.000000 | 5.569448  | -2.941857 |
| 29 | 6 | 0.000000 | 4.898010  | -4.173132 |
| 30 | 6 | 0.000000 | 3.495821  | -4.175937 |
| 31 | 1 | 0.000000 | 2.943420  | -5.110970 |
| 32 | 1 | 0.000000 | 5.453130  | -5.106563 |
| 33 | 8 | 0.000000 | 6.945354  | -2.752101 |
| 34 | 1 | 0.000000 | -5.453130 | 5.106563  |
| 35 | 1 | 0.000000 | -2.943420 | 5.110970  |
| 36 | 6 | 0.000000 | 0.000000  | -0.730893 |
| 37 | 6 | 0.000000 | -1.258577 | -1.387993 |
| 38 | 6 | 0.000000 | -2.473410 | -0.705499 |
| 39 | 6 | 0.000000 | -2.473410 | 0.705499  |
| 40 | 6 | 0.000000 | -1.258577 | 1.387993  |
| 41 | 8 | 0.000000 | -1.444771 | 2.757731  |
| 42 | 6 | 0.000000 | -2.821806 | 2.947520  |
| 43 | 6 | 0.000000 | -3.495821 | 4.175937  |
| 44 | 6 | 0.000000 | -4.898010 | 4.173132  |
| 45 | 6 | 0.000000 | -5.569448 | 2.941857  |
| 46 | 6 | 0.000000 | -4.891824 | 1.711528  |
| 47 | 6 | 0.000000 | -3.492671 | 1.712953  |
| 48 | 6 | 0.000000 | -3.492671 | -1.712953 |
| 49 | 6 | 0.000000 | -4.891824 | -1.711528 |
| 50 | 6 | 0.000000 | -5.905565 | -0.698734 |
| 51 | 6 | 0.000000 | -5.905565 | 0.698734  |
| 52 | 8 | 0.000000 | -6.945354 | 2.752101  |
| 53 | 6 | 0.000000 | -7.136094 | 1.375724  |
| 54 | 6 | 0.000000 | -8.365114 | 0.701478  |
| 55 | 1 | 0.000000 | -9.300066 | 1.254142  |
| 56 | 6 | 0.000000 | -8.365114 | -0.701478 |
| 57 | 6 | 0.000000 | -7.136094 | -1.375724 |
| 58 | 1 | 0.000000 | -9.300066 | -1.254142 |
| 59 | 6 | 0.000000 | -5.569448 | -2.941857 |
| 60 | 8 | 0.000000 | -6.945354 | -2.752101 |
| 61 | 6 | 0.000000 | -2.821806 | -2.947520 |
| 62 | 6 | 0.000000 | -3.495821 | -4.175937 |
| 63 | 6 | 0.000000 | -4.898010 | -4.173132 |
| 64 | 1 | 0.000000 | -5.453130 | -5.106563 |
| 65 | 1 | 0.000000 | -2.943420 | -5.110970 |
| 66 | 8 | 0.000000 | -1.444771 | -2.757731 |

**Table S10.** The optimized Cartesian coordinates of the 1D ribbons (n=3) calculated at the B3LYP/6-21G(d) level of theory

| Center<br>Number | Atomic<br>Number | Coordinates (Angstroms) |           |           |
|------------------|------------------|-------------------------|-----------|-----------|
|                  |                  | X                       | Y         | Z         |
| 1                | 8                | 0.000000                | 2.752144  | 11.139336 |
| 2                | 6                | 0.000000                | -2.947797 | 7.015744  |
| 3                | 6                | 0.000000                | -1.387997 | 5.452151  |
| 4                | 6                | 0.000000                | 1.387997  | 5.452151  |
| 5                | 6                | 0.000000                | 2.947797  | 7.015744  |
| 6                | 6                | 0.000000                | 2.941949  | 9.763420  |
| 7                | 6                | 0.000000                | 1.375737  | 11.330053 |
| 8                | 6                | 0.000000                | -1.713124 | 7.686512  |
| 9                | 6                | 0.000000                | -1.711621 | 9.085658  |
| 10               | 6                | 0.000000                | -0.698734 | 10.099478 |
| 11               | 6                | 0.000000                | 0.698734  | 10.099478 |
| 12               | 6                | 0.000000                | 1.711621  | 9.085658  |
| 13               | 6                | 0.000000                | 1.713124  | 7.686512  |
| 14               | 6                | 0.000000                | 0.705607  | 6.667156  |
| 15               | 6                | 0.000000                | -0.705607 | 6.667156  |
| 16               | 6                | 0.000000                | -2.941949 | 9.763420  |
| 17               | 6                | 0.000000                | -1.375737 | 11.330053 |
| 18               | 6                | 0.000000                | -4.173239 | 9.092171  |
| 19               | 6                | 0.000000                | -4.176128 | 7.689806  |
| 20               | 6                | 0.000000                | 4.173239  | 9.092171  |
| 21               | 6                | 0.000000                | 4.176128  | 7.689806  |
| 22               | 6                | 0.000000                | 0.701547  | 12.559066 |
| 23               | 6                | 0.000000                | -0.701547 | 12.559066 |
| 24               | 8                | 0.000000                | -2.758237 | 5.638797  |

|    |   |          |           |            |
|----|---|----------|-----------|------------|
| 25 | 8 | 0.000000 | -2.752144 | 11.139336  |
| 26 | 8 | 0.000000 | 2.758237  | 5.638797   |
| 27 | 1 | 0.000000 | -5.106631 | 9.647288   |
| 28 | 1 | 0.000000 | -5.111244 | 7.137605   |
| 29 | 1 | 0.000000 | 1.254046  | 13.494080  |
| 30 | 1 | 0.000000 | -1.254046 | 13.494080  |
| 31 | 1 | 0.000000 | 5.106631  | 9.647288   |
| 32 | 1 | 0.000000 | 5.111244  | 7.137605   |
| 33 | 8 | 0.000000 | 2.757346  | 2.747651   |
| 34 | 6 | 0.000000 | -2.946807 | -1.371397  |
| 35 | 6 | 0.000000 | -1.387232 | -2.935257  |
| 36 | 6 | 0.000000 | 1.387232  | -2.935257  |
| 37 | 6 | 0.000000 | 2.946807  | -1.371397  |
| 38 | 6 | 0.000000 | 2.946807  | 1.371397   |
| 39 | 6 | 0.000000 | 1.387232  | 2.935257   |
| 40 | 6 | 0.000000 | -1.711759 | -0.700237  |
| 41 | 6 | 0.000000 | -1.711759 | 0.700237   |
| 42 | 6 | 0.000000 | -0.705272 | 1.719318   |
| 43 | 6 | 0.000000 | 0.705272  | 1.719318   |
| 44 | 6 | 0.000000 | 1.711759  | 0.700237   |
| 45 | 6 | 0.000000 | 1.711759  | -0.700237  |
| 46 | 6 | 0.000000 | 0.705272  | -1.719318  |
| 47 | 6 | 0.000000 | -0.705272 | -1.719318  |
| 48 | 6 | 0.000000 | -2.946807 | 1.371397   |
| 49 | 6 | 0.000000 | -1.387232 | 2.935257   |
| 50 | 6 | 0.000000 | -4.177103 | 0.701021   |
| 51 | 6 | 0.000000 | -4.177103 | -0.701021  |
| 52 | 6 | 0.000000 | 4.177103  | 0.701021   |
| 53 | 6 | 0.000000 | 4.177103  | -0.701021  |
| 54 | 6 | 0.000000 | 0.731208  | 4.193357   |
| 55 | 6 | 0.000000 | -0.731208 | 4.193357   |
| 56 | 8 | 0.000000 | -2.757346 | -2.747651  |
| 57 | 8 | 0.000000 | -2.757346 | 2.747651   |
| 58 | 8 | 0.000000 | 2.757346  | -2.747651  |
| 59 | 1 | 0.000000 | -5.110468 | 1.256053   |
| 60 | 1 | 0.000000 | -5.110468 | -1.256053  |
| 61 | 1 | 0.000000 | 5.110468  | 1.256053   |
| 62 | 1 | 0.000000 | 5.110468  | -1.256053  |
| 63 | 8 | 0.000000 | 2.758237  | -5.638797  |
| 64 | 6 | 0.000000 | -2.941949 | -9.763420  |
| 65 | 6 | 0.000000 | -1.375737 | -11.330053 |
| 66 | 6 | 0.000000 | 1.375737  | -11.330053 |
| 67 | 6 | 0.000000 | 2.941949  | -9.763420  |
| 68 | 6 | 0.000000 | 2.947797  | -7.015744  |
| 69 | 6 | 0.000000 | 1.387997  | -5.452151  |
| 70 | 6 | 0.000000 | -1.711621 | -9.085658  |
| 71 | 6 | 0.000000 | -1.713124 | -7.686512  |
| 72 | 6 | 0.000000 | -0.705607 | -6.667156  |
| 73 | 6 | 0.000000 | 0.705607  | -6.667156  |
| 74 | 6 | 0.000000 | 1.713124  | -7.686512  |
| 75 | 6 | 0.000000 | 1.711621  | -9.085658  |
| 76 | 6 | 0.000000 | 0.698734  | -10.099478 |
| 77 | 6 | 0.000000 | -0.698734 | -10.099478 |
| 78 | 6 | 0.000000 | -2.947797 | -7.015744  |
| 79 | 6 | 0.000000 | -1.387997 | -5.452151  |
| 80 | 6 | 0.000000 | -4.176128 | -7.689806  |
| 81 | 6 | 0.000000 | -4.173239 | -9.092171  |
| 82 | 6 | 0.000000 | 4.176128  | -7.689806  |
| 83 | 6 | 0.000000 | 4.173239  | -9.092171  |
| 84 | 6 | 0.000000 | 0.731208  | -4.193357  |
| 85 | 6 | 0.000000 | -0.731208 | -4.193357  |
| 86 | 6 | 0.000000 | 0.701547  | -12.559066 |
| 87 | 6 | 0.000000 | -0.701547 | -12.559066 |
| 88 | 8 | 0.000000 | -2.752144 | -11.139336 |
| 89 | 8 | 0.000000 | -2.758237 | -5.638797  |
| 90 | 8 | 0.000000 | 2.752144  | -11.139336 |
| 91 | 1 | 0.000000 | -5.111244 | -7.137605  |
| 92 | 1 | 0.000000 | -5.106631 | -9.647288  |
| 93 | 1 | 0.000000 | 5.111244  | -7.137605  |
| 94 | 1 | 0.000000 | 5.106631  | -9.647288  |
| 95 | 1 | 0.000000 | 1.254046  | -13.494080 |
| 96 | 1 | 0.000000 | -1.254046 | -13.494080 |

---

**Table S11.** The optimized Cartesian coordinates of the 1D ribbons (n=4) calculated at the B3LYP/6–21G(d) level of theory

| Center<br>Number | Atomic<br>Number | Coordinates (Angstroms) |            |           |
|------------------|------------------|-------------------------|------------|-----------|
|                  |                  | X                       | Y          | Z         |
| 1                | 6                | 0.000000                | 13.285875  | 4.173345  |
| 2                | 6                | 0.000000                | 11.209592  | 2.947809  |
| 3                | 6                | 0.000000                | 11.883525  | 4.176242  |
| 4                | 6                | 0.000000                | 13.956997  | 2.941968  |
| 5                | 8                | 0.000000                | -15.333026 | 2.752136  |
| 6                | 6                | 0.000000                | -11.209592 | -2.947809 |
| 7                | 6                | 0.000000                | -9.645802  | -1.387941 |
| 8                | 6                | 0.000000                | -9.645802  | 1.387941  |
| 9                | 6                | 0.000000                | -11.209592 | 2.947809  |
| 10               | 6                | 0.000000                | -13.956997 | 2.941968  |
| 11               | 6                | 0.000000                | -15.523789 | 1.375616  |
| 12               | 6                | 0.000000                | -11.880228 | -1.713069 |
| 13               | 6                | 0.000000                | -13.279374 | -1.711570 |
| 14               | 6                | 0.000000                | -14.293161 | -0.698733 |
| 15               | 6                | 0.000000                | -14.293161 | 0.698733  |
| 16               | 6                | 0.000000                | -13.279374 | 1.711570  |
| 17               | 6                | 0.000000                | -11.880228 | 1.713069  |
| 18               | 6                | 0.000000                | -10.860880 | 0.705587  |
| 19               | 6                | 0.000000                | -10.860880 | -0.705587 |
| 20               | 6                | 0.000000                | -13.956997 | -2.941968 |
| 21               | 6                | 0.000000                | -15.523789 | -1.375616 |
| 22               | 6                | 0.000000                | -13.285875 | -4.173345 |
| 23               | 6                | 0.000000                | -11.883525 | -4.176242 |
| 24               | 6                | 0.000000                | -13.285875 | 4.173345  |
| 25               | 6                | 0.000000                | -11.883525 | 4.176242  |
| 26               | 6                | 0.000000                | -16.752884 | 0.701544  |
| 27               | 6                | 0.000000                | -16.752884 | -0.701544 |
| 28               | 8                | 0.000000                | -9.832542  | -2.758220 |
| 29               | 8                | 0.000000                | -15.333026 | -2.752136 |
| 30               | 8                | 0.000000                | -9.832542  | 2.758220  |
| 31               | 1                | 0.000000                | -13.841104 | -5.106685 |
| 32               | 1                | 0.000000                | -11.331215 | -5.111306 |
| 33               | 1                | 0.000000                | -17.687860 | 1.254131  |
| 34               | 1                | 0.000000                | -17.687860 | -1.254131 |
| 35               | 1                | 0.000000                | -13.841104 | 5.106685  |
| 36               | 1                | 0.000000                | -11.331215 | 5.111306  |
| 37               | 8                | 0.000000                | -6.941216  | 2.757418  |
| 38               | 6                | 0.000000                | -2.822196  | -2.946911 |
| 39               | 6                | 0.000000                | -1.258324  | -1.387423 |
| 40               | 6                | 0.000000                | -1.258324  | 1.387423  |
| 41               | 6                | 0.000000                | -2.822196  | 2.946911  |
| 42               | 6                | 0.000000                | -5.564951  | 2.946800  |
| 43               | 6                | 0.000000                | -7.128878  | 1.387268  |
| 44               | 6                | 0.000000                | -3.493230  | -1.711796 |
| 45               | 6                | 0.000000                | -4.893825  | -1.711742 |
| 46               | 6                | 0.000000                | -5.912886  | -0.705310 |
| 47               | 6                | 0.000000                | -5.912886  | 0.705310  |
| 48               | 6                | 0.000000                | -4.893825  | 1.711742  |
| 49               | 6                | 0.000000                | -3.493230  | 1.711796  |
| 50               | 6                | 0.000000                | -2.474097  | 0.705430  |
| 51               | 6                | 0.000000                | -2.474097  | -0.705430 |
| 52               | 6                | 0.000000                | -5.564951  | -2.946800 |
| 53               | 6                | 0.000000                | -7.128878  | -1.387268 |
| 54               | 6                | 0.000000                | -4.894589  | -4.177180 |
| 55               | 6                | 0.000000                | -3.492585  | -4.177245 |
| 56               | 6                | 0.000000                | -4.894589  | 4.177180  |
| 57               | 6                | 0.000000                | -3.492585  | 4.177245  |
| 58               | 6                | 0.000000                | -8.387004  | 0.731285  |
| 59               | 6                | 0.000000                | -8.387004  | -0.731285 |
| 60               | 8                | 0.000000                | -1.445853  | -2.757512 |
| 61               | 8                | 0.000000                | -6.941216  | -2.757418 |
| 62               | 8                | 0.000000                | -1.445853  | 2.757512  |
| 63               | 1                | 0.000000                | -5.449727  | -5.110475 |
| 64               | 1                | 0.000000                | -2.937550  | -5.110594 |
| 65               | 1                | 0.000000                | -5.449727  | 5.110475  |
| 66               | 1                | 0.000000                | -2.937550  | 5.110594  |
| 67               | 8                | 0.000000                | 1.445853   | 2.757512  |
| 68               | 6                | 0.000000                | 5.564951   | -2.946800 |
| 69               | 6                | 0.000000                | 7.128878   | -1.387268 |
| 70               | 6                | 0.000000                | 7.128878   | 1.387268  |
| 71               | 6                | 0.000000                | 5.564951   | 2.946800  |
| 72               | 6                | 0.000000                | 2.822196   | 2.946911  |

|     |   |          |           |           |
|-----|---|----------|-----------|-----------|
| 73  | 6 | 0.000000 | 1.258324  | 1.387423  |
| 74  | 6 | 0.000000 | 4.893825  | -1.711742 |
| 75  | 6 | 0.000000 | 3.493230  | -1.711796 |
| 76  | 6 | 0.000000 | 2.474097  | -0.705430 |
| 77  | 6 | 0.000000 | 2.474097  | 0.705430  |
| 78  | 6 | 0.000000 | 3.493230  | 1.711796  |
| 79  | 6 | 0.000000 | 4.893825  | 1.711742  |
| 80  | 6 | 0.000000 | 5.912886  | 0.705310  |
| 81  | 6 | 0.000000 | 5.912886  | -0.705310 |
| 82  | 6 | 0.000000 | 2.822196  | -2.946911 |
| 83  | 6 | 0.000000 | 1.258324  | -1.387423 |
| 84  | 6 | 0.000000 | 3.492585  | -4.177245 |
| 85  | 6 | 0.000000 | 4.894589  | -4.177180 |
| 86  | 6 | 0.000000 | 3.492585  | 4.177245  |
| 87  | 6 | 0.000000 | 4.894589  | 4.177180  |
| 88  | 6 | 0.000000 | 0.000000  | 0.731396  |
| 89  | 6 | 0.000000 | 0.000000  | -0.731396 |
| 90  | 6 | 0.000000 | 8.387004  | -0.731285 |
| 91  | 8 | 0.000000 | 6.941216  | -2.757418 |
| 92  | 8 | 0.000000 | 1.445853  | -2.757512 |
| 93  | 8 | 0.000000 | 6.941216  | 2.757418  |
| 94  | 1 | 0.000000 | 2.937550  | -5.110594 |
| 95  | 1 | 0.000000 | 5.449727  | -5.110475 |
| 96  | 1 | 0.000000 | 2.937550  | 5.110594  |
| 97  | 1 | 0.000000 | 5.449727  | 5.110475  |
| 98  | 6 | 0.000000 | 8.387004  | 0.731285  |
| 99  | 6 | 0.000000 | 9.645802  | -1.387941 |
| 100 | 6 | 0.000000 | 9.645802  | 1.387941  |
| 101 | 6 | 0.000000 | 10.860880 | 0.705587  |
| 102 | 6 | 0.000000 | 10.860880 | -0.705587 |
| 103 | 6 | 0.000000 | 11.880228 | 1.713069  |
| 104 | 6 | 0.000000 | 13.279374 | 1.711570  |
| 105 | 6 | 0.000000 | 14.293161 | 0.698733  |
| 106 | 6 | 0.000000 | 14.293161 | -0.698733 |
| 107 | 6 | 0.000000 | 13.279374 | -1.711570 |
| 108 | 6 | 0.000000 | 11.880228 | -1.713069 |
| 109 | 6 | 0.000000 | 15.523789 | 1.375616  |
| 110 | 6 | 0.000000 | 16.752884 | 0.701544  |
| 111 | 6 | 0.000000 | 16.752884 | -0.701544 |
| 112 | 6 | 0.000000 | 15.523789 | -1.375616 |
| 113 | 6 | 0.000000 | 11.209592 | -2.947809 |
| 114 | 6 | 0.000000 | 11.883525 | -4.176242 |
| 115 | 6 | 0.000000 | 13.285875 | -4.173345 |
| 116 | 6 | 0.000000 | 13.956997 | -2.941968 |
| 117 | 8 | 0.000000 | 9.832542  | -2.758220 |
| 118 | 8 | 0.000000 | 15.333026 | -2.752136 |
| 119 | 8 | 0.000000 | 15.333026 | 2.752136  |
| 120 | 8 | 0.000000 | 9.832542  | 2.758220  |
| 121 | 1 | 0.000000 | 13.841104 | 5.106685  |
| 122 | 1 | 0.000000 | 11.331215 | 5.111306  |
| 123 | 1 | 0.000000 | 17.687860 | 1.254131  |
| 124 | 1 | 0.000000 | 17.687860 | -1.254131 |
| 125 | 1 | 0.000000 | 11.331215 | -5.111306 |
| 126 | 1 | 0.000000 | 13.841104 | -5.106685 |

**Table S12.** The optimized Cartesian coordinates of the 1D ribbons (n=9) calculated at the B3LYP/6-21G(d) level of theory

| Center Number | Atomic Number | Coordinates (Angstroms) |           |           |
|---------------|---------------|-------------------------|-----------|-----------|
|               |               | X                       | Y         | Z         |
| 1             | 6             | 0.000000                | 4.177058  | 7.685522  |
| 2             | 6             | 0.000000                | 2.946713  | 9.757744  |
| 3             | 6             | 0.000000                | 4.177054  | 9.087462  |
| 4             | 6             | 0.000000                | 2.946711  | 7.015236  |
| 5             | 8             | 0.000000                | 2.752039  | 36.298291 |
| 6             | 6             | 0.000000                | -2.947622 | 32.174981 |
| 7             | 6             | 0.000000                | -1.387957 | 30.611274 |
| 8             | 6             | 0.000000                | 1.387957  | 30.611274 |
| 9             | 6             | 0.000000                | 2.947622  | 32.174981 |
| 10            | 6             | 0.000000                | 2.941845  | 34.922371 |
| 11            | 6             | 0.000000                | 1.375656  | 36.489046 |
| 12            | 6             | 0.000000                | -1.712937 | 32.845510 |



|    |   |          |           |           |
|----|---|----------|-----------|-----------|
| 13 | 6 | 0.000000 | -1.711492 | 34.244710 |
| 14 | 6 | 0.000000 | -0.698760 | 35.258483 |
| 15 | 6 | 0.000000 | 0.698760  | 35.258483 |
| 16 | 6 | 0.000000 | 1.711492  | 34.244710 |
| 17 | 6 | 0.000000 | 1.712937  | 32.845510 |
| 18 | 6 | 0.000000 | 0.705487  | 31.826315 |
| 19 | 6 | 0.000000 | -0.705487 | 31.826315 |
| 20 | 6 | 0.000000 | -2.941845 | 34.922371 |
| 21 | 6 | 0.000000 | -1.375656 | 36.489046 |
| 22 | 6 | 0.000000 | -4.173204 | 34.251101 |
| 23 | 6 | 0.000000 | -4.176034 | 32.848805 |
| 24 | 6 | 0.000000 | 4.173204  | 34.251101 |
| 25 | 6 | 0.000000 | 4.176034  | 32.848805 |
| 26 | 6 | 0.000000 | 0.701466  | 37.718098 |
| 27 | 6 | 0.000000 | -0.701466 | 37.718098 |
| 28 | 8 | 0.000000 | -2.757754 | 30.797776 |
| 29 | 8 | 0.000000 | -2.752039 | 36.298291 |
| 30 | 8 | 0.000000 | 2.757754  | 30.797776 |
| 31 | 1 | 0.000000 | -5.106535 | 34.806427 |
| 32 | 1 | 0.000000 | -5.111046 | 32.296397 |
| 33 | 1 | 0.000000 | 1.254119  | 38.653034 |
| 34 | 1 | 0.000000 | -1.254119 | 38.653034 |
| 35 | 1 | 0.000000 | 5.106535  | 34.806427 |
| 36 | 1 | 0.000000 | 5.111046  | 32.296397 |
| 37 | 8 | 0.000000 | 2.757012  | 27.907352 |
| 38 | 6 | 0.000000 | -2.946720 | 23.788366 |
| 39 | 6 | 0.000000 | -1.387471 | 22.224481 |
| 40 | 6 | 0.000000 | 1.387471  | 22.224481 |
| 41 | 6 | 0.000000 | 2.946720  | 23.788366 |
| 42 | 6 | 0.000000 | 2.946578  | 26.530932 |
| 43 | 6 | 0.000000 | 1.387291  | 28.094844 |
| 44 | 6 | 0.000000 | -1.711628 | 24.459251 |
| 45 | 6 | 0.000000 | -1.711564 | 25.859899 |
| 46 | 6 | 0.000000 | -0.705212 | 26.878881 |
| 47 | 6 | 0.000000 | 0.705212  | 26.878881 |
| 48 | 6 | 0.000000 | 1.711564  | 25.859899 |
| 49 | 6 | 0.000000 | 1.711628  | 24.459251 |
| 50 | 6 | 0.000000 | 0.705333  | 23.440210 |
| 51 | 6 | 0.000000 | -0.705333 | 23.440210 |
| 52 | 6 | 0.000000 | -2.946578 | 26.530932 |
| 53 | 6 | 0.000000 | -1.387291 | 28.094844 |
| 54 | 6 | 0.000000 | -4.176944 | 25.860646 |
| 55 | 6 | 0.000000 | -4.177042 | 24.458691 |
| 56 | 6 | 0.000000 | 4.176944  | 25.860646 |
| 57 | 6 | 0.000000 | 4.177042  | 24.458691 |
| 58 | 6 | 0.000000 | 0.731186  | 29.352763 |
| 59 | 6 | 0.000000 | -0.731186 | 29.352763 |
| 60 | 8 | 0.000000 | -2.757158 | 22.411843 |
| 61 | 8 | 0.000000 | -2.757012 | 27.907352 |
| 62 | 8 | 0.000000 | 2.757158  | 22.411843 |
| 63 | 1 | 0.000000 | -5.110131 | 26.415985 |
| 64 | 1 | 0.000000 | -5.110314 | 23.903484 |
| 65 | 1 | 0.000000 | 5.110131  | 26.415985 |
| 66 | 1 | 0.000000 | 5.110314  | 23.903484 |
| 67 | 8 | 0.000000 | 2.757125  | 19.520712 |
| 68 | 6 | 0.000000 | -2.946715 | 15.401779 |
| 69 | 6 | 0.000000 | -1.387456 | 13.837936 |
| 70 | 6 | 0.000000 | 1.387456  | 13.837936 |
| 71 | 6 | 0.000000 | 2.946715  | 15.401779 |
| 72 | 6 | 0.000000 | 2.946710  | 18.144301 |
| 73 | 6 | 0.000000 | 1.387439  | 19.708135 |
| 74 | 6 | 0.000000 | -1.711632 | 16.072714 |
| 75 | 6 | 0.000000 | -1.711619 | 17.473373 |
| 76 | 6 | 0.000000 | -0.705337 | 18.492390 |
| 77 | 6 | 0.000000 | 0.705337  | 18.492390 |
| 78 | 6 | 0.000000 | 1.711619  | 17.473373 |
| 79 | 6 | 0.000000 | 1.711632  | 16.072714 |
| 80 | 6 | 0.000000 | 0.705334  | 15.053693 |
| 81 | 6 | 0.000000 | -0.705334 | 15.053693 |
| 82 | 6 | 0.000000 | -2.946710 | 18.144301 |
| 83 | 6 | 0.000000 | -1.387439 | 19.708135 |
| 84 | 6 | 0.000000 | -4.177068 | 17.474021 |
| 85 | 6 | 0.000000 | -4.177083 | 16.072037 |
| 86 | 6 | 0.000000 | 4.177068  | 17.474021 |
| 87 | 6 | 0.000000 | 4.177083  | 16.072037 |
| 88 | 6 | 0.000000 | 0.731320  | 20.966340 |
| 89 | 6 | 0.000000 | -0.731320 | 20.966340 |
| 90 | 6 | 0.000000 | -0.731323 | 12.579768 |
| 91 | 8 | 0.000000 | -2.757122 | 14.025334 |

|     |   |          |           |            |
|-----|---|----------|-----------|------------|
| 92  | 8 | 0.000000 | -2.757125 | 19.520712  |
| 93  | 8 | 0.000000 | 2.757122  | 14.025334  |
| 94  | 1 | 0.000000 | -5.110330 | 18.029278  |
| 95  | 1 | 0.000000 | -5.110350 | 15.516793  |
| 96  | 1 | 0.000000 | 5.110330  | 18.029278  |
| 97  | 1 | 0.000000 | 5.110350  | 15.516793  |
| 98  | 6 | 0.000000 | 0.731323  | 12.579768  |
| 99  | 6 | 0.000000 | -1.387458 | 11.321591  |
| 100 | 6 | 0.000000 | 1.387458  | 11.321591  |
| 101 | 6 | 0.000000 | 0.705338  | 10.105858  |
| 102 | 6 | 0.000000 | -0.705338 | 10.105858  |
| 103 | 6 | 0.000000 | 1.711617  | 9.086844   |
| 104 | 6 | 0.000000 | 1.711628  | 7.686185   |
| 105 | 6 | 0.000000 | 0.705346  | 6.667163   |
| 106 | 6 | 0.000000 | -0.705346 | 6.667163   |
| 107 | 6 | 0.000000 | -1.711628 | 7.686185   |
| 108 | 6 | 0.000000 | -1.711617 | 9.086844   |
| 109 | 6 | 0.000000 | 1.387464  | 5.451425   |
| 110 | 6 | 0.000000 | -0.731303 | 4.193264   |
| 111 | 6 | 0.000000 | -1.387464 | 5.451425   |
| 112 | 6 | 0.000000 | -2.946713 | 9.757744   |
| 113 | 6 | 0.000000 | -4.177054 | 9.087462   |
| 114 | 6 | 0.000000 | -4.177058 | 7.685522   |
| 115 | 6 | 0.000000 | -2.946711 | 7.015236   |
| 116 | 8 | 0.000000 | -2.757140 | 11.134199  |
| 117 | 8 | 0.000000 | -2.757140 | 5.638821   |
| 118 | 8 | 0.000000 | 2.757140  | 5.638821   |
| 119 | 8 | 0.000000 | 2.757140  | 11.134199  |
| 120 | 1 | 0.000000 | 5.110301  | 7.130273   |
| 121 | 1 | 0.000000 | 5.110295  | 9.642720   |
| 122 | 1 | 0.000000 | -5.110295 | 9.642720   |
| 123 | 1 | 0.000000 | -5.110301 | 7.130273   |
| 124 | 8 | 0.000000 | 2.757128  | 2.747687   |
| 125 | 6 | 0.000000 | -2.946719 | -1.371284  |
| 126 | 6 | 0.000000 | -1.387464 | -2.935097  |
| 127 | 6 | 0.000000 | 1.387464  | -2.935097  |
| 128 | 6 | 0.000000 | 2.946719  | -1.371284  |
| 129 | 6 | 0.000000 | 2.946719  | 1.371284   |
| 130 | 6 | 0.000000 | 1.387464  | 2.935097   |
| 131 | 6 | 0.000000 | -1.711633 | -0.700334  |
| 132 | 6 | 0.000000 | -1.711633 | 0.700334   |
| 133 | 6 | 0.000000 | -0.705344 | 1.719360   |
| 134 | 6 | 0.000000 | 0.705344  | 1.719360   |
| 135 | 6 | 0.000000 | 1.711633  | 0.700334   |
| 136 | 6 | 0.000000 | 1.711633  | -0.700334  |
| 137 | 6 | 0.000000 | 0.705344  | -1.719360  |
| 138 | 6 | 0.000000 | -0.705344 | -1.719360  |
| 139 | 6 | 0.000000 | -2.946719 | 1.371284   |
| 140 | 6 | 0.000000 | -1.387464 | 2.935097   |
| 141 | 6 | 0.000000 | -4.177064 | 0.700982   |
| 142 | 6 | 0.000000 | -4.177064 | -0.700982  |
| 143 | 6 | 0.000000 | 4.177064  | 0.700982   |
| 144 | 6 | 0.000000 | 4.177064  | -0.700982  |
| 145 | 6 | 0.000000 | 0.731303  | 4.193264   |
| 146 | 8 | 0.000000 | -2.757128 | -2.747687  |
| 147 | 8 | 0.000000 | -2.757128 | 2.747687   |
| 148 | 8 | 0.000000 | 2.757128  | -2.747687  |
| 149 | 1 | 0.000000 | -5.110316 | 1.256227   |
| 150 | 1 | 0.000000 | -5.110316 | -1.256227  |
| 151 | 1 | 0.000000 | 5.110316  | 1.256227   |
| 152 | 1 | 0.000000 | 5.110316  | -1.256227  |
| 153 | 8 | 0.000000 | 2.757140  | -5.638821  |
| 154 | 6 | 0.000000 | -2.946713 | -9.757744  |
| 155 | 6 | 0.000000 | -1.387458 | -11.321591 |
| 156 | 6 | 0.000000 | 1.387458  | -11.321591 |
| 157 | 6 | 0.000000 | 2.946713  | -9.757744  |
| 158 | 6 | 0.000000 | 2.946711  | -7.015236  |
| 159 | 6 | 0.000000 | 1.387464  | -5.451425  |
| 160 | 6 | 0.000000 | -1.711617 | -9.086844  |
| 161 | 6 | 0.000000 | -1.711628 | -7.686185  |
| 162 | 6 | 0.000000 | -0.705346 | -6.667163  |
| 163 | 6 | 0.000000 | 0.705346  | -6.667163  |
| 164 | 6 | 0.000000 | 1.711628  | -7.686185  |
| 165 | 6 | 0.000000 | 1.711617  | -9.086844  |
| 166 | 6 | 0.000000 | 0.705338  | -10.105858 |
| 167 | 6 | 0.000000 | -0.705338 | -10.105858 |
| 168 | 6 | 0.000000 | -2.946711 | -7.015236  |
| 169 | 6 | 0.000000 | -1.387464 | -5.451425  |
| 170 | 6 | 0.000000 | -4.177058 | -7.685522  |

|     |   |          |           |            |
|-----|---|----------|-----------|------------|
| 171 | 6 | 0.000000 | -4.177054 | -9.087462  |
| 172 | 6 | 0.000000 | 4.177058  | -7.685522  |
| 173 | 6 | 0.000000 | 4.177054  | -9.087462  |
| 174 | 6 | 0.000000 | 0.731303  | -4.193264  |
| 175 | 6 | 0.000000 | -0.731303 | -4.193264  |
| 176 | 8 | 0.000000 | -2.757140 | -11.134199 |
| 177 | 8 | 0.000000 | -2.757140 | -5.638821  |
| 178 | 8 | 0.000000 | 2.757140  | -11.134199 |
| 179 | 1 | 0.000000 | -5.110301 | -7.130273  |
| 180 | 1 | 0.000000 | -5.110295 | -9.642720  |
| 181 | 1 | 0.000000 | 5.110301  | -7.130273  |
| 182 | 1 | 0.000000 | 5.110295  | -9.642720  |
| 183 | 8 | 0.000000 | 2.757122  | -14.025334 |
| 184 | 6 | 0.000000 | -2.946710 | -18.144301 |
| 185 | 6 | 0.000000 | -1.387439 | -19.708135 |
| 186 | 6 | 0.000000 | 1.387439  | -19.708135 |
| 187 | 6 | 0.000000 | 2.946710  | -18.144301 |
| 188 | 6 | 0.000000 | 2.946715  | -15.401779 |
| 189 | 6 | 0.000000 | 1.387456  | -13.837936 |
| 190 | 6 | 0.000000 | -1.711619 | -17.473373 |
| 191 | 6 | 0.000000 | -1.711632 | -16.072714 |
| 192 | 6 | 0.000000 | -0.705334 | -15.053693 |
| 193 | 6 | 0.000000 | 0.705334  | -15.053693 |
| 194 | 6 | 0.000000 | 1.711632  | -16.072714 |
| 195 | 6 | 0.000000 | 1.711619  | -17.473373 |
| 196 | 6 | 0.000000 | 0.705337  | -18.492390 |
| 197 | 6 | 0.000000 | -0.705337 | -18.492390 |
| 198 | 6 | 0.000000 | -2.946715 | -15.401779 |
| 199 | 6 | 0.000000 | -1.387456 | -13.837936 |
| 200 | 6 | 0.000000 | -4.177083 | -16.072037 |
| 201 | 6 | 0.000000 | -4.177068 | -17.474021 |
| 202 | 6 | 0.000000 | 4.177083  | -16.072037 |
| 203 | 6 | 0.000000 | 4.177068  | -17.474021 |
| 204 | 6 | 0.000000 | 0.731323  | -12.579768 |
| 205 | 6 | 0.000000 | -0.731323 | -12.579768 |
| 206 | 6 | 0.000000 | -0.731320 | -20.966340 |
| 207 | 8 | 0.000000 | -2.757125 | -19.520712 |
| 208 | 8 | 0.000000 | -2.757122 | -14.025334 |
| 209 | 8 | 0.000000 | 2.757125  | -19.520712 |
| 210 | 1 | 0.000000 | -5.110350 | -15.516793 |
| 211 | 1 | 0.000000 | -5.110330 | -18.029278 |
| 212 | 1 | 0.000000 | 5.110350  | -15.516793 |
| 213 | 1 | 0.000000 | 5.110330  | -18.029278 |
| 214 | 6 | 0.000000 | 0.731320  | -20.966340 |
| 215 | 6 | 0.000000 | 4.176944  | -25.860646 |
| 216 | 6 | 0.000000 | 2.946720  | -23.788366 |
| 217 | 6 | 0.000000 | 4.177042  | -24.458691 |
| 218 | 6 | 0.000000 | 2.946578  | -26.530932 |
| 219 | 6 | 0.000000 | -1.387471 | -22.224481 |
| 220 | 6 | 0.000000 | 1.387471  | -22.224481 |
| 221 | 6 | 0.000000 | 0.705333  | -23.440210 |
| 222 | 6 | 0.000000 | -0.705333 | -23.440210 |
| 223 | 6 | 0.000000 | 1.711628  | -24.459251 |
| 224 | 6 | 0.000000 | 1.711564  | -25.859899 |
| 225 | 6 | 0.000000 | 0.705212  | -26.878881 |
| 226 | 6 | 0.000000 | -0.705212 | -26.878881 |
| 227 | 6 | 0.000000 | -1.711564 | -25.859899 |
| 228 | 6 | 0.000000 | -1.711628 | -24.459251 |
| 229 | 6 | 0.000000 | 1.387291  | -28.094844 |
| 230 | 6 | 0.000000 | 0.731186  | -29.352763 |
| 231 | 6 | 0.000000 | -0.731186 | -29.352763 |
| 232 | 6 | 0.000000 | -1.387291 | -28.094844 |
| 233 | 6 | 0.000000 | -2.946720 | -23.788366 |
| 234 | 6 | 0.000000 | -4.177042 | -24.458691 |
| 235 | 6 | 0.000000 | -4.176944 | -25.860646 |
| 236 | 6 | 0.000000 | -2.946578 | -26.530932 |
| 237 | 8 | 0.000000 | -2.757158 | -22.411843 |
| 238 | 8 | 0.000000 | -2.757012 | -27.907352 |
| 239 | 8 | 0.000000 | 2.757012  | -27.907352 |
| 240 | 8 | 0.000000 | 2.757158  | -22.411843 |
| 241 | 1 | 0.000000 | 5.110131  | -26.415985 |
| 242 | 1 | 0.000000 | 5.110314  | -23.903484 |
| 243 | 1 | 0.000000 | -5.110314 | -23.903484 |
| 244 | 1 | 0.000000 | -5.110131 | -26.415985 |
| 245 | 6 | 0.000000 | 4.173204  | -34.251101 |
| 246 | 6 | 0.000000 | 2.947622  | -32.174981 |
| 247 | 6 | 0.000000 | 4.176034  | -32.848805 |
| 248 | 6 | 0.000000 | 2.941845  | -34.922371 |
| 249 | 6 | 0.000000 | -1.387957 | -30.611274 |

|     |   |          |           |            |
|-----|---|----------|-----------|------------|
| 250 | 6 | 0.000000 | 1.387957  | -30.611274 |
| 251 | 6 | 0.000000 | 0.705487  | -31.826315 |
| 252 | 6 | 0.000000 | -0.705487 | -31.826315 |
| 253 | 6 | 0.000000 | 1.712937  | -32.845510 |
| 254 | 6 | 0.000000 | 1.711492  | -34.244710 |
| 255 | 6 | 0.000000 | 0.698760  | -35.258483 |
| 256 | 6 | 0.000000 | -0.698760 | -35.258483 |
| 257 | 6 | 0.000000 | -1.711492 | -34.244710 |
| 258 | 6 | 0.000000 | -1.712937 | -32.845510 |
| 259 | 6 | 0.000000 | 1.375656  | -36.489046 |
| 260 | 6 | 0.000000 | 0.701466  | -37.718098 |
| 261 | 6 | 0.000000 | -0.701466 | -37.718098 |
| 262 | 6 | 0.000000 | -1.375656 | -36.489046 |
| 263 | 6 | 0.000000 | -2.947622 | -32.174981 |
| 264 | 6 | 0.000000 | -4.176034 | -32.848805 |
| 265 | 6 | 0.000000 | -4.173204 | -34.251101 |
| 266 | 6 | 0.000000 | -2.941845 | -34.922371 |
| 267 | 8 | 0.000000 | -2.757754 | -30.797776 |
| 268 | 8 | 0.000000 | -2.752039 | -36.298291 |
| 269 | 8 | 0.000000 | 2.752039  | -36.298291 |
| 270 | 8 | 0.000000 | 2.757754  | -30.797776 |
| 271 | 1 | 0.000000 | 5.106535  | -34.806427 |
| 272 | 1 | 0.000000 | 5.111046  | -32.296397 |
| 273 | 1 | 0.000000 | 1.254119  | -38.653034 |
| 274 | 1 | 0.000000 | -1.254119 | -38.653034 |
| 275 | 1 | 0.000000 | -5.111046 | -32.296397 |
| 276 | 1 | 0.000000 | -5.106535 | -34.806427 |

**Table S13.** The optimized Cartesian coordinates of the 1D ribbons (n=16) calculated at the B3LYP/6–21G(d) level of theory

| Center Number | Atomic Number | Coordinates (Angstroms) |            |           |
|---------------|---------------|-------------------------|------------|-----------|
|               |               | X                       | Y          | Z         |
| 1             | 6             | 0.000000                | -37.038658 | 4.177036  |
| 2             | 6             | 0.000000                | -39.110899 | 2.946681  |
| 3             | 6             | 0.000000                | -38.440614 | 4.177013  |
| 4             | 6             | 0.000000                | -36.368344 | 2.946693  |
| 5             | 8             | 0.000000                | -65.651764 | 2.752082  |
| 6             | 6             | 0.000000                | -61.528397 | -2.947665 |
| 7             | 6             | 0.000000                | -59.964739 | -1.388139 |
| 8             | 6             | 0.000000                | -59.964739 | 1.388139  |
| 9             | 6             | 0.000000                | -61.528397 | 2.947665  |
| 10            | 6             | 0.000000                | -64.275910 | 2.941869  |
| 11            | 6             | 0.000000                | -65.842517 | 1.375731  |
| 12            | 6             | 0.000000                | -62.199015 | -1.713002 |
| 13            | 6             | 0.000000                | -63.598225 | -1.711535 |
| 14            | 6             | 0.000000                | -64.611986 | -0.698756 |
| 15            | 6             | 0.000000                | -64.611986 | 0.698756  |
| 16            | 6             | 0.000000                | -63.598225 | 1.711535  |
| 17            | 6             | 0.000000                | -62.199015 | 1.713002  |
| 18            | 6             | 0.000000                | -61.179778 | 0.705533  |
| 19            | 6             | 0.000000                | -61.179778 | -0.705533 |
| 20            | 6             | 0.000000                | -64.275910 | -2.941869 |
| 21            | 6             | 0.000000                | -65.842517 | -1.375731 |
| 22            | 6             | 0.000000                | -63.604631 | -4.173187 |
| 23            | 6             | 0.000000                | -62.202359 | -4.176049 |
| 24            | 6             | 0.000000                | -63.604631 | 4.173187  |
| 25            | 6             | 0.000000                | -62.202359 | 4.176049  |
| 26            | 6             | 0.000000                | -67.071569 | 0.701491  |
| 27            | 6             | 0.000000                | -67.071569 | -0.701491 |
| 28            | 8             | 0.000000                | -60.151244 | -2.758022 |
| 29            | 8             | 0.000000                | -65.651764 | -2.752082 |
| 30            | 8             | 0.000000                | -60.151244 | 2.758022  |
| 31            | 1             | 0.000000                | -64.159877 | -5.106527 |
| 32            | 1             | 0.000000                | -61.649963 | -5.111073 |
| 33            | 1             | 0.000000                | -68.006558 | 1.254083  |
| 34            | 1             | 0.000000                | -68.006558 | -1.254083 |
| 35            | 1             | 0.000000                | -64.159877 | 5.106527  |
| 36            | 1             | 0.000000                | -61.649963 | 5.111073  |
| 37            | 8             | 0.000000                | -57.260514 | 2.757111  |
| 38            | 6             | 0.000000                | -53.141576 | -2.946698 |
| 39            | 6             | 0.000000                | -51.577741 | -1.387541 |
| 40            | 6             | 0.000000                | -51.577741 | 1.387541  |
| 41            | 6             | 0.000000                | -53.141576 | 2.946698  |

|     |   |          |            |           |
|-----|---|----------|------------|-----------|
| 42  | 6 | 0.000000 | -55.884189 | 2.946580  |
| 43  | 6 | 0.000000 | -57.448044 | 1.387368  |
| 44  | 6 | 0.000000 | -53.812523 | -1.711627 |
| 45  | 6 | 0.000000 | -55.213140 | -1.711563 |
| 46  | 6 | 0.000000 | -56.232106 | -0.705210 |
| 47  | 6 | 0.000000 | -56.232106 | 0.705210  |
| 48  | 6 | 0.000000 | -55.213140 | 1.711563  |
| 49  | 6 | 0.000000 | -53.812523 | 1.711627  |
| 50  | 6 | 0.000000 | -52.793476 | 0.705325  |
| 51  | 6 | 0.000000 | -52.793476 | -0.705325 |
| 52  | 6 | 0.000000 | -55.884189 | -2.946580 |
| 53  | 6 | 0.000000 | -57.448044 | -1.387368 |
| 54  | 6 | 0.000000 | -55.213871 | -4.176922 |
| 55  | 6 | 0.000000 | -53.811912 | -4.177007 |
| 56  | 6 | 0.000000 | -55.213871 | 4.176922  |
| 57  | 6 | 0.000000 | -53.811912 | 4.177007  |
| 58  | 6 | 0.000000 | -58.706083 | 0.731264  |
| 59  | 6 | 0.000000 | -58.706083 | -0.731264 |
| 60  | 8 | 0.000000 | -51.765123 | -2.757197 |
| 61  | 8 | 0.000000 | -57.260514 | -2.757111 |
| 62  | 8 | 0.000000 | -51.765123 | 2.757197  |
| 63  | 1 | 0.000000 | -55.769115 | -5.110159 |
| 64  | 1 | 0.000000 | -53.256776 | -5.110306 |
| 65  | 1 | 0.000000 | -55.769115 | 5.110159  |
| 66  | 1 | 0.000000 | -53.256776 | 5.110306  |
| 67  | 8 | 0.000000 | -48.873956 | 2.757317  |
| 68  | 6 | 0.000000 | -44.754891 | -2.946785 |
| 69  | 6 | 0.000000 | -43.191137 | -1.387643 |
| 70  | 6 | 0.000000 | -43.191137 | 1.387643  |
| 71  | 6 | 0.000000 | -44.754891 | 2.946785  |
| 72  | 6 | 0.000000 | -47.497569 | 2.946780  |
| 73  | 6 | 0.000000 | -49.061309 | 1.387625  |
| 74  | 6 | 0.000000 | -45.425889 | -1.711718 |
| 75  | 6 | 0.000000 | -46.826577 | -1.711704 |
| 76  | 6 | 0.000000 | -47.845591 | -0.705382 |
| 77  | 6 | 0.000000 | -47.845591 | 0.705382  |
| 78  | 6 | 0.000000 | -46.826577 | 1.711704  |
| 79  | 6 | 0.000000 | -45.425889 | 1.711718  |
| 80  | 6 | 0.000000 | -44.406873 | 0.705376  |
| 81  | 6 | 0.000000 | -44.406873 | -0.705376 |
| 82  | 6 | 0.000000 | -47.497569 | -2.946780 |
| 83  | 6 | 0.000000 | -49.061309 | -1.387625 |
| 84  | 6 | 0.000000 | -46.827197 | -4.177076 |
| 85  | 6 | 0.000000 | -45.425242 | -4.177092 |
| 86  | 6 | 0.000000 | -46.827197 | 4.177076  |
| 87  | 6 | 0.000000 | -45.425242 | 4.177092  |
| 88  | 6 | 0.000000 | -50.319530 | 0.731387  |
| 89  | 6 | 0.000000 | -50.319530 | -0.731387 |
| 90  | 6 | 0.000000 | -41.932966 | -0.731390 |
| 91  | 8 | 0.000000 | -43.378464 | -2.757320 |
| 92  | 8 | 0.000000 | -48.873956 | -2.757317 |
| 93  | 8 | 0.000000 | -43.378464 | 2.757320  |
| 94  | 1 | 0.000000 | -47.382376 | -5.110347 |
| 95  | 1 | 0.000000 | -44.870074 | -5.110368 |
| 96  | 1 | 0.000000 | -47.382376 | 5.110347  |
| 97  | 1 | 0.000000 | -44.870074 | 5.110368  |
| 98  | 6 | 0.000000 | -41.932966 | 0.731390  |
| 99  | 6 | 0.000000 | -40.674708 | -1.387505 |
| 100 | 6 | 0.000000 | -40.674708 | 1.387505  |
| 101 | 6 | 0.000000 | -39.458972 | 0.705325  |
| 102 | 6 | 0.000000 | -39.458972 | -0.705325 |
| 103 | 6 | 0.000000 | -38.439947 | 1.711606  |
| 104 | 6 | 0.000000 | -37.039330 | 1.711613  |
| 105 | 6 | 0.000000 | -36.020313 | 0.705330  |
| 106 | 6 | 0.000000 | -36.020313 | -0.705330 |
| 107 | 6 | 0.000000 | -37.039330 | -1.711613 |
| 108 | 6 | 0.000000 | -38.439947 | -1.711606 |
| 109 | 6 | 0.000000 | -34.804578 | 1.387501  |
| 110 | 6 | 0.000000 | -33.546352 | -0.731394 |
| 111 | 6 | 0.000000 | -34.804578 | -1.387501 |
| 112 | 6 | 0.000000 | -39.110899 | -2.946681 |
| 113 | 6 | 0.000000 | -38.440614 | -4.177013 |
| 114 | 6 | 0.000000 | -37.038658 | -4.177036 |
| 115 | 6 | 0.000000 | -36.368344 | -2.946693 |
| 116 | 8 | 0.000000 | -40.487299 | -2.757160 |
| 117 | 8 | 0.000000 | -34.992017 | -2.757194 |
| 118 | 8 | 0.000000 | -34.992017 | 2.757194  |
| 119 | 8 | 0.000000 | -40.487299 | 2.757160  |
| 120 | 1 | 0.000000 | -36.483475 | 5.110310  |

|     |   |          |            |           |
|-----|---|----------|------------|-----------|
| 121 | 1 | 0.000000 | -38.995819 | 5.110274  |
| 122 | 1 | 0.000000 | -38.995819 | -5.110274 |
| 123 | 1 | 0.000000 | -36.483475 | -5.110310 |
| 124 | 8 | 0.000000 | -32.100736 | 2.757301  |
| 125 | 6 | 0.000000 | -27.981732 | -2.946764 |
| 126 | 6 | 0.000000 | -26.417981 | -1.387620 |
| 127 | 6 | 0.000000 | -26.417981 | 1.387620  |
| 128 | 6 | 0.000000 | -27.981732 | 2.946764  |
| 129 | 6 | 0.000000 | -30.724418 | 2.946772  |
| 130 | 6 | 0.000000 | -32.288132 | 1.387592  |
| 131 | 6 | 0.000000 | -28.652731 | -1.711700 |
| 132 | 6 | 0.000000 | -30.053402 | -1.711695 |
| 133 | 6 | 0.000000 | -31.072411 | -0.705377 |
| 134 | 6 | 0.000000 | -31.072411 | 0.705377  |
| 135 | 6 | 0.000000 | -30.053402 | 1.711695  |
| 136 | 6 | 0.000000 | -28.652731 | 1.711700  |
| 137 | 6 | 0.000000 | -27.633722 | 0.705369  |
| 138 | 6 | 0.000000 | -27.633722 | -0.705369 |
| 139 | 6 | 0.000000 | -30.724418 | -2.946772 |
| 140 | 6 | 0.000000 | -32.288132 | -1.387592 |
| 141 | 6 | 0.000000 | -30.054028 | -4.177084 |
| 142 | 6 | 0.000000 | -28.652081 | -4.177075 |
| 143 | 6 | 0.000000 | -30.054028 | 4.177084  |
| 144 | 6 | 0.000000 | -28.652081 | 4.177075  |
| 145 | 6 | 0.000000 | -33.546352 | 0.731394  |
| 146 | 8 | 0.000000 | -26.605313 | -2.757278 |
| 147 | 8 | 0.000000 | -32.100736 | -2.757301 |
| 148 | 8 | 0.000000 | -26.605313 | 2.757278  |
| 149 | 1 | 0.000000 | -30.609198 | -5.110364 |
| 150 | 1 | 0.000000 | -28.096901 | -5.110347 |
| 151 | 1 | 0.000000 | -30.609198 | 5.110364  |
| 152 | 1 | 0.000000 | -28.096901 | 5.110347  |
| 153 | 8 | 0.000000 | -23.714163 | 2.757217  |
| 154 | 6 | 0.000000 | -19.595189 | -2.946720 |
| 155 | 6 | 0.000000 | -18.031403 | -1.387553 |
| 156 | 6 | 0.000000 | -18.031403 | 1.387553  |
| 157 | 6 | 0.000000 | -19.595189 | 2.946720  |
| 158 | 6 | 0.000000 | -22.337765 | 2.946718  |
| 159 | 6 | 0.000000 | -23.901546 | 1.387550  |
| 160 | 6 | 0.000000 | -20.266155 | -1.711642 |
| 161 | 6 | 0.000000 | -21.666803 | -1.711639 |
| 162 | 6 | 0.000000 | -22.685813 | -0.705340 |
| 163 | 6 | 0.000000 | -22.685813 | 0.705340  |
| 164 | 6 | 0.000000 | -21.666803 | 1.711639  |
| 165 | 6 | 0.000000 | -20.266155 | 1.711642  |
| 166 | 6 | 0.000000 | -19.247142 | 0.705342  |
| 167 | 6 | 0.000000 | -19.247142 | -0.705342 |
| 168 | 6 | 0.000000 | -22.337765 | -2.946718 |
| 169 | 6 | 0.000000 | -23.901546 | -1.387550 |
| 170 | 6 | 0.000000 | -21.667452 | -4.177043 |
| 171 | 6 | 0.000000 | -20.265500 | -4.177047 |
| 172 | 6 | 0.000000 | -21.667452 | 4.177043  |
| 173 | 6 | 0.000000 | -20.265500 | 4.177047  |
| 174 | 6 | 0.000000 | -25.159775 | 0.731382  |
| 175 | 6 | 0.000000 | -25.159775 | -0.731382 |
| 176 | 8 | 0.000000 | -18.218785 | -2.757220 |
| 177 | 8 | 0.000000 | -23.714163 | -2.757217 |
| 178 | 8 | 0.000000 | -18.218785 | 2.757220  |
| 179 | 1 | 0.000000 | -22.222634 | -5.110314 |
| 180 | 1 | 0.000000 | -19.710318 | -5.110318 |
| 181 | 1 | 0.000000 | -22.222634 | 5.110314  |
| 182 | 1 | 0.000000 | -19.710318 | 5.110318  |
| 183 | 8 | 0.000000 | -15.327599 | 2.757264  |
| 184 | 6 | 0.000000 | -11.208575 | -2.946751 |
| 185 | 6 | 0.000000 | -9.644809  | -1.387590 |
| 186 | 6 | 0.000000 | -9.644809  | 1.387590  |
| 187 | 6 | 0.000000 | -11.208575 | 2.946751  |
| 188 | 6 | 0.000000 | -13.951195 | 2.946751  |
| 189 | 6 | 0.000000 | -15.514960 | 1.387592  |
| 190 | 6 | 0.000000 | -11.879552 | -1.711674 |
| 191 | 6 | 0.000000 | -13.280218 | -1.711674 |
| 192 | 6 | 0.000000 | -14.299226 | -0.705360 |
| 193 | 6 | 0.000000 | -14.299226 | 0.705360  |
| 194 | 6 | 0.000000 | -13.280218 | 1.711674  |
| 195 | 6 | 0.000000 | -11.879552 | 1.711674  |
| 196 | 6 | 0.000000 | -10.860544 | 0.705359  |
| 197 | 6 | 0.000000 | -10.860544 | -0.705359 |
| 198 | 6 | 0.000000 | -13.951195 | -2.946751 |
| 199 | 6 | 0.000000 | -15.514960 | -1.387592 |

|     |   |          |            |           |
|-----|---|----------|------------|-----------|
| 200 | 6 | 0.000000 | -13.280860 | -4.177067 |
| 201 | 6 | 0.000000 | -11.878909 | -4.177068 |
| 202 | 6 | 0.000000 | -13.280860 | 4.177067  |
| 203 | 6 | 0.000000 | -11.878909 | 4.177068  |
| 204 | 6 | 0.000000 | -16.773177 | 0.731382  |
| 205 | 6 | 0.000000 | -16.773177 | -0.731382 |
| 206 | 6 | 0.000000 | -8.386595  | -0.731382 |
| 207 | 8 | 0.000000 | -9.832170  | -2.757261 |
| 208 | 8 | 0.000000 | -15.327599 | -2.757264 |
| 209 | 8 | 0.000000 | -9.832170  | 2.757261  |
| 210 | 1 | 0.000000 | -13.836036 | -5.110339 |
| 211 | 1 | 0.000000 | -11.323732 | -5.110341 |
| 212 | 1 | 0.000000 | -13.836036 | 5.110339  |
| 213 | 1 | 0.000000 | -11.323732 | 5.110341  |
| 214 | 6 | 0.000000 | -8.386595  | 0.731382  |
| 215 | 6 | 0.000000 | -3.492325  | 4.177057  |
| 216 | 6 | 0.000000 | -5.564597  | 2.946736  |
| 217 | 6 | 0.000000 | -4.894277  | 4.177057  |
| 218 | 6 | 0.000000 | -2.822007  | 2.946735  |
| 219 | 6 | 0.000000 | -7.128374  | -1.387570 |
| 220 | 6 | 0.000000 | -7.128374  | 1.387570  |
| 221 | 6 | 0.000000 | -5.912641  | 0.705349  |
| 222 | 6 | 0.000000 | -5.912641  | -0.705349 |
| 223 | 6 | 0.000000 | -4.893631  | 1.711656  |
| 224 | 6 | 0.000000 | -3.492973  | 1.711655  |
| 225 | 6 | 0.000000 | -2.473966  | 0.705349  |
| 226 | 6 | 0.000000 | -2.473966  | -0.705349 |
| 227 | 6 | 0.000000 | -3.492973  | -1.711655 |
| 228 | 6 | 0.000000 | -4.893631  | -1.711656 |
| 229 | 6 | 0.000000 | -1.258224  | 1.387575  |
| 230 | 6 | 0.000000 | -1.258224  | -1.387575 |
| 231 | 6 | 0.000000 | -5.564597  | -2.946736 |
| 232 | 6 | 0.000000 | -4.894277  | -4.177057 |
| 233 | 6 | 0.000000 | -3.492325  | -4.177057 |
| 234 | 6 | 0.000000 | -2.822007  | -2.946735 |
| 235 | 8 | 0.000000 | -6.941001  | -2.757239 |
| 236 | 8 | 0.000000 | -1.445594  | -2.757237 |
| 237 | 8 | 0.000000 | -1.445594  | 2.757237  |
| 238 | 8 | 0.000000 | -6.941001  | 2.757239  |
| 239 | 1 | 0.000000 | -2.937145  | 5.110328  |
| 240 | 1 | 0.000000 | -5.449457  | 5.110330  |
| 241 | 1 | 0.000000 | -5.449457  | -5.110330 |
| 242 | 1 | 0.000000 | -2.937145  | -5.110328 |
| 243 | 6 | 0.000000 | 30.054028  | 4.177084  |
| 244 | 6 | 0.000000 | 27.981732  | 2.946764  |
| 245 | 6 | 0.000000 | 28.652081  | 4.177075  |
| 246 | 6 | 0.000000 | 30.724418  | 2.946772  |
| 247 | 8 | 0.000000 | 1.445594   | 2.757237  |
| 248 | 6 | 0.000000 | 5.564597   | -2.946736 |
| 249 | 6 | 0.000000 | 7.128374   | -1.387570 |
| 250 | 6 | 0.000000 | 7.128374   | 1.387570  |
| 251 | 6 | 0.000000 | 5.564597   | 2.946736  |
| 252 | 6 | 0.000000 | 2.822007   | 2.946735  |
| 253 | 6 | 0.000000 | 1.258224   | 1.387575  |
| 254 | 6 | 0.000000 | 4.893631   | -1.711656 |
| 255 | 6 | 0.000000 | 3.492973   | -1.711655 |
| 256 | 6 | 0.000000 | 2.473966   | -0.705349 |
| 257 | 6 | 0.000000 | 2.473966   | 0.705349  |
| 258 | 6 | 0.000000 | 3.492973   | 1.711655  |
| 259 | 6 | 0.000000 | 4.893631   | 1.711656  |
| 260 | 6 | 0.000000 | 5.912641   | 0.705349  |
| 261 | 6 | 0.000000 | 5.912641   | -0.705349 |
| 262 | 6 | 0.000000 | 2.822007   | -2.946735 |
| 263 | 6 | 0.000000 | 1.258224   | -1.387575 |
| 264 | 6 | 0.000000 | 3.492325   | -4.177057 |
| 265 | 6 | 0.000000 | 4.894277   | -4.177057 |
| 266 | 6 | 0.000000 | 3.492325   | 4.177057  |
| 267 | 6 | 0.000000 | 4.894277   | 4.177057  |
| 268 | 6 | 0.000000 | 0.000000   | 0.731398  |
| 269 | 6 | 0.000000 | 0.000000   | -0.731398 |
| 270 | 8 | 0.000000 | 6.941001   | -2.757239 |
| 271 | 8 | 0.000000 | 1.445594   | -2.757237 |
| 272 | 8 | 0.000000 | 6.941001   | 2.757239  |
| 273 | 1 | 0.000000 | 2.937145   | -5.110328 |
| 274 | 1 | 0.000000 | 5.449457   | -5.110330 |
| 275 | 1 | 0.000000 | 2.937145   | 5.110328  |
| 276 | 1 | 0.000000 | 5.449457   | 5.110330  |
| 277 | 8 | 0.000000 | 9.832170   | 2.757261  |
| 278 | 6 | 0.000000 | 13.951195  | -2.946751 |

|     |   |          |           |           |
|-----|---|----------|-----------|-----------|
| 279 | 6 | 0.000000 | 15.514960 | -1.387592 |
| 280 | 6 | 0.000000 | 15.514960 | 1.387592  |
| 281 | 6 | 0.000000 | 13.951195 | 2.946751  |
| 282 | 6 | 0.000000 | 11.208575 | 2.946751  |
| 283 | 6 | 0.000000 | 9.644809  | 1.387590  |
| 284 | 6 | 0.000000 | 13.280218 | -1.711674 |
| 285 | 6 | 0.000000 | 11.879552 | -1.711674 |
| 286 | 6 | 0.000000 | 10.860544 | -0.705359 |
| 287 | 6 | 0.000000 | 10.860544 | 0.705359  |
| 288 | 6 | 0.000000 | 11.879552 | 1.711674  |
| 289 | 6 | 0.000000 | 13.280218 | 1.711674  |
| 290 | 6 | 0.000000 | 14.299226 | 0.705360  |
| 291 | 6 | 0.000000 | 14.299226 | -0.705360 |
| 292 | 6 | 0.000000 | 11.208575 | -2.946751 |
| 293 | 6 | 0.000000 | 9.644809  | -1.387590 |
| 294 | 6 | 0.000000 | 11.878909 | -4.177068 |
| 295 | 6 | 0.000000 | 13.280860 | -4.177067 |
| 296 | 6 | 0.000000 | 11.878909 | 4.177068  |
| 297 | 6 | 0.000000 | 13.280860 | 4.177067  |
| 298 | 6 | 0.000000 | 8.386595  | 0.731382  |
| 299 | 6 | 0.000000 | 8.386595  | -0.731382 |
| 300 | 8 | 0.000000 | 15.327599 | -2.757264 |
| 301 | 8 | 0.000000 | 9.832170  | -2.757261 |
| 302 | 8 | 0.000000 | 15.327599 | 2.757264  |
| 303 | 1 | 0.000000 | 11.323732 | -5.110341 |
| 304 | 1 | 0.000000 | 13.836036 | -5.110339 |
| 305 | 1 | 0.000000 | 11.323732 | 5.110341  |
| 306 | 1 | 0.000000 | 13.836036 | 5.110339  |
| 307 | 8 | 0.000000 | 18.218785 | 2.757220  |
| 308 | 6 | 0.000000 | 22.337765 | -2.946718 |
| 309 | 6 | 0.000000 | 23.901546 | -1.387550 |
| 310 | 6 | 0.000000 | 23.901546 | 1.387550  |
| 311 | 6 | 0.000000 | 22.337765 | 2.946718  |
| 312 | 6 | 0.000000 | 19.595189 | 2.946720  |
| 313 | 6 | 0.000000 | 18.031403 | 1.387553  |
| 314 | 6 | 0.000000 | 21.666803 | -1.711639 |
| 315 | 6 | 0.000000 | 20.266155 | -1.711642 |
| 316 | 6 | 0.000000 | 19.247142 | -0.705342 |
| 317 | 6 | 0.000000 | 19.247142 | 0.705342  |
| 318 | 6 | 0.000000 | 20.266155 | 1.711642  |
| 319 | 6 | 0.000000 | 21.666803 | 1.711639  |
| 320 | 6 | 0.000000 | 22.685813 | 0.705340  |
| 321 | 6 | 0.000000 | 22.685813 | -0.705340 |
| 322 | 6 | 0.000000 | 19.595189 | -2.946720 |
| 323 | 6 | 0.000000 | 18.031403 | -1.387553 |
| 324 | 6 | 0.000000 | 20.265500 | -4.177047 |
| 325 | 6 | 0.000000 | 21.667452 | -4.177043 |
| 326 | 6 | 0.000000 | 20.265500 | 4.177047  |
| 327 | 6 | 0.000000 | 21.667452 | 4.177043  |
| 328 | 6 | 0.000000 | 16.773177 | 0.731382  |
| 329 | 6 | 0.000000 | 16.773177 | -0.731382 |
| 330 | 6 | 0.000000 | 25.159775 | -0.731382 |
| 331 | 8 | 0.000000 | 23.714163 | -2.757217 |
| 332 | 8 | 0.000000 | 18.218785 | -2.757220 |
| 333 | 8 | 0.000000 | 23.714163 | 2.757217  |
| 334 | 1 | 0.000000 | 19.710318 | -5.110318 |
| 335 | 1 | 0.000000 | 22.222634 | -5.110314 |
| 336 | 1 | 0.000000 | 19.710318 | 5.110318  |
| 337 | 1 | 0.000000 | 22.222634 | 5.110314  |
| 338 | 6 | 0.000000 | 25.159775 | 0.731382  |
| 339 | 6 | 0.000000 | 26.417981 | -1.387620 |
| 340 | 6 | 0.000000 | 26.417981 | 1.387620  |
| 341 | 6 | 0.000000 | 27.633722 | 0.705369  |
| 342 | 6 | 0.000000 | 27.633722 | -0.705369 |
| 343 | 6 | 0.000000 | 28.652731 | 1.711700  |
| 344 | 6 | 0.000000 | 30.053402 | 1.711695  |
| 345 | 6 | 0.000000 | 31.072411 | 0.705377  |
| 346 | 6 | 0.000000 | 31.072411 | -0.705377 |
| 347 | 6 | 0.000000 | 30.053402 | -1.711695 |
| 348 | 6 | 0.000000 | 28.652731 | -1.711700 |
| 349 | 6 | 0.000000 | 32.288132 | 1.387592  |
| 350 | 6 | 0.000000 | 33.546352 | -0.731394 |
| 351 | 6 | 0.000000 | 32.288132 | -1.387592 |
| 352 | 6 | 0.000000 | 27.981732 | -2.946764 |
| 353 | 6 | 0.000000 | 28.652081 | -4.177075 |
| 354 | 6 | 0.000000 | 30.054028 | -4.177084 |
| 355 | 6 | 0.000000 | 30.724418 | -2.946772 |
| 356 | 8 | 0.000000 | 26.605313 | -2.757278 |
| 357 | 8 | 0.000000 | 32.100736 | -2.757301 |



|     |   |          |           |           |
|-----|---|----------|-----------|-----------|
| 358 | 8 | 0.000000 | 32.100736 | 2.757301  |
| 359 | 8 | 0.000000 | 26.605313 | 2.757278  |
| 360 | 1 | 0.000000 | 30.609198 | 5.110364  |
| 361 | 1 | 0.000000 | 28.096901 | 5.110347  |
| 362 | 1 | 0.000000 | 28.096901 | -5.110347 |
| 363 | 1 | 0.000000 | 30.609198 | -5.110364 |
| 364 | 8 | 0.000000 | 34.992017 | 2.757194  |
| 365 | 6 | 0.000000 | 39.110899 | -2.946681 |
| 366 | 6 | 0.000000 | 40.674708 | -1.387505 |
| 367 | 6 | 0.000000 | 40.674708 | 1.387505  |
| 368 | 6 | 0.000000 | 39.110899 | 2.946681  |
| 369 | 6 | 0.000000 | 36.368344 | 2.946693  |
| 370 | 6 | 0.000000 | 34.804578 | 1.387501  |
| 371 | 6 | 0.000000 | 38.439947 | -1.711606 |
| 372 | 6 | 0.000000 | 37.039330 | -1.711613 |
| 373 | 6 | 0.000000 | 36.020313 | -0.705330 |
| 374 | 6 | 0.000000 | 36.020313 | 0.705330  |
| 375 | 6 | 0.000000 | 37.039330 | 1.711613  |
| 376 | 6 | 0.000000 | 38.439947 | 1.711606  |
| 377 | 6 | 0.000000 | 39.458972 | 0.705325  |
| 378 | 6 | 0.000000 | 39.458972 | -0.705325 |
| 379 | 6 | 0.000000 | 36.368344 | -2.946693 |
| 380 | 6 | 0.000000 | 34.804578 | -1.387501 |
| 381 | 6 | 0.000000 | 37.038658 | -4.177036 |
| 382 | 6 | 0.000000 | 38.440614 | -4.177013 |
| 383 | 6 | 0.000000 | 37.038658 | 4.177036  |
| 384 | 6 | 0.000000 | 38.440614 | 4.177013  |
| 385 | 6 | 0.000000 | 33.546352 | 0.731394  |
| 386 | 8 | 0.000000 | 40.487299 | -2.757160 |
| 387 | 8 | 0.000000 | 34.992017 | -2.757194 |
| 388 | 8 | 0.000000 | 40.487299 | 2.757160  |
| 389 | 1 | 0.000000 | 36.483475 | -5.110310 |
| 390 | 1 | 0.000000 | 38.995819 | -5.110274 |
| 391 | 1 | 0.000000 | 36.483475 | 5.110310  |
| 392 | 1 | 0.000000 | 38.995819 | 5.110274  |
| 393 | 8 | 0.000000 | 43.378464 | 2.757320  |
| 394 | 6 | 0.000000 | 47.497569 | -2.946780 |
| 395 | 6 | 0.000000 | 49.061309 | -1.387625 |
| 396 | 6 | 0.000000 | 49.061309 | 1.387625  |
| 397 | 6 | 0.000000 | 47.497569 | 2.946780  |
| 398 | 6 | 0.000000 | 44.754891 | 2.946785  |
| 399 | 6 | 0.000000 | 43.191137 | 1.387643  |
| 400 | 6 | 0.000000 | 46.826577 | -1.711704 |
| 401 | 6 | 0.000000 | 45.425889 | -1.711718 |
| 402 | 6 | 0.000000 | 44.406873 | -0.705376 |
| 403 | 6 | 0.000000 | 44.406873 | 0.705376  |
| 404 | 6 | 0.000000 | 45.425889 | 1.711718  |
| 405 | 6 | 0.000000 | 46.826577 | 1.711704  |
| 406 | 6 | 0.000000 | 47.845591 | 0.705382  |
| 407 | 6 | 0.000000 | 47.845591 | -0.705382 |
| 408 | 6 | 0.000000 | 44.754891 | -2.946785 |
| 409 | 6 | 0.000000 | 43.191137 | -1.387643 |
| 410 | 6 | 0.000000 | 45.425242 | -4.177092 |
| 411 | 6 | 0.000000 | 46.827197 | -4.177076 |
| 412 | 6 | 0.000000 | 45.425242 | 4.177092  |
| 413 | 6 | 0.000000 | 46.827197 | 4.177076  |
| 414 | 6 | 0.000000 | 41.932966 | 0.731390  |
| 415 | 6 | 0.000000 | 41.932966 | -0.731390 |
| 416 | 8 | 0.000000 | 48.873956 | -2.757317 |
| 417 | 8 | 0.000000 | 43.378464 | -2.757320 |
| 418 | 8 | 0.000000 | 48.873956 | 2.757317  |
| 419 | 1 | 0.000000 | 44.870074 | -5.110368 |
| 420 | 1 | 0.000000 | 47.382376 | -5.110347 |
| 421 | 1 | 0.000000 | 44.870074 | 5.110368  |
| 422 | 1 | 0.000000 | 47.382376 | 5.110347  |
| 423 | 8 | 0.000000 | 51.765123 | 2.757197  |
| 424 | 6 | 0.000000 | 55.884189 | -2.946580 |
| 425 | 6 | 0.000000 | 57.448044 | -1.387368 |
| 426 | 6 | 0.000000 | 57.448044 | 1.387368  |
| 427 | 6 | 0.000000 | 55.884189 | 2.946580  |
| 428 | 6 | 0.000000 | 53.141576 | 2.946698  |
| 429 | 6 | 0.000000 | 51.577741 | 1.387541  |
| 430 | 6 | 0.000000 | 55.213140 | -1.711563 |
| 431 | 6 | 0.000000 | 53.812523 | -1.711627 |
| 432 | 6 | 0.000000 | 52.793476 | -0.705325 |
| 433 | 6 | 0.000000 | 52.793476 | 0.705325  |
| 434 | 6 | 0.000000 | 53.812523 | 1.711627  |
| 435 | 6 | 0.000000 | 55.213140 | 1.711563  |
| 436 | 6 | 0.000000 | 56.232106 | 0.705210  |

|     |   |          |           |           |
|-----|---|----------|-----------|-----------|
| 437 | 6 | 0.000000 | 56.232106 | -0.705210 |
| 438 | 6 | 0.000000 | 53.141576 | -2.946698 |
| 439 | 6 | 0.000000 | 51.577741 | -1.387541 |
| 440 | 6 | 0.000000 | 53.811912 | -4.177007 |
| 441 | 6 | 0.000000 | 55.213871 | -4.176922 |
| 442 | 6 | 0.000000 | 53.811912 | 4.177007  |
| 443 | 6 | 0.000000 | 55.213871 | 4.176922  |
| 444 | 6 | 0.000000 | 50.319530 | 0.731387  |
| 445 | 6 | 0.000000 | 50.319530 | -0.731387 |
| 446 | 6 | 0.000000 | 58.706083 | -0.731264 |
| 447 | 8 | 0.000000 | 57.260514 | -2.757111 |
| 448 | 8 | 0.000000 | 51.765123 | -2.757197 |
| 449 | 8 | 0.000000 | 57.260514 | 2.757111  |
| 450 | 1 | 0.000000 | 53.256776 | -5.110306 |
| 451 | 1 | 0.000000 | 55.769115 | -5.110159 |
| 452 | 1 | 0.000000 | 53.256776 | 5.110306  |
| 453 | 1 | 0.000000 | 55.769115 | 5.110159  |
| 454 | 6 | 0.000000 | 58.706083 | 0.731264  |
| 455 | 6 | 0.000000 | 63.604631 | 4.173187  |
| 456 | 6 | 0.000000 | 61.528397 | 2.947665  |
| 457 | 6 | 0.000000 | 62.202359 | 4.176049  |
| 458 | 6 | 0.000000 | 64.275910 | 2.941869  |
| 459 | 6 | 0.000000 | 59.964739 | -1.388139 |
| 460 | 6 | 0.000000 | 59.964739 | 1.388139  |
| 461 | 6 | 0.000000 | 61.179778 | 0.705533  |
| 462 | 6 | 0.000000 | 61.179778 | -0.705533 |
| 463 | 6 | 0.000000 | 62.199015 | 1.713002  |
| 464 | 6 | 0.000000 | 63.598225 | 1.711535  |
| 465 | 6 | 0.000000 | 64.611986 | 0.698756  |
| 466 | 6 | 0.000000 | 64.611986 | -0.698756 |
| 467 | 6 | 0.000000 | 63.598225 | -1.711535 |
| 468 | 6 | 0.000000 | 62.199015 | -1.713002 |
| 469 | 6 | 0.000000 | 65.842517 | 1.375731  |
| 470 | 6 | 0.000000 | 67.071569 | 0.701491  |
| 471 | 6 | 0.000000 | 67.071569 | -0.701491 |
| 472 | 6 | 0.000000 | 65.842517 | -1.375731 |
| 473 | 6 | 0.000000 | 61.528397 | -2.947665 |
| 474 | 6 | 0.000000 | 62.202359 | -4.176049 |
| 475 | 6 | 0.000000 | 63.604631 | -4.173187 |
| 476 | 6 | 0.000000 | 64.275910 | -2.941869 |
| 477 | 8 | 0.000000 | 60.151244 | -2.758022 |
| 478 | 8 | 0.000000 | 65.651764 | -2.752082 |
| 479 | 8 | 0.000000 | 65.651764 | 2.752082  |
| 480 | 8 | 0.000000 | 60.151244 | 2.758022  |
| 481 | 1 | 0.000000 | 64.159877 | 5.106527  |
| 482 | 1 | 0.000000 | 61.649963 | 5.111073  |
| 483 | 1 | 0.000000 | 61.649963 | -5.111073 |
| 484 | 1 | 0.000000 | 64.159877 | -5.106527 |
| 485 | 1 | 0.000000 | 68.006558 | 1.254083  |
| 486 | 1 | 0.000000 | 68.006558 | -1.254083 |

-----
